# Supplementary material
Source: Oxford University Press journal article supplement (doi:10.1093/ecco-jcc_jjz180)

## **ECCO GRADE CD Treatment Guidelines**

### **Supplementary Material**

#### **Content:**

1. Section 1: Description of the process
2. Section 2: List of outcomes
3. Section 3: Search strategy
4. Section 4: Summary of Findings Tables
  - a. Induction therapy
  - b. Maintenance therapy
  - c. Treatment of Complex Perianal disease
5. Section 5: Supplementary Figures

## Section 1: Description of the process

Three domains for medical treatment of CD were identified: 1) induction therapy; 2) maintenance therapy, and 3) therapy of perianal fistulizing disease. All panelists were assigned to 3 working groups coordinated by 1-2 working group leaders under the supervision of 2 main Guideline coordinators. The panelists first formulated a series of specific questions in the PICO format (Population, Intervention, Comparator, Outcomes) that were deemed to be clinically important for the medical treatment of CD. The outcomes of all PICO questions were subsequently graded as "not important", "important" or "critical" during a face-to-face kickoff meeting in Vienna in March 2018, using a Delphi consensus process. The list of outcomes and the grading of each outcome are displayed in *Section 2*.

Based on the PICO statements, a broad systematic literature search was prepared by librarians using a predetermined protocol, for each PICO and in accordance with the Preferred Reporting Items for Systematic Reviews and Meta-Analyses (PRISMA) checklist. Relevant studies were searched in the PubMed/MEDLINE, and EMBASE (Excerpta Medica Database), and Cochrane CENTRAL databases (time period was restricted to the last 20 years). Only studies published in English were eligible. An outline of the detailed search strategy performed for each PICO is in each database is available in *Section 3*.

Two reviewers independently conducted an initial screen of abstracts for eligibility and evaluated the full-text articles of identified abstracts for final eligibility, according to the PICO. Disagreements were resolved by consensus and, if necessary, by involvement of the working group leader and/or coordinator.

Each working group member was responsible to systematically review and summarize the evidence on every outcome, for a given questions, in order to compile a Summary of Findings (SoF) table for each question. The SOF tables generated for each PICO are available in section 4. When needed data from individual studies were pooled and analysed using random-effects meta-analysis as appropriate. The forest plots from these analysis are displayed in Section 5.

## Section 2: List of outcomes

| Outcome                                                        | Importance                  | Median | Disagreement index |
|----------------------------------------------------------------|-----------------------------|--------|--------------------|
| <b><i>Common outcomes</i></b>                                  |                             |        |                    |
| Clinical response                                              | Critical                    | 7      | 0.37               |
| Clinical remission                                             | Critical                    | 8      | 0.29               |
| Biochemical improvement                                        | Important, but not critical | 6      | 0.32               |
| Biochemical remission                                          | Important, but not critical | 6      | 0.33               |
| Quality of life                                                | Critical                    | 8      | 0.29               |
| PRO response                                                   | Important, but not critical | 6      | 0.58               |
| PRO remission                                                  | Critical                    | 7      | 0.65               |
| Radiologic improvement                                         | Important, but not critical | 5      | 0.52               |
| Radiologic remission                                           | Important, but not critical | 5      | 0.97               |
| Steroid free clinical remission                                | Critical                    | 8      | 0.22               |
| ANY adverse events AEs                                         | Critical                    | 7      | 0.22               |
| Serious adverse events SAEs                                    | Critical                    | 9      | 0.13               |
| Adverse events leading to treatment discontinuation            | Critical                    | 7      | 0.29               |
| Serious infections                                             | Critical                    | 8      | 0.22               |
| Cancer                                                         | Critical                    | 8      | 0.13               |
| Hematologic malignancies                                       | Critical                    | 8      | 0.29               |
| <b><i>Working Group 1 (Induction of remission)</i></b>         |                             |        |                    |
| Endoscopic response WG1                                        | Important, but not critical | 6      | 0.52               |
| Endoscopic remission WG1                                       | Important, but not critical | 6      | 0.58               |
| Mucosal healing WG1                                            | Important, but not critical | 6      | 0.65               |
| Regain of clinical response WG1                                | Critical                    | 7      | 0.22               |
| <b><i>Working Group 2 (Maintainance of remission)</i></b>      |                             |        |                    |
| Endoscopic response WG2                                        | Important, but not critical | 6      | 0.52               |
| Endoscopic remission WG2                                       | Critical                    | 7      | 0.37               |
| Mucosal healing WG2                                            | Critical                    | 8      | 0.24               |
| Regain of clinical response WG2                                | Critical                    | 7      | 0.22               |
| <b><i>Working Group 3 (Management of perianal disease)</i></b> |                             |        |                    |
| Fistula healing                                                | Critical                    | 8      | 0.13               |

| <b>Outcome</b>                                          | <b>Importance</b>           | <b>Median</b> | <b>Disagreement index</b> |
|---------------------------------------------------------|-----------------------------|---------------|---------------------------|
| Maintenance of clinical fistula remission               | Critical                    | 8             | 0.13                      |
| Resolution of perianal sepsis                           | Critical                    | 8             | 0.22                      |
| Successful restoration of continuity                    | Critical                    | 7             | 0.37                      |
| <b><i>Working Group 4 (Surgery in abdominal CD)</i></b> |                             |               |                           |
| Length of hospital stay                                 | Important, but not critical | 5             | 0.85                      |
| Reduced pain                                            | Important, but not critical | 6             | 0.22                      |
| Improved cosmesis                                       | Important, but not critical | 5             | 0.85                      |
| Stoma free survival                                     | Critical                    | 7             | 0.33                      |
| Temporary stoma                                         | Important, but not critical | 6             | 0.50                      |
| Minor surgical complications                            | Important, but not critical | 6             | 0.52                      |
| Major surgical complications                            | Critical                    | 8             | 0.29                      |
| Post operative sepsis                                   | Critical                    | 8             | 0.16                      |
| Surgical recurrence WG4                                 | Critical                    | 7             | 0.16                      |
| Sepsis control                                          | Critical                    | 7             | 0.16                      |
| Symptomatic improvement                                 | Critical                    | 7             | 0.48                      |
| Time to clinical recurrence                             | Critical                    | 7             | 0.29                      |
| Time to endoscopic recurrence <sup>1</sup>              | Critical                    | 7             | 0.22                      |
| Time to surgical recurrence                             | Critical                    | 7             | 0.16                      |
| Length of intestinal resection                          | Critical                    | 7             | 0.37                      |

---

<sup>1</sup> After re-vote. Original voting was: median = 6, DI = 0.52

### **Section 3:** Search Strategy

A systematic literature search was conducted by a qualified team of librarians using predetermined search terms in Pubmed/Medline, Embase and Cochrane Central. The search strings for each PICO question are available for consultation in Supplementary Files 1, 2 and 3.

## Section 4: Summary of Findings Tables (SOF)

### Summary Of Findings Tables Referring To Induction Treatment Of Crohn's Disease (Section 1 In Manuscript)

#### Summary of Findings Table 1 (5-aminosalicylates and sulphasalazine versus placebo )

| <b>PICO question:</b> 5-ASA compound vs. placebo<br><b>P:</b> Adult patients, mild Crohn's disease with activity, small and/or large intestine<br><b>I:</b> 5-ASA compound, any preparation, any dose<br><b>C:</b> No treatment or placebo                                                                                                                                                                                                                                                                                                                                                                                                                                                                                                                                                                                                                                                                                                                                                                                                                                                                                                                                                                                                                                                                                                                                                                                                                                                                                      |                    |               |              |                      |                  |                             |                         |                              |                          |                              |                                                |
|---------------------------------------------------------------------------------------------------------------------------------------------------------------------------------------------------------------------------------------------------------------------------------------------------------------------------------------------------------------------------------------------------------------------------------------------------------------------------------------------------------------------------------------------------------------------------------------------------------------------------------------------------------------------------------------------------------------------------------------------------------------------------------------------------------------------------------------------------------------------------------------------------------------------------------------------------------------------------------------------------------------------------------------------------------------------------------------------------------------------------------------------------------------------------------------------------------------------------------------------------------------------------------------------------------------------------------------------------------------------------------------------------------------------------------------------------------------------------------------------------------------------------------|--------------------|---------------|--------------|----------------------|------------------|-----------------------------|-------------------------|------------------------------|--------------------------|------------------------------|------------------------------------------------|
| Nr of participants (studies) Follow-up                                                                                                                                                                                                                                                                                                                                                                                                                                                                                                                                                                                                                                                                                                                                                                                                                                                                                                                                                                                                                                                                                                                                                                                                                                                                                                                                                                                                                                                                                          | Quality assessment |               |              |                      |                  |                             | Summary of Findings     |                              |                          |                              |                                                |
|                                                                                                                                                                                                                                                                                                                                                                                                                                                                                                                                                                                                                                                                                                                                                                                                                                                                                                                                                                                                                                                                                                                                                                                                                                                                                                                                                                                                                                                                                                                                 | Risk of bias       | Inconsistency | Indirectness | Imprecision          | Publication bias | Overall quality of evidence | Study event rates       |                              | Relative effect (95% CI) | Anticipated absolute effects |                                                |
|                                                                                                                                                                                                                                                                                                                                                                                                                                                                                                                                                                                                                                                                                                                                                                                                                                                                                                                                                                                                                                                                                                                                                                                                                                                                                                                                                                                                                                                                                                                                 |                    |               |              |                      |                  |                             | Risk with control group | Risk with intervention group |                          | Risk with control group      | Risk difference with intervention group        |
| <b>Clinical remission (critical outcome)</b>                                                                                                                                                                                                                                                                                                                                                                                                                                                                                                                                                                                                                                                                                                                                                                                                                                                                                                                                                                                                                                                                                                                                                                                                                                                                                                                                                                                                                                                                                    |                    |               |              |                      |                  |                             |                         |                              |                          |                              |                                                |
| N: 930<br>(7 studies)<br>10–18 weeks                                                                                                                                                                                                                                                                                                                                                                                                                                                                                                                                                                                                                                                                                                                                                                                                                                                                                                                                                                                                                                                                                                                                                                                                                                                                                                                                                                                                                                                                                            | Not serious        | Not serious   | Not serious  | Not serious          | Undetected       | High                        | 94/357 (26.3%)          | 182/573 (31.8%)              | RR, 1.28<br>(0.97–1.69)  | 263 per 1000                 | 74 more per 1000<br>(from 7 fewer to 182 more) |
| <b>Withdrawals due to adverse events (critical outcome)</b>                                                                                                                                                                                                                                                                                                                                                                                                                                                                                                                                                                                                                                                                                                                                                                                                                                                                                                                                                                                                                                                                                                                                                                                                                                                                                                                                                                                                                                                                     |                    |               |              |                      |                  |                             |                         |                              |                          |                              |                                                |
| N: 698<br>(6 studies)<br>10–18 weeks                                                                                                                                                                                                                                                                                                                                                                                                                                                                                                                                                                                                                                                                                                                                                                                                                                                                                                                                                                                                                                                                                                                                                                                                                                                                                                                                                                                                                                                                                            | Not serious        | Not serious   | Not serious  | Serious <sup>1</sup> | Undetected       | Moderate                    | 22/282 (7.8%)           | 50/416 (12.0%)               | RR, 1.13<br>(0.70–1.84)  | 78 per 1000                  | 18 more per 1000<br>(from 23 fewer to 65 more) |
| <b>References:</b><br>-- Crohn's II study. In: Ford A, Kane S, Khan K, et al. Efficacy of 5-aminosalicylates in Crohn's disease: systematic review and meta-analysis. American Journal of Gastroenterology 2011; 106: 617–629.<br>-- Tremaine W, Schroeder K, Harrison J, et al. A randomized, double-blind, placebo-controlled trial of the oral mesalamine (5-ASA) preparation, Asacol, in the treatment of symptomatic Crohn's colitis and ileocolitis. Journal of Clinical Gastroenterology 1994; 19: 278–282.<br>-- Singleton J, Hanauer S, Gitnick G, et al. Mesalamine capsules for the treatment of active Crohn's disease: results of a 16-week trial. Pentasa Crohn's Disease Study Group. Gastroenterology 1993; 104: 1293–1301.<br>-- Rasmussen S, Lauritsen K, Tage-Jensen U, et al. 5-Aminosalicylic acid in the treatment of Crohn's disease. A 16-week double-blind, placebo-controlled, multicentre study with Pentasa. Scandinavian Journal of Gastroenterology 1987; 22: 877–883.<br>-- PEACE study: a study with pentasa in patients with active crohn's disease. Available from <a href="http://clinicaltrials.gov/show/NCT00862121">http://clinicaltrials.gov/show/NCT00862121</a> .<br>-- Malchow H, Ewe K, Brandes J, et al. European Cooperative Crohn's disease study (ECCDS): results of drug treatment. Gastroenterology 1984; 86: 249–266.<br>-- Summers R, Switz D, Sessions J, et al. National Cooperative Crohn's disease study: results of drug treatment. Gastroenterology 1979; 77: 847–869. |                    |               |              |                      |                  |                             |                         |                              |                          |                              |                                                |
| <b>Footnotes:</b><br><sup>1</sup> Sparse data (72 events)                                                                                                                                                                                                                                                                                                                                                                                                                                                                                                                                                                                                                                                                                                                                                                                                                                                                                                                                                                                                                                                                                                                                                                                                                                                                                                                                                                                                                                                                       |                    |               |              |                      |                  |                             |                         |                              |                          |                              |                                                |
| <b>Comment:</b> Evidence was sought also for clinical response, PRO response and remission, biochemical and endoscopic improvement, and serious adverse events; however, data were insufficient.                                                                                                                                                                                                                                                                                                                                                                                                                                                                                                                                                                                                                                                                                                                                                                                                                                                                                                                                                                                                                                                                                                                                                                                                                                                                                                                                |                    |               |              |                      |                  |                             |                         |                              |                          |                              |                                                |
| <b>Abbreviations:</b> 5-ASA, 5-aminosalicylic acid; RR, risk ratio; CI, confidence interval.                                                                                                                                                                                                                                                                                                                                                                                                                                                                                                                                                                                                                                                                                                                                                                                                                                                                                                                                                                                                                                                                                                                                                                                                                                                                                                                                                                                                                                    |                    |               |              |                      |                  |                             |                         |                              |                          |                              |                                                |

## Summary of Findings Table 2 (Budesonide versus placebo)

| <b>PICO question:</b> Budesonide vs. placebo<br><b>P:</b> Adult patients, mild Crohn's disease with activity, small and/or large intestine<br><b>I:</b> Budesonide, any preparation, dose of 9 mg daily<br><b>C:</b> No treatment or placebo |                    |               |                      |             |                  |                             |                         |                              |                          |                              |                                              |
|----------------------------------------------------------------------------------------------------------------------------------------------------------------------------------------------------------------------------------------------|--------------------|---------------|----------------------|-------------|------------------|-----------------------------|-------------------------|------------------------------|--------------------------|------------------------------|----------------------------------------------|
| Nr of participants (studies) Follow-up                                                                                                                                                                                                       | Quality assessment |               |                      |             |                  |                             | Summary of Findings     |                              |                          |                              |                                              |
|                                                                                                                                                                                                                                              | Risk of bias       | Inconsistency | Indirectness         | Imprecision | Publication bias | Overall quality of evidence | Study event rates       |                              | Relative effect (95% CI) | Anticipated absolute effects |                                              |
|                                                                                                                                                                                                                                              |                    |               |                      |             |                  |                             | Risk with control group | Risk with intervention group |                          | Risk with control group      | Risk difference with intervention group      |
| <b>Clinical remission (critical outcome)</b>                                                                                                                                                                                                 |                    |               |                      |             |                  |                             |                         |                              |                          |                              |                                              |
| N: 379 (3 studies) 8 weeks                                                                                                                                                                                                                   | Not serious        | Not serious   | Not serious          | Not serious | Undetected       | High                        | 29/133 (21.8%)          | 115/246 (46.7%)              | RR, 1.93 (1.37–2.73)     | 218 per 1000                 | 204 more per 1000 (from 81 more to 378 more) |
| <b>Clinical response (critical outcome)</b>                                                                                                                                                                                                  |                    |               |                      |             |                  |                             |                         |                              |                          |                              |                                              |
| N: 252 (2 studies) 8 weeks                                                                                                                                                                                                                   | Not serious        | Not serious   | Not serious          | Not serious | Undetected       | High                        | 22/67 (32.8%)           | 108/185 (58.4%)              | RR, 1.46 (1.03–2.07)     | 328 per 1000                 | 151 more per 1000 (from 10 more to 352 more) |
| <b>Adverse events (critical outcome)</b>                                                                                                                                                                                                     |                    |               |                      |             |                  |                             |                         |                              |                          |                              |                                              |
| N: 379 (3 studies) 8 weeks                                                                                                                                                                                                                   | Not serious        | Not serious   | Serious <sup>1</sup> | Not serious | Undetected       | Moderate                    | 44/133 (33.1%)          | 115/246 (46.7%)              | RR, 0.98 (0.77–1.25)     | 331 per 1000                 | 6 fewer per 1000 (from 75 fewer to 81 more)  |
| <b>Reference:</b> Rezaie A, Kuenzig ME, Benchimol EI, et al. Budesonide for induction of remission in Crohn's disease. Cochrane Database of Systematic Reviews 2015; Issue 6. Art. No.: CD000296.                                            |                    |               |                      |             |                  |                             |                         |                              |                          |                              |                                              |
| <b>Footnotes:</b><br><sup>1</sup> The meta-analysis reported the impact of the intervention of interest on corticosteroid-related adverse events, which is an outcome closely related to, but different from adverse events.                 |                    |               |                      |             |                  |                             |                         |                              |                          |                              |                                              |
| <b>Comment:</b> Evidence was sought also for PRO response, PRO remission, biochemical improvement, endoscopic improvement, serious adverse events; however, data were insufficient.                                                          |                    |               |                      |             |                  |                             |                         |                              |                          |                              |                                              |
| <b>Abbreviations:</b> RR, risk ratio; CI, confidence interval.                                                                                                                                                                               |                    |               |                      |             |                  |                             |                         |                              |                          |                              |                                              |

### Summary of Findings Table 3 - (Budesonide versus 5-aminosalicylates)

| <b>PICO question:</b> Budesonide vs. 5-aminosalicylate compound<br><b>P:</b> Adult patients, mild Crohn's disease with activity, small and/or large intestine<br><b>I:</b> Budesonide, any preparation, dose of 9 mg daily<br><b>C:</b> 5-aminosalicylate compound, any preparation                                                                                                                                                                                                                                                                                                                                                                                                                   |                    |                      |              |                      |                  |                             |                         |                              |                          |                              |                                               |
|-------------------------------------------------------------------------------------------------------------------------------------------------------------------------------------------------------------------------------------------------------------------------------------------------------------------------------------------------------------------------------------------------------------------------------------------------------------------------------------------------------------------------------------------------------------------------------------------------------------------------------------------------------------------------------------------------------|--------------------|----------------------|--------------|----------------------|------------------|-----------------------------|-------------------------|------------------------------|--------------------------|------------------------------|-----------------------------------------------|
| Nr of participants (studies) Follow-up                                                                                                                                                                                                                                                                                                                                                                                                                                                                                                                                                                                                                                                                | Quality assessment |                      |              |                      |                  |                             | Summary of Findings     |                              |                          |                              |                                               |
|                                                                                                                                                                                                                                                                                                                                                                                                                                                                                                                                                                                                                                                                                                       | Risk of bias       | Inconsistency        | Indirectness | Imprecision          | Publication bias | Overall quality of evidence | Study event rates       |                              | Relative effect (95% CI) | Anticipated absolute effects |                                               |
|                                                                                                                                                                                                                                                                                                                                                                                                                                                                                                                                                                                                                                                                                                       |                    |                      |              |                      |                  |                             | Risk with control group | Risk with intervention group |                          | Risk with control group      | Risk difference with intervention group       |
| <b>Clinical remission (critical outcome)</b>                                                                                                                                                                                                                                                                                                                                                                                                                                                                                                                                                                                                                                                          |                    |                      |              |                      |                  |                             |                         |                              |                          |                              |                                               |
| N: 601 (3 studies) 8 weeks                                                                                                                                                                                                                                                                                                                                                                                                                                                                                                                                                                                                                                                                            | Not serious        | Serious <sup>1</sup> | Not serious  | Not serious          | Undetected       | Moderate                    | 146/298 (49.0%)         | 187/303 (61.7%)              | RR, 1.30 (0.98–1.72)     | 490 per 1000                 | 146 more per 1000 (from 10 fewer to 354 more) |
| <b>Clinical response (critical outcome)</b>                                                                                                                                                                                                                                                                                                                                                                                                                                                                                                                                                                                                                                                           |                    |                      |              |                      |                  |                             |                         |                              |                          |                              |                                               |
| N: 601 (3 studies) 8 weeks                                                                                                                                                                                                                                                                                                                                                                                                                                                                                                                                                                                                                                                                            | Not serious        | Not serious          | Not serious  | Not serious          | Undetected       | High                        | 172/298 (57.7%)         | 212/303 (70.0%)              | RR, 1.22 (1.03–1.45)     | 577 per 1000                 | 127 more per 1000 (from 15 more to 259 more)  |
| <b>Any adverse events, AEs (critical outcome)</b>                                                                                                                                                                                                                                                                                                                                                                                                                                                                                                                                                                                                                                                     |                    |                      |              |                      |                  |                             |                         |                              |                          |                              |                                               |
| N: 601 (3 studies) 8 weeks                                                                                                                                                                                                                                                                                                                                                                                                                                                                                                                                                                                                                                                                            | Not serious        | Not serious          | Not serious  | Not serious          | Undetected       | High                        | 161/298 (54.0%)         | 151/303 (49.8%)              | RR, 0.91 (0.79–1.05)     | 540 per 1000                 | 48 fewer per 1000 (from 115 fewer to 29 more) |
| <b>Serious adverse events, SAEs (critical outcome)</b>                                                                                                                                                                                                                                                                                                                                                                                                                                                                                                                                                                                                                                                |                    |                      |              |                      |                  |                             |                         |                              |                          |                              |                                               |
| N: 294 (2 studies) 8 weeks                                                                                                                                                                                                                                                                                                                                                                                                                                                                                                                                                                                                                                                                            | Not serious        | Not serious          | Not serious  | Serious <sup>2</sup> | Undetected       | Moderate                    | 18/145 (12.4%)          | 14/149 (9.4%)                | RR, 0.94 (0.24–3.75)     | 124 per 1000                 | 7 fewer per 1000 (from 95 fewer to 341 more)  |
| <b>References:</b><br>-- Thomsen OO, Cortot A, Jewell D, et al. A comparison of budesonide and mesalamine for active Crohn's disease. <i>New England Journal of Medicine</i> 1998; 339(6): 370–374.<br>-- Tromm A, Bunganic I, Tomsova E, et al. Budesonide 9 mg is at least as effective as mesalamine 4.5 g in patients with mildly to moderately active Crohn's disease. <i>Gastroenterology</i> 2011; 140(2): 425–434.e1.<br>-- Yokoyama T, Ohta A, Motoya S, et al. Efficacy and safety of oral budesonide in patients with active Crohn's disease in Japan: A multicenter, double-blind, randomized, parallel-group phase 3 study. <i>Inflammatory Intestinal Diseases</i> 2018; 2(3): 154–162. |                    |                      |              |                      |                  |                             |                         |                              |                          |                              |                                               |
| <b>Footnotes:</b><br><sup>1</sup> Heterogeneity: $I^2 = 62\%$<br><sup>2</sup> Sparse data (32 events)                                                                                                                                                                                                                                                                                                                                                                                                                                                                                                                                                                                                 |                    |                      |              |                      |                  |                             |                         |                              |                          |                              |                                               |
| <b>Comment:</b> We also searched for evidence regarding PRO response and remission, biochemical and endoscopic improvement; however, data were insufficient.                                                                                                                                                                                                                                                                                                                                                                                                                                                                                                                                          |                    |                      |              |                      |                  |                             |                         |                              |                          |                              |                                               |
| <b>Abbreviations:</b> N/A, not applicable; RR, risk ratio; CI, confidence interval.                                                                                                                                                                                                                                                                                                                                                                                                                                                                                                                                                                                                                   |                    |                      |              |                      |                  |                             |                         |                              |                          |                              |                                               |



## Summary of Findings Table 4 (Systemic corticosteroid (Prednisolone, prednisone) versus placebo)

| <b>PICO question:</b> Systemic corticosteroid (prednisolone, prednisone) vs. placebo<br><b>P:</b> Adult patients, Crohn's Disease with moderate to severe activity, small and/or large intestine<br><b>I:</b> Systemic corticosteroid (prednisolone, prednisone)<br><b>C:</b> No treatment or placebo |                    |               |              |                      |                  |                             |                         |                              |                          |                              |                                               |
|-------------------------------------------------------------------------------------------------------------------------------------------------------------------------------------------------------------------------------------------------------------------------------------------------------|--------------------|---------------|--------------|----------------------|------------------|-----------------------------|-------------------------|------------------------------|--------------------------|------------------------------|-----------------------------------------------|
| Nr of participants (studies) Follow-up                                                                                                                                                                                                                                                                | Quality assessment |               |              |                      |                  |                             | Summary of Findings     |                              |                          |                              |                                               |
|                                                                                                                                                                                                                                                                                                       | Risk of bias       | Inconsistency | Indirectness | Imprecision          | Publication bias | Overall quality of evidence | Study event rates       |                              | Relative effect (95% CI) | Anticipated absolute effects |                                               |
|                                                                                                                                                                                                                                                                                                       |                    |               |              |                      |                  |                             | Risk with control group | Risk with intervention group |                          | Risk with control group      | Risk difference with intervention group       |
| <b>Clinical response (critical outcome)</b>                                                                                                                                                                                                                                                           |                    |               |              |                      |                  |                             |                         |                              |                          |                              |                                               |
| N: 105 (1 study) 6 weeks                                                                                                                                                                                                                                                                              | Not serious        | N/A           | Not serious  | Serious <sup>1</sup> | N/A              | Moderate                    | 31/58 (53.4%)           | 44/47 (93.6%)                | RR, 1.75 (1.36–2.25)     | 534 per 1000                 | 401 more per 1000 (from 192 more to 668 more) |
| <b>Clinical remission (critical outcome)</b>                                                                                                                                                                                                                                                          |                    |               |              |                      |                  |                             |                         |                              |                          |                              |                                               |
| N: 267 (2 studies) 6–17 weeks                                                                                                                                                                                                                                                                         | Not serious        | Not serious   | Not serious  | Serious <sup>2</sup> | Undetected       | Moderate                    | 42/135 (31.1%)          | 79/132 (59.8%)               | RR, 1.99 (1.51–2.64)     | 311 per 1000                 | 308 more per 1000 (from 159 more to 510 more) |
| <b>Any adverse events, AEs (critical outcome)</b>                                                                                                                                                                                                                                                     |                    |               |              |                      |                  |                             |                         |                              |                          |                              |                                               |
| N: 162 (1 study) 17 weeks                                                                                                                                                                                                                                                                             | Not serious        | N/A           | Not serious  | Serious <sup>3</sup> | N/A              | Moderate                    | 5/77 (6.5%)             | 27/85 (31.8%)                | RR, 4.89 (1.98–12.07)    | 65 per 1000                  | 253 more per 1,000 (from 64 more to 719 more) |
| <b>Reference:</b> Benchimol EI, Seow CH, Steinhart AH, Griffiths AM. Traditional corticosteroids for induction of remission in Crohn's disease. Cochrane Database of Systematic Reviews 2008: CD006792.                                                                                               |                    |               |              |                      |                  |                             |                         |                              |                          |                              |                                               |
| <b>Footnotes:</b><br><sup>1</sup> Sparse data (75 events).<br><sup>2</sup> Sparse data (121 events).<br><sup>3</sup> Sparse data (32 events) and very wide CI.                                                                                                                                        |                    |               |              |                      |                  |                             |                         |                              |                          |                              |                                               |
| <b>Comment:</b> Evidence was sought also for quality of life, PRO response, biochemical improvement, endoscopic improvement and serious adverse events; however, data were insufficient.                                                                                                              |                    |               |              |                      |                  |                             |                         |                              |                          |                              |                                               |
| <b>Abbreviations:</b> N/A, not applicable; RR, risk ratio; CI, confidence interval.                                                                                                                                                                                                                   |                    |               |              |                      |                  |                             |                         |                              |                          |                              |                                               |

### Summary of Findings Table 5 (Azathioprine or Mercaptopurine (Thiopurines) versus no treatment)

| <b>PICO question:</b> Azathioprine or Mercaptopurine (Thiopurines) vs. no treatment                                                                                                                                           |                    |                      |              |                           |                  |                             |                         |                              |                          |                              |                                                |
|-------------------------------------------------------------------------------------------------------------------------------------------------------------------------------------------------------------------------------|--------------------|----------------------|--------------|---------------------------|------------------|-----------------------------|-------------------------|------------------------------|--------------------------|------------------------------|------------------------------------------------|
| <b>P:</b> Adult patients, Crohn's disease with moderate to severe activity, small and/or large intestinal                                                                                                                     |                    |                      |              |                           |                  |                             |                         |                              |                          |                              |                                                |
| <b>I:</b> Azathioprine or Mercaptopurine (Thiopurines)                                                                                                                                                                        |                    |                      |              |                           |                  |                             |                         |                              |                          |                              |                                                |
| <b>C:</b> No treatment                                                                                                                                                                                                        |                    |                      |              |                           |                  |                             |                         |                              |                          |                              |                                                |
| Nr of participants (studies) Follow-up                                                                                                                                                                                        | Quality assessment |                      |              |                           |                  |                             | Summary of Findings     |                              |                          |                              |                                                |
|                                                                                                                                                                                                                               | Risk of bias       | Inconsistency        | Indirectness | Imprecision               | Publication bias | Overall quality of evidence | Study event rates       |                              | Relative effect (95% CI) | Anticipated absolute effects |                                                |
|                                                                                                                                                                                                                               |                    |                      |              |                           |                  |                             | Risk with control group | Risk with intervention group |                          | Risk with control group      | Risk difference with intervention group        |
| <b>Clinical response (critical outcome)</b>                                                                                                                                                                                   |                    |                      |              |                           |                  |                             |                         |                              |                          |                              |                                                |
| N: 73 (3 studies) 8–24 weeks                                                                                                                                                                                                  | Not serious        | Serious <sup>1</sup> | Not serious  | Very serious <sup>2</sup> | Undetected       | Very low                    | 7/26 (26.9%)            | 12/28 (42.9%)                | RR, 1.87 (0.44–7.96)     | 269 per 1000                 | 234 more per 1000 (from 151 fewer to 731 more) |
| <b>Clinical remission (critical outcome)</b>                                                                                                                                                                                  |                    |                      |              |                           |                  |                             |                         |                              |                          |                              |                                                |
| N: 380 (5 studies) 12–17 weeks                                                                                                                                                                                                | Not serious        | Not serious          | Not serious  | Serious <sup>3</sup>      | Undetected       | Moderate                    | 68/183 (37.2%)          | 95/197 (48.2%)               | RR, 1.23 (0.97–1.55)     | 372 per 1000                 | 85 more per 1000 (from 11 fewer to 204 more)   |
| <b>Any adverse events, AEs (critical outcome)</b>                                                                                                                                                                             |                    |                      |              |                           |                  |                             |                         |                              |                          |                              |                                                |
| N: 80 (1 study)                                                                                                                                                                                                               | Not serious        | N/A                  | Not serious  | Serious <sup>4</sup>      | Undetected       | Moderate                    | 24/28 (85.7%)           | 36/52 (69.2%)                | RR, 0.81 (0.64–1.02)     | 857 per 1000                 | 163 fewer per 1000 (from 17 more to 309 fewer) |
| <b>Serious adverse events, SAEs (critical outcome)</b>                                                                                                                                                                        |                    |                      |              |                           |                  |                             |                         |                              |                          |                              |                                                |
| N: 216 (2 studies)                                                                                                                                                                                                            | Not serious        | Not serious          | Not serious  | Very serious <sup>5</sup> | Undetected       | Low                         | 4/105 (3.8%)            | 15/111 (13.5%)               | RR, 2.57 (0.92–7.13)     | 38 per 1000                  | 60 more per 1000 (from 3 fewer to 234 more)    |
| <b>Reference:</b> Chande N, Townsend CM, Parker CE, MacDonald JK. Azathioprine or 6-mercaptopurine for induction of remission in Crohn's disease. Cochrane Database of Systematic Reviews 2016, Issue 10. Art. No.: CD000545. |                    |                      |              |                           |                  |                             |                         |                              |                          |                              |                                                |
| <b>Footnotes:</b>                                                                                                                                                                                                             |                    |                      |              |                           |                  |                             |                         |                              |                          |                              |                                                |
| <sup>1</sup> Heterogeneity: I <sup>2</sup> = 69%                                                                                                                                                                              |                    |                      |              |                           |                  |                             |                         |                              |                          |                              |                                                |
| <sup>2</sup> Sparse data (19 events) and very wide CIs                                                                                                                                                                        |                    |                      |              |                           |                  |                             |                         |                              |                          |                              |                                                |
| <sup>3</sup> Sparse data (163 events)                                                                                                                                                                                         |                    |                      |              |                           |                  |                             |                         |                              |                          |                              |                                                |
| <sup>4</sup> Sparse data (60 events)                                                                                                                                                                                          |                    |                      |              |                           |                  |                             |                         |                              |                          |                              |                                                |
| <sup>5</sup> Sparse data (19 events) and very wide CIs                                                                                                                                                                        |                    |                      |              |                           |                  |                             |                         |                              |                          |                              |                                                |
| <b>Comment:</b> We also searched for evidence regarding PRO response, PRO remission, biochemical improvement, endoscopic improvement, and radiologic improvement; however, data were insufficient.                            |                    |                      |              |                           |                  |                             |                         |                              |                          |                              |                                                |
| <b>Abbreviations:</b> N/A, not applicable; RR, risk ratio; CI, confidence interval.                                                                                                                                           |                    |                      |              |                           |                  |                             |                         |                              |                          |                              |                                                |

### Summary of Findings Table 6 (Methotrexate versus no treatment)

| <b>PICO question:</b> Methotrexate vs. no treatment<br><b>P:</b> Adult patients, Crohn's disease with moderate to severe activity, small and/or large intestinal<br><b>I:</b> Methotrexate<br><b>C:</b> No treatment or placebo                                                                                     |                    |               |              |                           |                  |                             |                         |                              |                          |                              |                                              |
|---------------------------------------------------------------------------------------------------------------------------------------------------------------------------------------------------------------------------------------------------------------------------------------------------------------------|--------------------|---------------|--------------|---------------------------|------------------|-----------------------------|-------------------------|------------------------------|--------------------------|------------------------------|----------------------------------------------|
| Nr of participants (studies) Follow-up                                                                                                                                                                                                                                                                              | Quality assessment |               |              |                           |                  |                             | Summary of Findings     |                              |                          |                              |                                              |
|                                                                                                                                                                                                                                                                                                                     | Risk of bias       | Inconsistency | Indirectness | Imprecision               | Publication bias | Overall quality of evidence | Study event rates       |                              | Relative effect (95% CI) | Anticipated absolute effects |                                              |
|                                                                                                                                                                                                                                                                                                                     |                    |               |              |                           |                  |                             | Risk with control group | Risk with intervention group |                          | Risk with control group      | Risk difference with intervention group      |
| <b>Clinical remission (critical outcome)</b>                                                                                                                                                                                                                                                                        |                    |               |              |                           |                  |                             |                         |                              |                          |                              |                                              |
| N: 141 (1 study) 16 weeks                                                                                                                                                                                                                                                                                           | Not serious        | N/A           | Not serious  | Serious <sup>1</sup>      | N/A              | Moderate                    | 9/47 (19.1%)            | 37/94 (39.4%)                | RR, 2.06 (1.09–3.89)     | 191 per 1000                 | 202 more per 1000 (from 16 more to 554 more) |
| <b>Withdrawal due to adverse events (critical outcome)</b>                                                                                                                                                                                                                                                          |                    |               |              |                           |                  |                             |                         |                              |                          |                              |                                              |
| N: 141 (1 study) 16 weeks                                                                                                                                                                                                                                                                                           | Not serious        | N/A           | Not serious  | Very serious <sup>2</sup> | N/A              | Low                         | 1/47 (2.1%)             | 16/94 (17.0%)                | RR, 8.00 (1.09–58.51)    | 21 per 1000                  | 149 more per 1000 (from 2 more to 979 more)  |
| <b>Reference:</b> Feagan BG, Rochon J, Fedorak RN, Irvine EJ, Wild G, Sutherland L, Steinhart AH, Greenberg GR, Gillies R, Hopkins M, et al. Methotrexate for the treatment of Crohn's disease. The North American Crohn's Study Group Investigators. <i>New England Journal of Medicine</i> 1995; 332(5): 292–297. |                    |               |              |                           |                  |                             |                         |                              |                          |                              |                                              |
| <b>Footnotes:</b><br><sup>1</sup> Sparse data (46 events)<br><sup>2</sup> Sparse data (17 events) and very wide CIs                                                                                                                                                                                                 |                    |               |              |                           |                  |                             |                         |                              |                          |                              |                                              |
| <b>Comment:</b> We also searched for evidence regarding PRO response, PRO remission, biochemical improvement, endoscopic improvement, and radiologic improvement; however, data were insufficient.                                                                                                                  |                    |               |              |                           |                  |                             |                         |                              |                          |                              |                                              |
| <b>Abbreviations:</b> N/A, not applicable; RR, risk ratio; CI, confidence interval.                                                                                                                                                                                                                                 |                    |               |              |                           |                  |                             |                         |                              |                          |                              |                                              |

## Summary of Findings Table 7 (Methotrexate versus thiopurine)

| <b>PICO question:</b> Methotrexate vs. thiopurine<br><b>P:</b> Adult patients, Crohn's disease with moderate to severe activity, small and/or large intestinal<br><b>I:</b> Methotrexate<br><b>C:</b> AZA/6-MP                                                                                                                     |                      |               |              |                      |                  |                             |                         |                              |                          |                              |                                               |
|------------------------------------------------------------------------------------------------------------------------------------------------------------------------------------------------------------------------------------------------------------------------------------------------------------------------------------|----------------------|---------------|--------------|----------------------|------------------|-----------------------------|-------------------------|------------------------------|--------------------------|------------------------------|-----------------------------------------------|
| Nr of participants (studies)<br>Follow-up                                                                                                                                                                                                                                                                                          | Quality assessment   |               |              |                      |                  |                             | Summary of Findings     |                              |                          |                              |                                               |
|                                                                                                                                                                                                                                                                                                                                    | Risk of bias         | Inconsistency | Indirectness | Imprecision          | Publication bias | Overall quality of evidence | Study event rates       |                              | Relative effect (95% CI) | Anticipated absolute effects |                                               |
|                                                                                                                                                                                                                                                                                                                                    |                      |               |              |                      |                  |                             | Risk with control group | Risk with intervention group |                          | Risk with control group      | Risk difference with intervention group       |
| <b>Clinical remission (critical outcome)</b>                                                                                                                                                                                                                                                                                       |                      |               |              |                      |                  |                             |                         |                              |                          |                              |                                               |
| N: 143<br>(3 studies)<br>24–36 weeks                                                                                                                                                                                                                                                                                               | Serious <sup>1</sup> | Not serious   | Not serious  | Serious <sup>2</sup> | Undetected       | Low                         | 45/75 (60.0%)           | 37/68 (54.4%)                | RR, 0.87<br>(0.70–1.09)  | 600 per 1000                 | 77 fewer per 1000 (from 182 fewer to 54 more) |
| <b>Any adverse events, AEs (critical outcome)</b>                                                                                                                                                                                                                                                                                  |                      |               |              |                      |                  |                             |                         |                              |                          |                              |                                               |
| N: 54<br>(1 study)<br>24 weeks                                                                                                                                                                                                                                                                                                     | Serious <sup>3</sup> | N/A           | Not serious  | Serious <sup>4</sup> | N/A              | Low                         | 7/27 (25.9%)            | 17/27 (63.0%)                | RR, 2.43<br>(1.21–4.89)  | 259 per 1000                 | 371 more per 1000 (from 54 more to 741 more)  |
| <b>Reference:</b> McDonald JWD, Wang Y, Tsoulis DJ, MacDonald JK, Feagan BG. Methotrexate for induction of remission in refractory Crohn's disease. Cochrane Database of Systematic Reviews 2014, Issue 8. Art. No. CD003459.                                                                                                      |                      |               |              |                      |                  |                             |                         |                              |                          |                              |                                               |
| <b>Footnotes:</b><br><sup>1</sup> Methods of allocation concealment were unclear in all 3 studies, and problems with blinding existed in 2 studies<br><sup>2</sup> Sparse data (82 events)<br><sup>3</sup> Rated as high risk of bias for blinding (investigator blind design)<br><sup>4</sup> Sparse data (24 events) and wide CI |                      |               |              |                      |                  |                             |                         |                              |                          |                              |                                               |
| <b>Comment:</b> We also searched for evidence regarding PRO response and remission, biochemical, endoscopic and radiologic improvement, serious adverse events, and quality of life; however, data were insufficient.                                                                                                              |                      |               |              |                      |                  |                             |                         |                              |                          |                              |                                               |
| <b>Abbreviations:</b> N/A, not applicable; RR, risk ratio; CI, confidence interval.                                                                                                                                                                                                                                                |                      |               |              |                      |                  |                             |                         |                              |                          |                              |                                               |

### Summary of Findings Table 8 (TNF inhibitor (Infliximab or adalimumab or certolizumab) versus placebo)

| PICO question: TNF inhibitor (infliximab or adalimumab or certolizumab) vs placebo                                                                                                                                                                                                                                |                    |                      |              |                           |                  |                             |                         |                              |                          |                              |                                               |
|-------------------------------------------------------------------------------------------------------------------------------------------------------------------------------------------------------------------------------------------------------------------------------------------------------------------|--------------------|----------------------|--------------|---------------------------|------------------|-----------------------------|-------------------------|------------------------------|--------------------------|------------------------------|-----------------------------------------------|
| P: Adult patients, Crohn's disease with moderate to severe activity, with inadequate response to conventional therapy                                                                                                                                                                                             |                    |                      |              |                           |                  |                             |                         |                              |                          |                              |                                               |
| I: TNF inhibitor (infliximab or adalimumab or certolizumab)                                                                                                                                                                                                                                                       |                    |                      |              |                           |                  |                             |                         |                              |                          |                              |                                               |
| C: No treatment or placebo                                                                                                                                                                                                                                                                                        |                    |                      |              |                           |                  |                             |                         |                              |                          |                              |                                               |
| Nr of participants (studies) Follow-up                                                                                                                                                                                                                                                                            | Quality assessment |                      |              |                           |                  |                             | Summary of Findings     |                              |                          |                              |                                               |
|                                                                                                                                                                                                                                                                                                                   | Risk of bias       | Inconsistency        | Indirectness | Imprecision               | Publication bias | Overall quality of evidence | Study event rates       |                              | Relative effect (95% CI) | Anticipated absolute effects |                                               |
|                                                                                                                                                                                                                                                                                                                   |                    |                      |              |                           |                  |                             | Risk with control group | Risk with intervention group |                          | Risk with control group      | Risk difference with intervention group       |
| <b>Clinical remission (critical outcome)</b>                                                                                                                                                                                                                                                                      |                    |                      |              |                           |                  |                             |                         |                              |                          |                              |                                               |
| N: 1771 (6 studies) 4–12 weeks                                                                                                                                                                                                                                                                                    | Not serious        | Serious <sup>1</sup> | Not serious  | Not serious               | Undetected       | Moderate                    | 150/882 (17.0%)         | 227/889 (25.5%)              | RR, 1.66 (1.17–2.36)     | 170 per 1000                 | 112 more per 1000 (from 29 more to 231 more)  |
| <b>Clinical response (critical outcome)</b>                                                                                                                                                                                                                                                                       |                    |                      |              |                           |                  |                             |                         |                              |                          |                              |                                               |
| N: 1771 (6 studies) 4–12 weeks                                                                                                                                                                                                                                                                                    | Not serious        | Not serious          | Not serious  | Not serious               | Undetected       | High                        | 246/882 (27.9%)         | 346/889 (38.9%)              | RR, 1.43 (1.17–1.73)     | 279 per 1000                 | 120 more per 1000 (from 47 more to 204 more)  |
| <b>Endoscopic improvement (important outcome)</b>                                                                                                                                                                                                                                                                 |                    |                      |              |                           |                  |                             |                         |                              |                          |                              |                                               |
| N: 171 (2 studies) 10–12 weeks                                                                                                                                                                                                                                                                                    | Not serious        | Not serious          | Not serious  | Very serious <sup>2</sup> | Undetected       | Low                         | 8/77 (10.4%)            | 27/94 (28.7%)                | RR, 3.25 (0.53–19.8)     | 104 per 1000                 | 233 more per 1000 (from 49 fewer to 896 more) |
| <b>Adverse events (critical outcome)</b>                                                                                                                                                                                                                                                                          |                    |                      |              |                           |                  |                             |                         |                              |                          |                              |                                               |
| N: 2219 (7 studies) 4–12 weeks                                                                                                                                                                                                                                                                                    | Not serious        | N/R                  | Not serious  | Not serious               | Undetected       | High                        | 630/940 (67.0%)         | 863/1279 (67.5%)             | RR, 0.99 (0.90–1.08)     | 670 per 1000                 | 7 fewer per 1000 (from 67 fewer to 54 more)   |
| <b>References:</b>                                                                                                                                                                                                                                                                                                |                    |                      |              |                           |                  |                             |                         |                              |                          |                              |                                               |
| -- Stidham R, Lee T, Higgins P, et al. Systematic review with network meta-analysis: the efficacy of anti-TNF agents for the treatment of Crohn's disease. <i>Alimentary Pharmacology &amp; Therapeutics</i> 2014; 39(12): 1349–1362.                                                                             |                    |                      |              |                           |                  |                             |                         |                              |                          |                              |                                               |
| -- Cholanpranee A, Hazlewood G, Kaplan G, et al. Systematic review with meta-analysis: comparative efficacy of biologics for induction and maintenance of mucosal healing in Crohn's disease and ulcerative colitis controlled trials. <i>Alimentary Pharmacology &amp; Therapeutics</i> 2017; 45(10): 1291–1302. |                    |                      |              |                           |                  |                             |                         |                              |                          |                              |                                               |
| -- Ford A, Sandborn W, Khan K, et al. Efficacy of biological therapies in inflammatory bowel disease: systematic review and meta-analysis. <i>American Journal of Gastroenterology</i> 2011; 106(4): 644–659.                                                                                                     |                    |                      |              |                           |                  |                             |                         |                              |                          |                              |                                               |
| <b>Footnotes:</b>                                                                                                                                                                                                                                                                                                 |                    |                      |              |                           |                  |                             |                         |                              |                          |                              |                                               |
| <sup>1</sup> Heterogeneity: I <sup>2</sup> = 63.5%                                                                                                                                                                                                                                                                |                    |                      |              |                           |                  |                             |                         |                              |                          |                              |                                               |
| <sup>2</sup> Sparse data (35 events) and very wide CI                                                                                                                                                                                                                                                             |                    |                      |              |                           |                  |                             |                         |                              |                          |                              |                                               |
| <b>Comment:</b> Evidence was sought also for PRO response and remission, biochemical and radiologic improvement, and quality of life; however, data were insufficient.                                                                                                                                            |                    |                      |              |                           |                  |                             |                         |                              |                          |                              |                                               |
| <b>Abbreviations:</b> TNF, tumor necrosis factor; N/R, not reported; RR, risk ratio; CI, confidence interval.                                                                                                                                                                                                     |                    |                      |              |                           |                  |                             |                         |                              |                          |                              |                                               |

### Summary of Findings Table 9 (Adalimumab with thiopurine versus adalimumab without thiopurine)

| <b>PICO question:</b> TNF inhibitor with thiopurine vs TNF inhibitor without thiopurine<br><b>P:</b> Adult patients, Crohn's disease with moderate to severe activity, with inadequate response to conventional therapy<br><b>I:</b> TNF inhibitor ( <b>adalimumab</b> ) with thiopurine<br><b>C:</b> TNF inhibitor ( <b>adalimumab</b> ) without thiopurine |                    |               |              |                      |                  |                             |                         |                              |                          |                              |                                                |
|--------------------------------------------------------------------------------------------------------------------------------------------------------------------------------------------------------------------------------------------------------------------------------------------------------------------------------------------------------------|--------------------|---------------|--------------|----------------------|------------------|-----------------------------|-------------------------|------------------------------|--------------------------|------------------------------|------------------------------------------------|
| Nr of participants (studies) Follow-up                                                                                                                                                                                                                                                                                                                       | Quality assessment |               |              |                      |                  |                             | Summary of Findings     |                              |                          |                              |                                                |
|                                                                                                                                                                                                                                                                                                                                                              | Risk of bias       | Inconsistency | Indirectness | Imprecision          | Publication bias | Overall quality of evidence | Study event rates       |                              | Relative effect (95% CI) | Anticipated absolute effects |                                                |
|                                                                                                                                                                                                                                                                                                                                                              |                    |               |              |                      |                  |                             | Risk with control group | Risk with intervention group |                          | Risk with control group      | Risk difference with intervention group        |
| <b>Clinical remission (critical outcome)</b>                                                                                                                                                                                                                                                                                                                 |                    |               |              |                      |                  |                             |                         |                              |                          |                              |                                                |
| N: 176 (1 study) 26 weeks                                                                                                                                                                                                                                                                                                                                    | Not serious        | N/A           | Not serious  | Not serious          | N/A              | High                        | 61/85 (71.8%)           | 62/91 (68.1%)                | RR, 0.95 (0.78–1.15)     | 718 per 1000                 | 36 fewer per 1000 (from 156 fewer to 109 more) |
| <b>Endoscopic improvement (important outcome)</b>                                                                                                                                                                                                                                                                                                            |                    |               |              |                      |                  |                             |                         |                              |                          |                              |                                                |
| N: 115 (1 study) 26 weeks                                                                                                                                                                                                                                                                                                                                    | Not serious        | N/A           | Not serious  | Serious <sup>1</sup> | N/A              | Moderate                    | 37/58 (63.8%)           | 48/57 (84.2%)                | RR, 1.32 (1.06–1.65)     | 638 per 1000                 | 204 more per 1000 (from 35 more to 362 more)   |
| <b>Adverse events leading to drug discontinuation (critical outcome)</b>                                                                                                                                                                                                                                                                                     |                    |               |              |                      |                  |                             |                         |                              |                          |                              |                                                |
| N: 176 (1 study) 52 weeks                                                                                                                                                                                                                                                                                                                                    | Not serious        | N/A           | Not serious  | Serious <sup>2</sup> | N/A              | Moderate                    | 19/85 (22.4%)           | 21/91 (23.1%)                | RR, 1.03 (0.60–1.78)     | 224 per 1000                 | 7 more per 1000 (from 90 fewer to 175 more)    |
| <b>Reference:</b> Matsumoto T, et al. Adalimumab monotherapy and a combination with azathioprine for Crohn's disease: a prospective, randomized trial. <i>Journal of Crohn's and Colitis</i> 2016; 10: 1259–1266.                                                                                                                                            |                    |               |              |                      |                  |                             |                         |                              |                          |                              |                                                |
| <b>Footnotes:</b><br><sup>1</sup> Sparse data (85 events)<br><sup>2</sup> Sparse data (40 events)                                                                                                                                                                                                                                                            |                    |               |              |                      |                  |                             |                         |                              |                          |                              |                                                |
| <b>Comment:</b> Evidence was sought also for clinical response, PRO response and remission, biochemical improvement, quality of life, adverse events, and serious adverse events; however, data were insufficient.                                                                                                                                           |                    |               |              |                      |                  |                             |                         |                              |                          |                              |                                                |
| <b>Abbreviations:</b> TNF, tumor necrosis factor; N/A, not applicable; RR, risk ratio; CI, confidence interval.                                                                                                                                                                                                                                              |                    |               |              |                      |                  |                             |                         |                              |                          |                              |                                                |

### Summary of Findings Table 10 (Infliximab with thiopurine versus Infliximab without thiopurine)

| <b>PICO question:</b> TNF inhibitor with thiopurine vs TNF inhibitor without thiopurine<br><b>P:</b> Adult patients, Crohn's disease with moderate to severe activity, with inadequate response to conventional therapy<br><b>I:</b> TNF inhibitor ( <b>infliximab</b> ) with thiopurine<br><b>C:</b> TNF inhibitor ( <b>infliximab</b> ) without thiopurine |                    |               |              |                      |                  |                             |                         |                              |                          |                              |                                               |
|--------------------------------------------------------------------------------------------------------------------------------------------------------------------------------------------------------------------------------------------------------------------------------------------------------------------------------------------------------------|--------------------|---------------|--------------|----------------------|------------------|-----------------------------|-------------------------|------------------------------|--------------------------|------------------------------|-----------------------------------------------|
| Nr of participants (studies) Follow-up                                                                                                                                                                                                                                                                                                                       | Quality assessment |               |              |                      |                  |                             | Summary of Findings     |                              |                          |                              |                                               |
|                                                                                                                                                                                                                                                                                                                                                              | Risk of bias       | Inconsistency | Indirectness | Imprecision          | Publication bias | Overall quality of evidence | Study event rates       |                              | Relative effect (95% CI) | Anticipated absolute effects |                                               |
|                                                                                                                                                                                                                                                                                                                                                              |                    |               |              |                      |                  |                             | Risk with control group | Risk with intervention group |                          | Risk with control group      | Risk difference with intervention group       |
| <b>Clinical remission (critical outcome)</b>                                                                                                                                                                                                                                                                                                                 |                    |               |              |                      |                  |                             |                         |                              |                          |                              |                                               |
| N: 338 (1 study) 26 weeks                                                                                                                                                                                                                                                                                                                                    | Not serious        | N/A           | Not serious  | Not serious          | N/A              | High                        | 75/169 (44.4%)          | 96/169 (56.8%)               | RR, 1.28 (1.03–1.59)     | 444 per 1000                 | 124 more per 1000 (from 15 more to 260 more)  |
| <b>Endoscopic improvement (important outcome)</b>                                                                                                                                                                                                                                                                                                            |                    |               |              |                      |                  |                             |                         |                              |                          |                              |                                               |
| N: 200 (1 study) 26 weeks                                                                                                                                                                                                                                                                                                                                    | Not serious        | N/A           | Not serious  | Serious <sup>1</sup> | N/A              | Moderate                    | 28/93 (30.1%)           | 47/107 (43.9%)               | RR, 1.46 (1.00–2.13)     | 301 per 1000                 | 138 more per 1000 (from 0 more to 339 more)   |
| <b>Adverse events, AEs (critical outcome)</b>                                                                                                                                                                                                                                                                                                                |                    |               |              |                      |                  |                             |                         |                              |                          |                              |                                               |
| N: 342 (1 study) N/R                                                                                                                                                                                                                                                                                                                                         | Not serious        | N/A           | Not serious  | Not serious          | N/A              | High                        | 145/163 (89.0%)         | 161/179 (89.9%)              | RR, 1.01 (0.94–1.09)     | 890 per 1000                 | 10 more per 1000 (from 53 fewer to 78 more)   |
| <b>Serious adverse events, SAEs (critical outcome)</b>                                                                                                                                                                                                                                                                                                       |                    |               |              |                      |                  |                             |                         |                              |                          |                              |                                               |
| N: 342 (1 study) 52 weeks                                                                                                                                                                                                                                                                                                                                    | Not serious        | N/A           | Not serious  | Serious <sup>2</sup> | N/A              | Moderate                    | 39/163 (23.9%)          | 27/179 (15.1%)               | RR, 0.63 (0.41–0.98)     | 239 per 1000                 | 88 fewer per 1000 (from 4 fewer to 142 fewer) |
| <b>Reference:</b> Colombel JF, et al. Infliximab, azathioprine, or combination therapy for Crohn's disease. <i>New England Journal of Medicine</i> 2010; 362: 1383–1395.                                                                                                                                                                                     |                    |               |              |                      |                  |                             |                         |                              |                          |                              |                                               |
| <b>Footnotes:</b><br><sup>1</sup> Sparse data (75 events)<br><sup>2</sup> Sparse data (66 events)                                                                                                                                                                                                                                                            |                    |               |              |                      |                  |                             |                         |                              |                          |                              |                                               |
| <b>Comment:</b> Evidence was sought also for clinical response, PRO remission and response, biochemical improvement, and quality of life; however, data were insufficient.                                                                                                                                                                                   |                    |               |              |                      |                  |                             |                         |                              |                          |                              |                                               |
| <b>Abbreviations:</b> TNF, tumor necrosis factor; N/A, not applicable; RR, risk ratio; CI, confidence interval.                                                                                                                                                                                                                                              |                    |               |              |                      |                  |                             |                         |                              |                          |                              |                                               |

## Summary of Findings Table 11 (Ustekinumab versus placebo)

| <b>PICO question:</b> Ustekinumab vs placebo<br><b>P:</b> Adult patients, Crohn's disease with moderate to severe activity, ileal and/or colonic, with inadequate response to conventional therapy<br><b>I:</b> Ustekinumab<br><b>C:</b> No treatment or placebo                                                                                                                                         |                    |               |              |                      |                  |                             |                         |                              |                          |                              |                                               |
|----------------------------------------------------------------------------------------------------------------------------------------------------------------------------------------------------------------------------------------------------------------------------------------------------------------------------------------------------------------------------------------------------------|--------------------|---------------|--------------|----------------------|------------------|-----------------------------|-------------------------|------------------------------|--------------------------|------------------------------|-----------------------------------------------|
| Nr of participants (studies) Follow-up                                                                                                                                                                                                                                                                                                                                                                   | Quality assessment |               |              |                      |                  |                             | Summary of Findings     |                              |                          |                              |                                               |
|                                                                                                                                                                                                                                                                                                                                                                                                          | Risk of bias       | Inconsistency | Indirectness | Imprecision          | Publication bias | Overall quality of evidence | Study event rates       |                              | Relative effect (95% CI) | Anticipated absolute effects |                                               |
|                                                                                                                                                                                                                                                                                                                                                                                                          |                    |               |              |                      |                  |                             | Risk with control group | Risk with intervention group |                          | Risk with control group      | Risk difference with intervention group       |
| <b>Clinical remission (critical outcome)</b>                                                                                                                                                                                                                                                                                                                                                             |                    |               |              |                      |                  |                             |                         |                              |                          |                              |                                               |
| N: 1947 (4 studies) 6 weeks                                                                                                                                                                                                                                                                                                                                                                              | Not serious        | Not serious   | Not serious  | Not serious          | Undetected       | High                        | 76/615 (12.4%)          | 283/1332 (21.2%)             | RR, 1.76 (1.40–2.22)     | 124 per 1000                 | 94 more per 1000 (from 49 more to 151 more)   |
| <b>Clinical response (critical outcome)</b>                                                                                                                                                                                                                                                                                                                                                              |                    |               |              |                      |                  |                             |                         |                              |                          |                              |                                               |
| N: 1947 (4 studies) 6 weeks                                                                                                                                                                                                                                                                                                                                                                              | Not serious        | Not serious   | Not serious  | Not serious          | Undetected       | High                        | 200/615 (32.5%)         | 670/1332 (50.3%)             | RR, 1.56 (1.38–1.77)     | 325 per 1000                 | 183 more per 1000 (from 123 more to 250 more) |
| <b>Endoscopic improvement (important outcome)</b>                                                                                                                                                                                                                                                                                                                                                        |                    |               |              |                      |                  |                             |                         |                              |                          |                              |                                               |
| N: 252 (2 studies) 8 weeks                                                                                                                                                                                                                                                                                                                                                                               | Not serious        | N/A           | Not serious  | Serious <sup>1</sup> | N/A              | Moderate                    | 29/97 (29.9%)           | 74/155 (47.7%)               | RR, 1.60 (1.13–2.26)     | 299 per 1000                 | 178 more per 1000 (from 39 more to 376 more)  |
| <b>Adverse events, AEs (critical outcome)</b>                                                                                                                                                                                                                                                                                                                                                            |                    |               |              |                      |                  |                             |                         |                              |                          |                              |                                               |
| N: 2024 (4 studies) 8 weeks                                                                                                                                                                                                                                                                                                                                                                              | Not serious        | Not serious   | Not serious  | Not serious          | Undetected       | High                        | 407/637 (63.9%)         | 860/1387 (62.0%)             | RR, 0.96 (0.90–1.03)     | 639 per 1000                 | 23 fewer per 1000 (from 64 fewer to 22 more)  |
| <b>Serious adverse events, SAEs (critical outcome)</b>                                                                                                                                                                                                                                                                                                                                                   |                    |               |              |                      |                  |                             |                         |                              |                          |                              |                                               |
| N: 1997 (4 studies) 8 weeks                                                                                                                                                                                                                                                                                                                                                                              | Not serious        | Not serious   | Not serious  | Not serious          | Undetected       | High                        | 41/637 (6.4%)           | 71/1360 (5.2%)               | RR, 0.79 (0.54–1.15)     | 64 per 1000                  | 14 fewer per 1000 (from 30 fewer to 10 more)  |
| <b>References:</b><br>-- MacDonald JK, Nguyen TM, Khanna R, et al. Anti-IL-12/23p40 antibodies for induction of remission in Crohn's disease. Cochrane Database of Systematic Reviews 2016, Issue 11. Art. No. CD007572.<br>-- Rutgeerts P, Gasink C, Chan D, et al. Efficacy of ustekinumab for inducing endoscopic healing in patients with Crohn's disease. Gastroenterology 2018; 155(4): 1045–1058. |                    |               |              |                      |                  |                             |                         |                              |                          |                              |                                               |
| <b>Footnote:</b><br><sup>1</sup> Sparse data (103 events)                                                                                                                                                                                                                                                                                                                                                |                    |               |              |                      |                  |                             |                         |                              |                          |                              |                                               |
| <b>Comment:</b> Evidence was sought also for PRO response and remission, biochemical improvement, and quality of life; however, data were insufficient.                                                                                                                                                                                                                                                  |                    |               |              |                      |                  |                             |                         |                              |                          |                              |                                               |
| <b>Abbreviations:</b> N/A, not applicable; RR, risk ratio; CI, confidence interval.                                                                                                                                                                                                                                                                                                                      |                    |               |              |                      |                  |                             |                         |                              |                          |                              |                                               |



## Summary of Findings Table 12 (Vedolizumab versus placebo)

| <b>PICO question:</b> Vedolizumab vs. placebo<br><b>P:</b> Adult patients, Crohn's Disease with moderate to severe activity, small and/or large intestine<br><b>I:</b> Vedolizumab<br><b>C:</b> No treatment or placebo                                                    |                    |               |              |                      |                  |                             |                         |                              |                          |                              |                                              |
|----------------------------------------------------------------------------------------------------------------------------------------------------------------------------------------------------------------------------------------------------------------------------|--------------------|---------------|--------------|----------------------|------------------|-----------------------------|-------------------------|------------------------------|--------------------------|------------------------------|----------------------------------------------|
| Nr of participants (studies) Follow-up                                                                                                                                                                                                                                     | Quality assessment |               |              |                      |                  |                             | Summary of Findings     |                              |                          |                              |                                              |
|                                                                                                                                                                                                                                                                            | Risk of bias       | Inconsistency | Indirectness | Imprecision          | Publication bias | Overall quality of evidence | Study event rates       |                              | Relative effect (95% CI) | Anticipated absolute effects |                                              |
|                                                                                                                                                                                                                                                                            |                    |               |              |                      |                  |                             | Risk with control group | Risk with intervention group |                          | Risk with control group      | Risk difference with intervention group      |
| <b>Clinical response (critical outcome)</b>                                                                                                                                                                                                                                |                    |               |              |                      |                  |                             |                         |                              |                          |                              |                                              |
| N: 969 (3 studies) 6–10 weeks                                                                                                                                                                                                                                              | Not serious        | Not serious   | Not serious  | Not serious          | Undetected       | High                        | 106/413 (25.7%)         | 227/556 (40.8%)              | RR, 1.55 (1.14–2.11)     | 257 per 1000                 | 141 more per 1000 (from 36 more to 285 more) |
| <b>Clinical remission (critical outcome)</b>                                                                                                                                                                                                                               |                    |               |              |                      |                  |                             |                         |                              |                          |                              |                                              |
| N: 969 (3 studies) 6–10 weeks                                                                                                                                                                                                                                              | Not serious        | Not serious   | Not serious  | Not serious          | Undetected       | High                        | 49/413 (11.9%)          | 135/556 (24.3%)              | RR, 2.01 (1.50–2.71)     | 119 per 1000                 | 120 more per 1000 (from 59 more to 203 more) |
| <b>Serious adverse events, SAEs (critical outcome)</b>                                                                                                                                                                                                                     |                    |               |              |                      |                  |                             |                         |                              |                          |                              |                                              |
| N: 969 (3 studies) 6–10 weeks                                                                                                                                                                                                                                              | Not serious        | Not serious   | Not serious  | Serious <sup>1</sup> | Undetected       | Moderate                    | 35/413 (8.5%)           | 49/556 (8.8%)                | RR, 0.94 (0.61–1.45)     | 85 per 1000                  | 5 fewer per 1000 (from 33 fewer to 42 more)  |
| <b>Reference:</b> Chandar AK, Singh S, Murad MH, Peyrin-Biroulet L, Loftus EV. Efficacy and safety of natalizumab and vedolizumab for the management of Crohn's disease: a systematic review and meta-analysis. <i>Inflammatory Bowel Diseases</i> 2015; 21(7): 1695-1708. |                    |               |              |                      |                  |                             |                         |                              |                          |                              |                                              |
| <b>Footnotes:</b><br><sup>1</sup> Sparse data (84 events)                                                                                                                                                                                                                  |                    |               |              |                      |                  |                             |                         |                              |                          |                              |                                              |
| <b>Comment:</b> Evidence was sought also for quality of life, PRO response, biochemical improvement, and endoscopic improvement; however, data were insufficient.                                                                                                          |                    |               |              |                      |                  |                             |                         |                              |                          |                              |                                              |
| <b>Abbreviations:</b> RR, risk ratio; CI, confidence interval.                                                                                                                                                                                                             |                    |               |              |                      |                  |                             |                         |                              |                          |                              |                                              |

### Summary of Findings Table 13 (Ustekinumab versus Vedolizumab)

| <b>PICO question:</b> Ustekinumab vs vedolizumab<br><b>P:</b> Adult patients, Crohn's disease with moderate to severe activity, with prior anti-TNF failure<br><b>I:</b> Ustekinumab<br><b>C:</b> Vedolizumab                                                                                                   |                    |               |                             |                      |                  |                             |                         |                              |                          |                              |                                               |
|-----------------------------------------------------------------------------------------------------------------------------------------------------------------------------------------------------------------------------------------------------------------------------------------------------------------|--------------------|---------------|-----------------------------|----------------------|------------------|-----------------------------|-------------------------|------------------------------|--------------------------|------------------------------|-----------------------------------------------|
| Nr of participants (studies) Follow-up                                                                                                                                                                                                                                                                          | Quality assessment |               |                             |                      |                  |                             | Summary of Findings     |                              |                          |                              |                                               |
|                                                                                                                                                                                                                                                                                                                 | Risk of bias       | Inconsistency | Indirectness                | Imprecision          | Publication bias | Overall quality of evidence | Study event rates       |                              | Relative effect (95% CI) | Anticipated absolute effects |                                               |
|                                                                                                                                                                                                                                                                                                                 |                    |               |                             |                      |                  |                             | Risk with control group | Risk with intervention group |                          | Risk with control group      | Risk difference with intervention group       |
| <b>Clinical remission (critical outcome)</b>                                                                                                                                                                                                                                                                    |                    |               |                             |                      |                  |                             |                         |                              |                          |                              |                                               |
| N: 1249 (4 studies) 6 weeks                                                                                                                                                                                                                                                                                     | Not serious        | Not serious   | Very serious <sup>1</sup>   | Serious <sup>2</sup> | N/A              | Very low                    | 35/263 (13.3%)          | 62/380 (16.3%)               | RR, 1.16 (0.54–2.48)     | 133 per 1000                 | 21 more per 1000 (from 61 fewer to 197 more)  |
| <b>Clinical response (critical outcome)</b>                                                                                                                                                                                                                                                                     |                    |               |                             |                      |                  |                             |                         |                              |                          |                              |                                               |
| N: 1249 (4 studies) 6 weeks                                                                                                                                                                                                                                                                                     | Not serious        | Not serious   | Very serious <sup>1,3</sup> | Serious <sup>2</sup> | N/A              | Very low                    | 87/263 (33.1%)          | 136/380 (35.8%)              | RR, 1.14 (0.65–1.99)     | 331 per 1000                 | 46 more per 1000 (from 116 fewer to 327 more) |
| <b>Adverse events, AEs (critical outcome)</b>                                                                                                                                                                                                                                                                   |                    |               |                             |                      |                  |                             |                         |                              |                          |                              |                                               |
| N: 1541 (4 studies) 6 weeks                                                                                                                                                                                                                                                                                     | Not serious        | Not serious   | Very serious <sup>1</sup>   | Serious <sup>2</sup> | N/A              | Very low                    | 241/429 (56.2%)         | 244/380 (64.2%)              | RR, 1.00 (0.82–1.23)     | 562 per 1000                 | 0 more per 1000 (from 101 fewer to 129 more)  |
| <b>Serious adverse events, SAEs (critical outcome)</b>                                                                                                                                                                                                                                                          |                    |               |                             |                      |                  |                             |                         |                              |                          |                              |                                               |
| N: 1541 (4 studies) 6 weeks                                                                                                                                                                                                                                                                                     | Not serious        | Not serious   | Very serious <sup>1</sup>   | Serious <sup>2</sup> | N/A              | Very low                    | 33/429 (7.7%)           | 27/380 (7.1%)                | RR, 0.95 (0.43–2.12)     | 77 per 1000                  | 4 fewer per 1000 (from 44 fewer to 86 more)   |
| <b>Reference:</b> Kawalec P, Moćko P. An indirect comparison of ustekinumab and vedolizumab in the therapy of TNF-failure Crohn's disease patients. <i>Journal of Comparative Effectiveness Research</i> 2018; 7(2): 101–111.                                                                                   |                    |               |                             |                      |                  |                             |                         |                              |                          |                              |                                               |
| <b>Footnotes:</b><br><sup>1</sup> Evidence comes from indirect treatment comparisons<br><sup>2</sup> Indirect treatment comparisons typically suffer from low power<br><sup>3</sup> Clinical response was defined as a $\geq 100$ point decrease in the Crohn's disease activity index (rather than $\geq 70$ ) |                    |               |                             |                      |                  |                             |                         |                              |                          |                              |                                               |
| <b>Comment:</b> Evidence was sought also for PRO response and remission, biochemical and endoscopic improvement, and quality of life; however, data were insufficient.                                                                                                                                          |                    |               |                             |                      |                  |                             |                         |                              |                          |                              |                                               |
| <b>Abbreviations:</b> TNF, tumor necrosis factor; N/A, not applicable; RR, risk ratio; CI, confidence interval.                                                                                                                                                                                                 |                    |               |                             |                      |                  |                             |                         |                              |                          |                              |                                               |

## Summary Of Findings Tables Referring To Maintenance Treatment Of Crohn's Disease (Section 2 In Manuscript)

**Summary of Findings Table 14** (5-aminosalicylates and sulphasalazine versus placebo)

| <b>PICO question:</b> Is treatment with 5-aminosalicylates effective for the maintenance of remission in patients with CD?<br><b>P:</b> CD patients in remission<br><b>I:</b> 5-ASA or sulphasalazine (all doses)<br><b>C:</b> No treatment OR placebo |                    |               |              |                           |                  |                             |                         |                              |                          |                              |                                             |
|--------------------------------------------------------------------------------------------------------------------------------------------------------------------------------------------------------------------------------------------------------|--------------------|---------------|--------------|---------------------------|------------------|-----------------------------|-------------------------|------------------------------|--------------------------|------------------------------|---------------------------------------------|
| Nr of participants (studies) Follow-up                                                                                                                                                                                                                 | Quality assessment |               |              |                           |                  |                             | Summary of Findings     |                              |                          |                              |                                             |
|                                                                                                                                                                                                                                                        | Risk of bias       | Inconsistency | Indirectness | Imprecision               | Publication bias | Overall quality of evidence | Study event rates       |                              | Relative effect (95% CI) | Anticipated absolute effects |                                             |
|                                                                                                                                                                                                                                                        |                    |               |              |                           |                  |                             | Risk with control group | Risk with intervention group |                          | Risk with control group      | Risk difference with intervention group     |
| <b>Clinical remission (critical outcome)</b>                                                                                                                                                                                                           |                    |               |              |                           |                  |                             |                         |                              |                          |                              |                                             |
| N: 2014 (11 studies) 12 months                                                                                                                                                                                                                         | Not serious        | Not serious   | Not serious  | Not serious               | Undetected       | High                        | 472/1016 (46.5%)        | 472/998 (47.3%)              | RR, 1.03 (0.92–1.16)     | 465 per 1000                 | 16 more per 1000 (from 35 fewer to 73 more) |
| <b>Serious adverse events, SAEs (critical outcome)</b>                                                                                                                                                                                                 |                    |               |              |                           |                  |                             |                         |                              |                          |                              |                                             |
| N: 445 (2 studies) 12 months                                                                                                                                                                                                                           | Not serious        | N/A           | Not serious  | Very serious <sup>1</sup> | N/A              | Low                         | 1/220 (0.5%)            | 2/225 (0.9%)                 | RR, 1.93 (0.18–21.1)     | 5 per 1000                   | 4 more per 1000 (from 4 fewer to 91 more)   |
| <b>Reference:</b> Akobeng AK, Zhang D, Gordon M, et al. Oral 5-aminosalicylic acid for maintenance of medically-induced remission in Crohn's disease. Cochrane Database of Systematic Reviews 2016; Issue 9. Art. No.: CD003715.                       |                    |               |              |                           |                  |                             |                         |                              |                          |                              |                                             |
| <b>Footnote:</b><br><sup>1</sup> Very sparse data (3 events)                                                                                                                                                                                           |                    |               |              |                           |                  |                             |                         |                              |                          |                              |                                             |
| <b>Comment:</b> Evidence was sought also for steroid-free clinical remission, endoscopic remission, PRO remission, radiological remission, biochemical remission and quality of life; however, data were insufficient.                                 |                    |               |              |                           |                  |                             |                         |                              |                          |                              |                                             |
| <b>Abbreviations:</b> CD, Crohn's disease; 5-ASA, 5-aminosalicylic acid; N/A, not applicable; RR, risk ratio; CI, confidence interval.                                                                                                                 |                    |               |              |                           |                  |                             |                         |                              |                          |                              |                                             |

**Summary of Findings Table 15** (Treatment with thiopurines for maintenance of remission in patients with steroid-dependent CD?)

| <b>PICO question:</b> Is treatment with thiopurines effective for the maintenance of remission in patients with steroid-dependent CD?<br><b>P:</b> Patients with steroid-dependent CD in remission<br><b>I:</b> Thiopurines (azathioprine or mercaptopurine)<br><b>C:</b> No treatment OR placebo                                                                                                                                                                                                                                                                                                    |                    |               |              |                      |                  |                             |                         |                              |                          |                              |                                              |
|------------------------------------------------------------------------------------------------------------------------------------------------------------------------------------------------------------------------------------------------------------------------------------------------------------------------------------------------------------------------------------------------------------------------------------------------------------------------------------------------------------------------------------------------------------------------------------------------------|--------------------|---------------|--------------|----------------------|------------------|-----------------------------|-------------------------|------------------------------|--------------------------|------------------------------|----------------------------------------------|
| Nr of participants (studies) Follow-up                                                                                                                                                                                                                                                                                                                                                                                                                                                                                                                                                               | Quality assessment |               |              |                      |                  |                             | Summary of Findings     |                              |                          |                              |                                              |
|                                                                                                                                                                                                                                                                                                                                                                                                                                                                                                                                                                                                      | Risk of bias       | Inconsistency | Indirectness | Imprecision          | Publication bias | Overall quality of evidence | Study event rates       |                              | Relative effect (95% CI) | Anticipated absolute effects |                                              |
|                                                                                                                                                                                                                                                                                                                                                                                                                                                                                                                                                                                                      |                    |               |              |                      |                  |                             | Risk with control group | Risk with intervention group |                          | Risk with control group      | Risk difference with intervention group      |
| <b>Clinical remission (critical outcome)</b>                                                                                                                                                                                                                                                                                                                                                                                                                                                                                                                                                         |                    |               |              |                      |                  |                             |                         |                              |                          |                              |                                              |
| N: 489 (6 studies) 6–18 months                                                                                                                                                                                                                                                                                                                                                                                                                                                                                                                                                                       | Not serious        | Not serious   | Not serious  | Not serious          | Undetected       | High                        | 166/269 (61.7%)         | 161/220 (73.2%)              | RR, 1.19 (1.05–1.34)     | 617 per 1000                 | 117 more per 1000 (from 31 more to 210 more) |
| <b>Serious adverse events, SAEs (critical outcome)</b>                                                                                                                                                                                                                                                                                                                                                                                                                                                                                                                                               |                    |               |              |                      |                  |                             |                         |                              |                          |                              |                                              |
| N: 556 (4 studies) 6–18 months                                                                                                                                                                                                                                                                                                                                                                                                                                                                                                                                                                       | Not serious        | Not serious   | Not serious  | Serious <sup>1</sup> | Undetected       | Moderate                    | 9/311 (2.9%)            | 22/245 (9.0%)                | RR, 2.45 (1.22–4.90)     | 29 per 1000                  | 42 more per 1000 (from 6 more to 113 more)   |
| <b>Reference:</b> Chande N, Patton PH, Tsoulis DJ, et al. Azathioprine or 6-mercaptopurine for maintenance of remission in Crohn's disease. Cochrane Database of Systematic Reviews 2015; Issue 10. Art. No.: CD000067.<br><b>Footnote:</b><br><sup>1</sup> Sparse data (31 events)<br><b>Comment:</b> Evidence was sought also for steroid-free clinical remission, endoscopic remission, PRO remission, radiological remission, biochemical remission and quality of life; however, data were insufficient.<br><b>Abbreviations:</b> CD, Crohn's disease; RR, risk ratio; CI, confidence interval. |                    |               |              |                      |                  |                             |                         |                              |                          |                              |                                              |

**Summary of Findings Table 16** (Treatment with thiopurines in newly diagnosed CD (i.e., early administration of azathioprine in patients without steroid-dependence))

| <b>PICO question:</b> Is treatment with thiopurines effective in newly diagnosed CD (i.e. early administration of azathioprine in patients without steroid-dependence)?                                            |                    |               |              |                           |                  |                             |                         |                              |                          |                              |                                               |
|--------------------------------------------------------------------------------------------------------------------------------------------------------------------------------------------------------------------|--------------------|---------------|--------------|---------------------------|------------------|-----------------------------|-------------------------|------------------------------|--------------------------|------------------------------|-----------------------------------------------|
| <b>P:</b> Patients with newly diagnosed CD, without steroid-dependence                                                                                                                                             |                    |               |              |                           |                  |                             |                         |                              |                          |                              |                                               |
| <b>I:</b> Thiopurines (azathioprine or mercaptopurine)                                                                                                                                                             |                    |               |              |                           |                  |                             |                         |                              |                          |                              |                                               |
| <b>C:</b> No treatment OR placebo                                                                                                                                                                                  |                    |               |              |                           |                  |                             |                         |                              |                          |                              |                                               |
| Nr of participants (studies) Follow-up                                                                                                                                                                             | Quality assessment |               |              |                           |                  |                             | Summary of Findings     |                              |                          |                              |                                               |
|                                                                                                                                                                                                                    | Risk of bias       | Inconsistency | Indirectness | Imprecision               | Publication bias | Overall quality of evidence | Study event rates       |                              | Relative effect (95% CI) | Anticipated absolute effects |                                               |
|                                                                                                                                                                                                                    |                    |               |              |                           |                  |                             | Risk with control group | Risk with intervention group |                          | Risk with control group      | Risk difference with intervention group       |
| <b>Clinical remission (critical outcome)</b>                                                                                                                                                                       |                    |               |              |                           |                  |                             |                         |                              |                          |                              |                                               |
| N: 131 (1 study) 18 months                                                                                                                                                                                         | Not serious        | N/A           | Not serious  | Serious <sup>1</sup>      | N/A              | Moderate                    | 32/63 (50.8%)           | 44/68 (64.7%)                | RR, 1.27 (0.94–1.72)     | 508 per 1000                 | 139 more per 1000 (from 28 fewer to 365 more) |
| <b>Steroid-free clinical remission (critical outcome)</b>                                                                                                                                                          |                    |               |              |                           |                  |                             |                         |                              |                          |                              |                                               |
| N: 131 (1 study) 18 months                                                                                                                                                                                         | Not serious        | N/A           | Not serious  | Serious <sup>2</sup>      | N/A              | Moderate                    | 23/63 (36.5%)           | 30/68 (44.1%)                | RR, 1.21 (0.79–1.84)     | 365 per 1000                 | 76 more per 1000 (from 76 fewer to 307 more)  |
| <b>Serious adverse events, SAEs (critical outcome)</b>                                                                                                                                                             |                    |               |              |                           |                  |                             |                         |                              |                          |                              |                                               |
| N: 131 (1 study) 18 months                                                                                                                                                                                         | Not serious        | N/A           | Not serious  | Very serious <sup>3</sup> | N/A              | Low                         | 7/63 (11.1%)            | 14/68 (20.6%)                | RR, 1.85 (0.80–4.29)     | 111 per 1000                 | 95 more per 1000 (from 22 fewer to 366 more)  |
| <b>Reference:</b> Panés J, López-Sanromán A, Bermejo F, et al. Early azathioprine therapy is no more effective than placebo for newly diagnosed Crohn's disease. <i>Gastroenterology</i> 2013; 145(4): 766–774.e1. |                    |               |              |                           |                  |                             |                         |                              |                          |                              |                                               |
| <b>Footnotes:</b>                                                                                                                                                                                                  |                    |               |              |                           |                  |                             |                         |                              |                          |                              |                                               |
| <sup>1</sup> Sparse data (76 events)                                                                                                                                                                               |                    |               |              |                           |                  |                             |                         |                              |                          |                              |                                               |
| <sup>2</sup> Sparse data (53 events)                                                                                                                                                                               |                    |               |              |                           |                  |                             |                         |                              |                          |                              |                                               |
| <sup>3</sup> Sparse data (21 events) and wide CI                                                                                                                                                                   |                    |               |              |                           |                  |                             |                         |                              |                          |                              |                                               |
| <b>Comment:</b> Evidence was sought also for endoscopic remission, PRO remission, radiological remission, biochemical remission and quality of life; however, data were insufficient.                              |                    |               |              |                           |                  |                             |                         |                              |                          |                              |                                               |
| <b>Abbreviations:</b> CD, Crohn's disease; N/A, not applicable; RR, risk ratio; CI, confidence interval.                                                                                                           |                    |               |              |                           |                  |                             |                         |                              |                          |                              |                                               |

**Summary of Findings Table 17** (Treatment with methotrexate for the maintenance of remission in patients with steroid-dependent CD)

| <p><b>PICO question:</b> Is treatment with methotrexate effective for the maintenance of remission in patients with steroid-dependent CD?<br/> <b>P:</b> Patients with steroid-dependent CD in remission<br/> <b>I:</b> Methotrexate (any dose)<br/> <b>C:</b> No treatment OR placebo</p>                                                                                                                                                                                                                                                                                                                                                   |                    |               |              |                      |                  |                             |                         |                              |                          |                              |                                                 |
|----------------------------------------------------------------------------------------------------------------------------------------------------------------------------------------------------------------------------------------------------------------------------------------------------------------------------------------------------------------------------------------------------------------------------------------------------------------------------------------------------------------------------------------------------------------------------------------------------------------------------------------------|--------------------|---------------|--------------|----------------------|------------------|-----------------------------|-------------------------|------------------------------|--------------------------|------------------------------|-------------------------------------------------|
| Nr of participants (studies)<br>Follow-up                                                                                                                                                                                                                                                                                                                                                                                                                                                                                                                                                                                                    | Quality assessment |               |              |                      |                  |                             | Summary of Findings     |                              |                          |                              |                                                 |
|                                                                                                                                                                                                                                                                                                                                                                                                                                                                                                                                                                                                                                              | Risk of bias       | Inconsistency | Indirectness | Imprecision          | Publication bias | Overall quality of evidence | Study event rates       |                              | Relative effect (95% CI) | Anticipated absolute effects |                                                 |
|                                                                                                                                                                                                                                                                                                                                                                                                                                                                                                                                                                                                                                              |                    |               |              |                      |                  |                             | Risk with control group | Risk with intervention group |                          | Risk with control group      | Risk difference with intervention group         |
| <b>Clinical remission/Steroid-free clinical remission (critical outcome)</b>                                                                                                                                                                                                                                                                                                                                                                                                                                                                                                                                                                 |                    |               |              |                      |                  |                             |                         |                              |                          |                              |                                                 |
| N: 76<br>(1 study)<br>40 weeks                                                                                                                                                                                                                                                                                                                                                                                                                                                                                                                                                                                                               | Not serious        | N/A           | Not serious  | Serious <sup>1</sup> | N/A              | Moderate                    | 14/36 (38.9%)           | 26/40 (65.0%)                | RR, 1.67<br>(1.05–2.67)  | 389 per 1000                 | 261 more per 1000<br>(from 18 more to 649 more) |
| <p><b>Reference:</b> Feagan B, Fedorak R, Irvine E, et al. A comparison of methotrexate with placebo for the maintenance of remission in Crohn's disease. <i>New England Journal of Medicine</i> 2000; 342: 1627–1632.</p> <p><b>Footnotes:</b><br/> <sup>1</sup>Sparse data (40 events)</p> <p><b>Comment:</b> We also searched for evidence regarding endoscopic remission, PRO remission, radiological remission, biochemical remission, serious adverse events and quality of life; however, data were insufficient.</p> <p><b>Abbreviations:</b> CD, Crohn's disease; N/A, not applicable; RR, risk ratio; CI, confidence interval.</p> |                    |               |              |                      |                  |                             |                         |                              |                          |                              |                                                 |

## Summary of Findings Table 18 (Anti- TNFs versus placebo)

| <b>PICO question:</b> Is maintenance treatment with anti-TNFs appropriate for CD patients achieving remission with anti-TNFs?<br><b>P:</b> CD patients having achieved remission with anti-TNFs<br><b>I:</b> TNF-inhibitors (infliximab, adalimumab, certolizumab)<br><b>C:</b> No treatment or placebo                                                                                                                                                                                                                                                                   |                    |               |              |                      |                  |                             |                         |                              |                          |                              |                                              |
|---------------------------------------------------------------------------------------------------------------------------------------------------------------------------------------------------------------------------------------------------------------------------------------------------------------------------------------------------------------------------------------------------------------------------------------------------------------------------------------------------------------------------------------------------------------------------|--------------------|---------------|--------------|----------------------|------------------|-----------------------------|-------------------------|------------------------------|--------------------------|------------------------------|----------------------------------------------|
| Nr of participants (studies) Follow-up                                                                                                                                                                                                                                                                                                                                                                                                                                                                                                                                    | Quality assessment |               |              |                      |                  |                             | Summary of Findings     |                              |                          |                              |                                              |
|                                                                                                                                                                                                                                                                                                                                                                                                                                                                                                                                                                           | Risk of bias       | Inconsistency | Indirectness | Imprecision          | Publication bias | Overall quality of evidence | Study event rates       |                              | Relative effect (95% CI) | Anticipated absolute effects |                                              |
|                                                                                                                                                                                                                                                                                                                                                                                                                                                                                                                                                                           |                    |               |              |                      |                  |                             | Risk with control group | Risk with intervention group |                          | Risk with control group      | Risk difference with intervention group      |
| <b>Clinical remission (critical outcome)</b>                                                                                                                                                                                                                                                                                                                                                                                                                                                                                                                              |                    |               |              |                      |                  |                             |                         |                              |                          |                              |                                              |
| N: 1690 (5 studies) 24–30 weeks                                                                                                                                                                                                                                                                                                                                                                                                                                                                                                                                           | Not serious        | Not serious   | Not serious  | Not serious          | Undetected       | High                        | 153/839 (18.2%)         | 278/851 (32.7%)              | RR, 1.78 (1.51–2.09)     | 182 per 1000                 | 142 more per 1000 (from 93 more to 199 more) |
| <b>Endoscopic remission (critical outcome)</b>                                                                                                                                                                                                                                                                                                                                                                                                                                                                                                                            |                    |               |              |                      |                  |                             |                         |                              |                          |                              |                                              |
| N: 163 (2 studies) 52–54 weeks                                                                                                                                                                                                                                                                                                                                                                                                                                                                                                                                            | Not serious        | Not serious   | Not serious  | Serious <sup>1</sup> | Undetected       | Moderate                    | 1/75 (1.3%)             | 28/88 (31.8%)                | RR, 19.7 (3.5–110.8)     | 13 per 1000                  | 249 more per 1000 (from 33 more to 987 more) |
| <b>References:</b><br>– Stidham R, Lee T, Higgins P, et al. Systematic review with network meta-analysis: the efficacy of anti-TNF agents for the treatment of Crohn's disease. <i>Alimentary Pharmacology and Therapeutics</i> 2014; 39(12): 1349–1362.<br>– Cholapranee A, Hazlewood G, Kaplan G, et al. Systematic review with meta-analysis: comparative efficacy of biologics for induction and maintenance of mucosal healing in Crohn's disease and ulcerative colitis controlled trials. <i>Alimentary Pharmacology and Therapeutics</i> 2017; 45(10): 1291–1302. |                    |               |              |                      |                  |                             |                         |                              |                          |                              |                                              |
| <b>Footnote:</b><br><sup>1</sup> Sparse data (29 events) and very wide CI.                                                                                                                                                                                                                                                                                                                                                                                                                                                                                                |                    |               |              |                      |                  |                             |                         |                              |                          |                              |                                              |
| <b>Comment:</b> Evidence was sought also for steroid-free clinical remission, PRO remission, radiological and biochemical remission, quality of life, and serious adverse events; however, data were insufficient.                                                                                                                                                                                                                                                                                                                                                        |                    |               |              |                      |                  |                             |                         |                              |                          |                              |                                              |
| <b>Abbreviations:</b> CD, Crohn's disease; TNF, tumor necrosis factor; RR, risk ratio; CI, confidence interval.                                                                                                                                                                                                                                                                                                                                                                                                                                                           |                    |               |              |                      |                  |                             |                         |                              |                          |                              |                                              |

### Summary of Findings Table 19 (Vedolizumab versus placebo)

| <b>PICO question:</b> Is maintenance treatment with vedolizumab appropriate for CD patients achieving remission with vedolizumab?<br><b>P:</b> CD patients having achieved remission with vedolizumab<br><b>I:</b> Vedolizumab<br><b>C:</b> No treatment or placebo |                    |               |              |                      |                  |                             |                         |                              |                          |                              |                                              |
|---------------------------------------------------------------------------------------------------------------------------------------------------------------------------------------------------------------------------------------------------------------------|--------------------|---------------|--------------|----------------------|------------------|-----------------------------|-------------------------|------------------------------|--------------------------|------------------------------|----------------------------------------------|
| Nr of participants (studies) Follow-up                                                                                                                                                                                                                              | Quality assessment |               |              |                      |                  |                             | Summary of Findings     |                              |                          |                              |                                              |
|                                                                                                                                                                                                                                                                     | Risk of bias       | Inconsistency | Indirectness | Imprecision          | Publication bias | Overall quality of evidence | Study event rates       |                              | Relative effect (95% CI) | Anticipated absolute effects |                                              |
|                                                                                                                                                                                                                                                                     |                    |               |              |                      |                  |                             | Risk with control group | Risk with intervention group |                          | Risk with control group      | Risk difference with intervention group      |
| <b>Clinical remission (critical outcome)</b>                                                                                                                                                                                                                        |                    |               |              |                      |                  |                             |                         |                              |                          |                              |                                              |
| N: 307 (1 study) 46 weeks                                                                                                                                                                                                                                           | Not serious        | N/A           | Not serious  | Not serious          | N/A              | High                        | 33/153 (21.6%)          | 60/154 (39.0%)               | RR, 1.81 (1.26–2.59)     | 216 per 1000                 | 174 more per 1000 (from 56 more to 343 more) |
| <b>Steroid-free clinical remission (critical outcome)</b>                                                                                                                                                                                                           |                    |               |              |                      |                  |                             |                         |                              |                          |                              |                                              |
| N: 164 (1 study) 46 weeks                                                                                                                                                                                                                                           | Not serious        | N/A           | Not serious  | Serious <sup>1</sup> | N/A              | Moderate                    | 13/82 (15.9%)           | 26/82 (31.7%)                | RR, 2.00 (1.11–3.61)     | 159 per 1000                 | 159 more per 1000 (from 17 more to 414 more) |
| <b>Serious adverse events, SAEs (critical outcome)</b>                                                                                                                                                                                                              |                    |               |              |                      |                  |                             |                         |                              |                          |                              |                                              |
| N: 307 (1 study) 46 weeks                                                                                                                                                                                                                                           | Not serious        | N/A           | Not serious  | Serious <sup>2</sup> | N/A              | Moderate                    | 23/153 (15.0%)          | 28/154 (18.2%)               | RR, 1.21 (0.73–2.00)     | 150 per 1000                 | 31 more per 1000 (from 41 fewer to 150 more) |
| <b>Reference:</b> Sandborn WJ, Feagan BG, Rutgeerts P, et al. Vedolizumab as induction and maintenance therapy for Crohn's disease. <i>New England Journal of Medicine</i> 2013; 369: 711–721.                                                                      |                    |               |              |                      |                  |                             |                         |                              |                          |                              |                                              |
| <b>Footnotes:</b><br><sup>1</sup> Sparse data (39 events)<br><sup>2</sup> Sparse data (51 events)                                                                                                                                                                   |                    |               |              |                      |                  |                             |                         |                              |                          |                              |                                              |
| <b>Comment:</b> Evidence was sought also for endoscopic remission, PRO remission, radiological remission, biochemical remission and quality of life; however, data were insufficient.                                                                               |                    |               |              |                      |                  |                             |                         |                              |                          |                              |                                              |
| <b>Abbreviations:</b> CD, Crohn's disease; N/A, not applicable; RR, risk ratio; CI, confidence interval.                                                                                                                                                            |                    |               |              |                      |                  |                             |                         |                              |                          |                              |                                              |



## Summary of Findings Table 20 (Ustekinumab versus placebo)

| <b>PICO question:</b> Is maintenance treatment with ustekinumab appropriate for CD patients achieving remission with ustekinumab?<br><b>P:</b> CD patients having achieved remission with ustekinumab<br><b>I:</b> Ustekinumab<br><b>C:</b> No treatment or placebo                                                                                                                      |                    |               |              |                           |                  |                             |                         |                              |                          |                              |                                              |
|------------------------------------------------------------------------------------------------------------------------------------------------------------------------------------------------------------------------------------------------------------------------------------------------------------------------------------------------------------------------------------------|--------------------|---------------|--------------|---------------------------|------------------|-----------------------------|-------------------------|------------------------------|--------------------------|------------------------------|----------------------------------------------|
| Nr of participants (studies) Follow-up                                                                                                                                                                                                                                                                                                                                                   | Quality assessment |               |              |                           |                  |                             | Summary of Findings     |                              |                          |                              |                                              |
|                                                                                                                                                                                                                                                                                                                                                                                          | Risk of bias       | Inconsistency | Indirectness | Imprecision               | Publication bias | Overall quality of evidence | Study event rates       |                              | Relative effect (95% CI) | Anticipated absolute effects |                                              |
|                                                                                                                                                                                                                                                                                                                                                                                          |                    |               |              |                           |                  |                             | Risk with control group | Risk with intervention group |                          | Risk with control group      | Risk difference with intervention group      |
| <b>Clinical remission (critical outcome)</b>                                                                                                                                                                                                                                                                                                                                             |                    |               |              |                           |                  |                             |                         |                              |                          |                              |                                              |
| N: 388 (1 study) 44 weeks                                                                                                                                                                                                                                                                                                                                                                | Not serious        | N/A           | Not serious  | Not serious               | N/A              | High                        | 47/131 (35.9%)          | 131/257 (51.0%)              | RR, 1.42 (1.10–1.84)     | 359 per 1000                 | 151 more per 1000 (from 36 more to 301 more) |
| <b>Steroid-free clinical remission (critical outcome)</b>                                                                                                                                                                                                                                                                                                                                |                    |               |              |                           |                  |                             |                         |                              |                          |                              |                                              |
| N: 388 (1 study) 44 weeks                                                                                                                                                                                                                                                                                                                                                                | Not serious        | N/A           | Not serious  | Not serious               | N/A              | High                        | 39/131 (29.8%)          | 115/257 (44.7%)              | RR, 1.50 (1.12–2.02)     | 298 per 1000                 | 149 more per 1000 (from 36 more to 304 more) |
| <b>Endoscopic remission (important outcome)</b>                                                                                                                                                                                                                                                                                                                                          |                    |               |              |                           |                  |                             |                         |                              |                          |                              |                                              |
| N: 70 (1 study) 44 weeks                                                                                                                                                                                                                                                                                                                                                                 | Not serious        | N/A           | Not serious  | Very serious <sup>1</sup> | N/A              | Low                         | 1/24 (4.2%)             | 5/46 (10.9%)                 | RR, 2.61 (0.32–21.08)    | 42 per 1000                  | 67 more per 1000 (from 28 fewer to 837 more) |
| <b>Serious adverse events, SAEs (critical outcome)</b>                                                                                                                                                                                                                                                                                                                                   |                    |               |              |                           |                  |                             |                         |                              |                          |                              |                                              |
| N: 396 (1 study) 44 weeks                                                                                                                                                                                                                                                                                                                                                                | Not serious        | N/A           | Not serious  | Serious <sup>2</sup>      | N/A              | Moderate                    | 20/133 (15.0%)          | 29/263 (11.0%)               | RR, 0.73 (0.43–1.25)     | 150 per 1000                 | 41 fewer per 1000 (from 86 fewer to 38 more) |
| <b>References:</b><br>-- Feagan BG, Sandborn WJ, Gasink C, et al. Ustekinumab as induction and maintenance therapy for Crohn's disease. <i>New England Journal of Medicine</i> 2016; 375: 1946-1960.<br>-- Rutgeerts P, Gasink C, Chan D, et al. Efficacy of ustekinumab for inducing endoscopic healing in patients with Crohn's disease. <i>Gastroenterology</i> 2018; 155: 1045-1058. |                    |               |              |                           |                  |                             |                         |                              |                          |                              |                                              |
| <b>Footnotes:</b><br><sup>1</sup> Sparse data (6 events) and wide CI<br><sup>2</sup> Sparse data (49 events)                                                                                                                                                                                                                                                                             |                    |               |              |                           |                  |                             |                         |                              |                          |                              |                                              |
| <b>Comment:</b> We also searched for evidence regarding PRO remission, radiological remission, biochemical remission and quality of life; however, data were insufficient.                                                                                                                                                                                                               |                    |               |              |                           |                  |                             |                         |                              |                          |                              |                                              |
| <b>Abbreviations:</b> CD, Crohn's disease; N/A, not applicable; RR, risk ratio; CI, confidence interval.                                                                                                                                                                                                                                                                                 |                    |               |              |                           |                  |                             |                         |                              |                          |                              |                                              |

## Summary of Findings Table 21 (Proactive therapeutic drug monitoring (TDM) approach versus standard symptom-based approach)

| <b>PICO question:</b> In CD patients in clinical remission under anti-TNF treatment, is the proactive therapeutic drug monitoring (TDM) approach more effective than the standard symptom-based approach?                                                                                                         |                    |               |                      |                      |                  |                             |                         |                              |                          |                              |                                                |
|-------------------------------------------------------------------------------------------------------------------------------------------------------------------------------------------------------------------------------------------------------------------------------------------------------------------|--------------------|---------------|----------------------|----------------------|------------------|-----------------------------|-------------------------|------------------------------|--------------------------|------------------------------|------------------------------------------------|
| <b>P:</b> CD patients in clinical remission under anti-TNF treatment.                                                                                                                                                                                                                                             |                    |               |                      |                      |                  |                             |                         |                              |                          |                              |                                                |
| <b>I:</b> TDM approach (according to serum anti-TNF trough levels)                                                                                                                                                                                                                                                |                    |               |                      |                      |                  |                             |                         |                              |                          |                              |                                                |
| <b>C:</b> Symptom-based approach                                                                                                                                                                                                                                                                                  |                    |               |                      |                      |                  |                             |                         |                              |                          |                              |                                                |
| Nr of participants (studies) Follow-up                                                                                                                                                                                                                                                                            | Quality assessment |               |                      |                      |                  |                             | Summary of Findings     |                              |                          |                              |                                                |
|                                                                                                                                                                                                                                                                                                                   | Risk of bias       | Inconsistency | Indirectness         | Imprecision          | Publication bias | Overall quality of evidence | Study event rates       |                              | Relative effect (95% CI) | Anticipated absolute effects |                                                |
|                                                                                                                                                                                                                                                                                                                   |                    |               |                      |                      |                  |                             | Risk with control group | Risk with intervention group |                          | Risk with control group      | Risk difference with intervention group        |
| <b>Clinical remission (critical outcome)</b>                                                                                                                                                                                                                                                                      |                    |               |                      |                      |                  |                             |                         |                              |                          |                              |                                                |
| N: 173 (1 study) 52 weeks                                                                                                                                                                                                                                                                                         | Not serious        | N/A           | Serious <sup>1</sup> | Not serious          | N/A              | Moderate                    | 45/82 (54.9%)           | 57/91 (62.6%)                | RR, 1.14 (0.89–1.47)     | 549 per 1000                 | 78 more per 1000 (from 62 fewer to 257 more)   |
| <b>Steroid-free clinical remission (critical outcome)</b>                                                                                                                                                                                                                                                         |                    |               |                      |                      |                  |                             |                         |                              |                          |                              |                                                |
| N: 122 (1 study) 40 weeks                                                                                                                                                                                                                                                                                         | Not serious        | N/A           | Not serious          | Serious <sup>2</sup> | N/A              | Moderate                    | 16/40 (40.0%)           | 25/82 (30.5%)                | RR, 0.76 (0.46–1.26)     | 400 per 1000                 | 96 fewer per 1000 (from 216 fewer to 104 more) |
| <b>Endoscopic remission (critical outcome)</b>                                                                                                                                                                                                                                                                    |                    |               |                      |                      |                  |                             |                         |                              |                          |                              |                                                |
| N: 122 (1 study) 40 weeks                                                                                                                                                                                                                                                                                         | Not serious        | N/A           | Not serious          | Serious <sup>3</sup> | N/A              | Moderate                    | 21/40 (52.5%)           | 42/82 (51.2%)                | RR, 0.98 (0.68–1.40)     | 525 per 1000                 | 11 fewer per 1000 (from 168 fewer to 210 more) |
| <b>Biochemical remission (critical outcome)</b>                                                                                                                                                                                                                                                                   |                    |               |                      |                      |                  |                             |                         |                              |                          |                              |                                                |
| N: 173 (1 study) 52 weeks                                                                                                                                                                                                                                                                                         | Not serious        | N/A           | Serious <sup>1</sup> | Not serious          | N/A              | Moderate                    | 45/82 (54.9%)           | 57/91 (62.6%)                | RR, 1.14 (0.89–1.47)     | 549 per 1000                 | 78 more per 1000 (from 62 fewer to 257 more)   |
| <b>Serious adverse events, SAEs (critical outcome)</b>                                                                                                                                                                                                                                                            |                    |               |                      |                      |                  |                             |                         |                              |                          |                              |                                                |
| N: 122 (1 study) 40 weeks                                                                                                                                                                                                                                                                                         | Not serious        | N/A           | Not serious          | Serious <sup>4</sup> | N/A              | Moderate                    | 11/40 (27.5%)           | 28/82 (34.1%)                | RR, 1.24 (0.69–2.23)     | 275 per 1000                 | 66 more per 1000 (from 85 fewer to 338 more)   |
| <b>References:</b>                                                                                                                                                                                                                                                                                                |                    |               |                      |                      |                  |                             |                         |                              |                          |                              |                                                |
| -- D'Haens G, Vermeire S, Lambrecht G, et al. Increasing infliximab dose based on symptoms, biomarkers, and serum drug concentrations does not increase clinical, endoscopic, and corticosteroid-free remission in patients with active luminal Crohn's disease. <i>Gastroenterology</i> 2018; 154(5): 1343–1351. |                    |               |                      |                      |                  |                             |                         |                              |                          |                              |                                                |
| -- Vande Casteele N, Ferrante M, Van Assche G, et al. Trough concentrations of infliximab guide dosing for patients with inflammatory bowel disease. <i>Gastroenterology</i> 2015; 148(7): 1320–1329.e3                                                                                                           |                    |               |                      |                      |                  |                             |                         |                              |                          |                              |                                                |
| <b>Footnotes:</b>                                                                                                                                                                                                                                                                                                 |                    |               |                      |                      |                  |                             |                         |                              |                          |                              |                                                |
| <sup>1</sup> The study measured the impact of the intervention of interest on a composite outcome (clinical and biochemical remission) that is closely related to, but different from our outcome.                                                                                                                |                    |               |                      |                      |                  |                             |                         |                              |                          |                              |                                                |
| <sup>2</sup> Sparse data (41 events)                                                                                                                                                                                                                                                                              |                    |               |                      |                      |                  |                             |                         |                              |                          |                              |                                                |
| <sup>3</sup> Sparse data (63 events)                                                                                                                                                                                                                                                                              |                    |               |                      |                      |                  |                             |                         |                              |                          |                              |                                                |
| <sup>4</sup> Sparse data (39 events)                                                                                                                                                                                                                                                                              |                    |               |                      |                      |                  |                             |                         |                              |                          |                              |                                                |
| <b>Comment:</b> We also searched for evidence regarding PRO remission, radiological remission, and quality of life; however, data were insufficient.                                                                                                                                                              |                    |               |                      |                      |                  |                             |                         |                              |                          |                              |                                                |
| <b>Abbreviations:</b> CD, Crohn's disease; TDM, therapeutic drug monitoring; N/A, not applicable; RR, risk ratio; CI, confidence interval.                                                                                                                                                                        |                    |               |                      |                      |                  |                             |                         |                              |                          |                              |                                                |

**Summary of Findings Table 22** (Therapeutic drug monitoring (TDM) approach versus standard symptom-based approach in patients with secondary loss of response to Anti-TNF)

| <p><b>PICO question:</b> In CD patients having lost response to an anti-TNF agent, is the therapeutic drug monitoring (TDM) approach more effective than the standard symptom-based approach?<br/> <b>P:</b> CD patients having lost response to an anti-TNF agent<br/> <b>I:</b> Anti-TNF dose optimization or switching (to a different anti-TNF or to a drug with a different mechanism of action) according to serum anti-TNF trough levels/anti-drug antibodies<br/> <b>C:</b> Anti-TNF dose optimization according to symptoms</p>                                                                                                                                                                                                                                      |                      |               |              |                      |                  |                             |                         |                              |                          |                              |                                                  |
|-------------------------------------------------------------------------------------------------------------------------------------------------------------------------------------------------------------------------------------------------------------------------------------------------------------------------------------------------------------------------------------------------------------------------------------------------------------------------------------------------------------------------------------------------------------------------------------------------------------------------------------------------------------------------------------------------------------------------------------------------------------------------------|----------------------|---------------|--------------|----------------------|------------------|-----------------------------|-------------------------|------------------------------|--------------------------|------------------------------|--------------------------------------------------|
| Nr of participants (studies)<br>Follow-up                                                                                                                                                                                                                                                                                                                                                                                                                                                                                                                                                                                                                                                                                                                                     | Quality assessment   |               |              |                      |                  |                             | Summary of Findings     |                              |                          |                              |                                                  |
|                                                                                                                                                                                                                                                                                                                                                                                                                                                                                                                                                                                                                                                                                                                                                                               | Risk of bias         | Inconsistency | Indirectness | Imprecision          | Publication bias | Overall quality of evidence | Study event rates       |                              | Relative effect (95% CI) | Anticipated absolute effects |                                                  |
|                                                                                                                                                                                                                                                                                                                                                                                                                                                                                                                                                                                                                                                                                                                                                                               |                      |               |              |                      |                  |                             | Risk with control group | Risk with intervention group |                          | Risk with control group      | Risk difference with intervention group          |
| <b>Regain of clinical response (critical outcome)</b>                                                                                                                                                                                                                                                                                                                                                                                                                                                                                                                                                                                                                                                                                                                         |                      |               |              |                      |                  |                             |                         |                              |                          |                              |                                                  |
| N: 69<br>(1 study)<br>12 weeks                                                                                                                                                                                                                                                                                                                                                                                                                                                                                                                                                                                                                                                                                                                                                | Serious <sup>1</sup> | N/A           | Not serious  | Serious <sup>2</sup> | N/A              | Low                         | 19/36 (52.8%)           | 19/33 (57.6%)                | RR, 1.09<br>(0.71–1.67)  | 528 per 1000                 | 48 more per 1000<br>(from 152 fewer to 354 more) |
| <p><b>Reference:</b> Steenholdt C, Brynskov J, Thomsen OØ, et al. Individualised therapy is more cost-effective than dose intensification in patients with Crohn's disease who lose response to anti-TNF treatment: a randomised, controlled trial. <i>Gut</i>. 2014; 63(6): 919–927.</p> <p><b>Footnotes:</b><br/> <sup>1</sup> Single-blind study<br/> <sup>2</sup> Sparse data (38 events)</p> <p><b>Comment:</b> We also searched for evidence regarding endoscopic remission, PRO remission, radiological remission, biochemical remission, quality of life and serious adverse events; however, data were insufficient.</p> <p><b>Abbreviations:</b> CD, Crohn's disease; TNF, tumor necrosis factor; N/A, not applicable; RR, risk ratio; CI, confidence interval.</p> |                      |               |              |                      |                  |                             |                         |                              |                          |                              |                                                  |

### Summary of Findings Table 23 (Cessation of thiopurines monotherapy for patients in long-term remission)

| <b>PICO question:</b> For CD patients in long-term remission on thiopurine maintenance therapy, should cessation of treatment be considered?<br><b>P:</b> CD patients in long-term remission on thiopurine maintenance therapy<br><b>I:</b> Cessation of treatment<br><b>C:</b> Continuation of treatment |                    |               |              |                           |                  |                             |                         |                              |                          |                              |                                              |
|-----------------------------------------------------------------------------------------------------------------------------------------------------------------------------------------------------------------------------------------------------------------------------------------------------------|--------------------|---------------|--------------|---------------------------|------------------|-----------------------------|-------------------------|------------------------------|--------------------------|------------------------------|----------------------------------------------|
| Nr of participants (studies) Follow-up                                                                                                                                                                                                                                                                    | Quality assessment |               |              |                           |                  |                             | Summary of Findings     |                              |                          |                              |                                              |
|                                                                                                                                                                                                                                                                                                           | Risk of bias       | Inconsistency | Indirectness | Imprecision               | Publication bias | Overall quality of evidence | Study event rates       |                              | Relative effect (95% CI) | Anticipated absolute effects |                                              |
|                                                                                                                                                                                                                                                                                                           |                    |               |              |                           |                  |                             | Risk with control group | Risk with intervention group |                          | Risk with control group      | Risk difference with intervention group      |
| <b>Clinical relapse (critical outcome)</b>                                                                                                                                                                                                                                                                |                    |               |              |                           |                  |                             |                         |                              |                          |                              |                                              |
| N: 215 (4 studies) 12–24 months                                                                                                                                                                                                                                                                           | Not serious        | Not serious   | Not serious  | Serious <sup>1</sup>      | Undetected       | Moderate                    | 14/104 (13.5%)          | 36/111 (32.4%)               | RR, 2.39 (1.38–4.13)     | 135 per 1000                 | 188 more per 1000 (from 51 more to 423 more) |
| <b>Serious adverse events, SAEs (critical outcome)</b>                                                                                                                                                                                                                                                    |                    |               |              |                           |                  |                             |                         |                              |                          |                              |                                              |
| N: 134 (2 studies) 12–18 months                                                                                                                                                                                                                                                                           | Not serious        | Not serious   | Not serious  | Very serious <sup>2</sup> | Undetected       | Low                         | 2/64 (3.1%)             | 0/70 (0.0%)                  | RR, 0.32 (0.04–2.92)     | 31 per 1000                  | 21 fewer per 1000 (from 30 fewer to 60 more) |
| <b>Reference:</b> Boyapati RK, Torres J, Palmela C, Parker CE, Silverberg OM, Upadhyaya SD, Nguyen TM, Colombel JF. Withdrawal of immunosuppressant or biologic therapy for patients with quiescent Crohn's disease. Cochrane Database of Systematic Reviews 2018, Issue 5. Art. No.: CD012540.           |                    |               |              |                           |                  |                             |                         |                              |                          |                              |                                              |
| <b>Footnotes:</b><br><sup>1</sup> Sparse data (50 events)<br><sup>2</sup> Sparse data (2 events) and very wide CIs                                                                                                                                                                                        |                    |               |              |                           |                  |                             |                         |                              |                          |                              |                                              |
| <b>Comment:</b> We also searched for evidence regarding steroid-free clinical remission; however, data were insufficient.                                                                                                                                                                                 |                    |               |              |                           |                  |                             |                         |                              |                          |                              |                                              |
| <b>Abbreviations:</b> CD, Crohn's disease; RR, risk ratio; CI, confidence interval.                                                                                                                                                                                                                       |                    |               |              |                           |                  |                             |                         |                              |                          |                              |                                              |

**Summary of Findings Table 24** (Cessation of thiopurines when used in combination therapy with Infliximab, in patients in long-term remission)

| <b>PICO question:</b> If long-term remission has been achieved with the combination of anti-TNF therapy and immunosuppressants in treatment naïve CD patients, can anti-TNF monotherapy be recommended?                                                                                         |                      |               |                      |                           |                  |                             |                         |                              |                          |                              |                                               |
|-------------------------------------------------------------------------------------------------------------------------------------------------------------------------------------------------------------------------------------------------------------------------------------------------|----------------------|---------------|----------------------|---------------------------|------------------|-----------------------------|-------------------------|------------------------------|--------------------------|------------------------------|-----------------------------------------------|
| <b>P:</b> CD patients in long-term remission on combination of anti-TNF therapy and immunosuppressants in treatment naïve CD patients                                                                                                                                                           |                      |               |                      |                           |                  |                             |                         |                              |                          |                              |                                               |
| <b>I:</b> Continuation of combination treatment                                                                                                                                                                                                                                                 |                      |               |                      |                           |                  |                             |                         |                              |                          |                              |                                               |
| <b>C:</b> Anti-TNF monotherapy: <b>infliximab</b>                                                                                                                                                                                                                                               |                      |               |                      |                           |                  |                             |                         |                              |                          |                              |                                               |
| Nr of participants (studies) Follow-up                                                                                                                                                                                                                                                          | Quality assessment   |               |                      |                           |                  |                             | Summary of Findings     |                              |                          |                              |                                               |
|                                                                                                                                                                                                                                                                                                 | Risk of bias         | Inconsistency | Indirectness         | Imprecision               | Publication bias | Overall quality of evidence | Study event rates       |                              | Relative effect (95% CI) | Anticipated absolute effects |                                               |
|                                                                                                                                                                                                                                                                                                 |                      |               |                      |                           |                  |                             | Risk with control group | Risk with intervention group |                          | Risk with control group      | Risk difference with intervention group       |
| <b>Clinical relapse (critical outcome)</b>                                                                                                                                                                                                                                                      |                      |               |                      |                           |                  |                             |                         |                              |                          |                              |                                               |
| N: 111 (2 studies) 12–24 months                                                                                                                                                                                                                                                                 | Serious <sup>1</sup> | Not serious   | Serious <sup>2</sup> | Serious <sup>3</sup>      | N/A              | Very low                    | 27/55 (49.1%)           | 27/56 (48.2%)                | RR, 1.02 (0.68–1.52)     | 491 per 1000                 | 10 more per 1000 (from 156 fewer to 257 more) |
| <b>Serious adverse events, SAEs (critical outcome)</b>                                                                                                                                                                                                                                          |                      |               |                      |                           |                  |                             |                         |                              |                          |                              |                                               |
| N: 80 (1 study) 24 months                                                                                                                                                                                                                                                                       | Serious <sup>1</sup> | N/A           | Not serious          | Very serious <sup>4</sup> | N/A              | Very low                    | 3/40 (7.5%)             | 3/40 (7.5%)                  | RR, 1.00 (0.21–4.66)     | 75 per 1000                  | 0 more per 1000 (from 59 fewer to 275 more)   |
| <b>Reference:</b> Boyapati RK, Torres J, Palmela C, Parker CE, Silverberg OM, Upadhyaya SD, Nguyen TM, Colombel JF. Withdrawal of immunosuppressant or biologic therapy for patients with quiescent Crohn’s disease. Cochrane Database of Systematic Reviews 2018, Issue 5. Art. No.: CD012540. |                      |               |                      |                           |                  |                             |                         |                              |                          |                              |                                               |
| <b>Footnotes:</b>                                                                                                                                                                                                                                                                               |                      |               |                      |                           |                  |                             |                         |                              |                          |                              |                                               |
| <sup>1</sup> High risk of bias for blinding                                                                                                                                                                                                                                                     |                      |               |                      |                           |                  |                             |                         |                              |                          |                              |                                               |
| <sup>2</sup> Definition of relapse varied between studies, and differed from our outcome of interest                                                                                                                                                                                            |                      |               |                      |                           |                  |                             |                         |                              |                          |                              |                                               |
| <sup>3</sup> Sparse data (54 events)                                                                                                                                                                                                                                                            |                      |               |                      |                           |                  |                             |                         |                              |                          |                              |                                               |
| <sup>4</sup> Very sparse data (6 events) and wide CIs                                                                                                                                                                                                                                           |                      |               |                      |                           |                  |                             |                         |                              |                          |                              |                                               |
| <b>Comment:</b> Evidence was sought also for steroid-free clinical remission; however, data were insufficient.                                                                                                                                                                                  |                      |               |                      |                           |                  |                             |                         |                              |                          |                              |                                               |
| <b>Abbreviations:</b> CD, Crohn’s disease; TNF, tumor necrosis factor; N/A, not applicable; RR, risk ratio; CI, confidence interval.                                                                                                                                                            |                      |               |                      |                           |                  |                             |                         |                              |                          |                              |                                               |

**Summary of Findings Table 25** (Cessation of thiopurines when used in combination therapy with Adalimumab, in patients in long-term remission)

| <b>PICO question:</b> If long-term remission has been achieved with the combination of anti-TNF therapy and immunosuppressants in treatment naïve CD patients, can anti-TNF monotherapy be recommended?                                                                                                                              |                    |               |              |             |                  |                             |                         |                              |                          |                              |                                             |
|--------------------------------------------------------------------------------------------------------------------------------------------------------------------------------------------------------------------------------------------------------------------------------------------------------------------------------------|--------------------|---------------|--------------|-------------|------------------|-----------------------------|-------------------------|------------------------------|--------------------------|------------------------------|---------------------------------------------|
| <b>P:</b> CD patients in long-term remission on combination of anti-TNF therapy and immunosuppressants in treatment naïve CD patients                                                                                                                                                                                                |                    |               |              |             |                  |                             |                         |                              |                          |                              |                                             |
| <b>I:</b> Continuation of combination treatment                                                                                                                                                                                                                                                                                      |                    |               |              |             |                  |                             |                         |                              |                          |                              |                                             |
| <b>C:</b> Anti-TNF monotherapy: <b>adalimumab</b>                                                                                                                                                                                                                                                                                    |                    |               |              |             |                  |                             |                         |                              |                          |                              |                                             |
| Nr of participants (studies) Follow-up                                                                                                                                                                                                                                                                                               | Quality assessment |               |              |             |                  |                             | Summary of Findings     |                              |                          |                              |                                             |
|                                                                                                                                                                                                                                                                                                                                      | Risk of bias       | Inconsistency | Indirectness | Imprecision | Publication bias | Overall quality of evidence | Study event rates       |                              | Relative effect (95% CI) | Anticipated absolute effects |                                             |
|                                                                                                                                                                                                                                                                                                                                      |                    |               |              |             |                  |                             | Risk with control group | Risk with intervention group |                          | Risk with control group      | Risk difference with intervention group     |
| <b>Clinical remission (critical outcome)</b>                                                                                                                                                                                                                                                                                         |                    |               |              |             |                  |                             |                         |                              |                          |                              |                                             |
| N: 1885 (9 studies) 56 weeks                                                                                                                                                                                                                                                                                                         | Not serious        | Not serious   | Not serious  | Not serious | Undetected       | Low <sup>1</sup>            | 408/1026 (39.8%)        | 356/859 (41.4%)              | RR, 1.01 (0.91–1.13)     | 398 per 1000                 | 6 more per 1000 (from 37 fewer to 53 more)  |
| <b>Serious adverse events, SAEs (critical outcome)</b>                                                                                                                                                                                                                                                                               |                    |               |              |             |                  |                             |                         |                              |                          |                              |                                             |
| N: 3274 (8 studies) 56 weeks                                                                                                                                                                                                                                                                                                         | Not serious        | Not serious   | Not serious  | Not serious | Undetected       | Low <sup>1</sup>            | 128/1743 (7.3%)         | 101/1531 (6.6%)              | RR, 0.88 (0.62–1.26)     | 73 per 1000                  | 9 fewer per 1000 (from 28 fewer to 19 more) |
| <b>Reference:</b> Chalhoub JM, Rimmani HH, Gumaste VV, Sharara AI. Systematic review and meta-analysis: adalimumab monotherapy versus combination therapy with immunomodulators for induction and maintenance of remission and response in patients with Crohn's disease. <i>Inflammatory Bowel Diseases</i> 2017; 23(8): 1316–1327. |                    |               |              |             |                  |                             |                         |                              |                          |                              |                                             |
| <b>Footnotes:</b><br><sup>1</sup> Evidence from observational studies starts as low quality.                                                                                                                                                                                                                                         |                    |               |              |             |                  |                             |                         |                              |                          |                              |                                             |
| <b>Comment:</b> Evidence was sought also for steroid-free clinical remission; however, data were insufficient.                                                                                                                                                                                                                       |                    |               |              |             |                  |                             |                         |                              |                          |                              |                                             |
| <b>Abbreviations:</b> CD, Crohn's disease; TNF, tumor necrosis factor; RR, risk ratio; CI, confidence interval.                                                                                                                                                                                                                      |                    |               |              |             |                  |                             |                         |                              |                          |                              |                                             |

## Summary Of Findings Tables Referring To the Treatment of Complex Fistulising Perianal Disease (Section 3 In Manuscript)

### Summary of Findings Table 26 (Infliximab versus placebo)

| <b>PICO question:</b> Infliximab vs placebo<br><b>P:</b> Patients with Crohn's disease complex perianal fistulae<br><b>I:</b> Infliximab<br><b>C:</b> No treatment or placebo                                                                                                                                                                                         |                    |                      |              |                      |                  |                             |                         |                              |                          |                              |                                               |
|-----------------------------------------------------------------------------------------------------------------------------------------------------------------------------------------------------------------------------------------------------------------------------------------------------------------------------------------------------------------------|--------------------|----------------------|--------------|----------------------|------------------|-----------------------------|-------------------------|------------------------------|--------------------------|------------------------------|-----------------------------------------------|
| Nr of participants (studies) Follow-up                                                                                                                                                                                                                                                                                                                                | Quality assessment |                      |              |                      |                  |                             | Summary of Findings     |                              |                          |                              |                                               |
|                                                                                                                                                                                                                                                                                                                                                                       | Risk of bias       | Inconsistency        | Indirectness | Imprecision          | Publication bias | Overall quality of evidence | Study event rates       |                              | Relative effect (95% CI) | Anticipated absolute effects |                                               |
|                                                                                                                                                                                                                                                                                                                                                                       |                    |                      |              |                      |                  |                             | Risk with control group | Risk with intervention group |                          | Risk with control group      | Risk difference with intervention group       |
| <b>Fistula healing (critical outcome)</b>                                                                                                                                                                                                                                                                                                                             |                    |                      |              |                      |                  |                             |                         |                              |                          |                              |                                               |
| N: 94 (1 study) 18 weeks                                                                                                                                                                                                                                                                                                                                              | Not serious        | N/A                  | Not serious  | Serious <sup>1</sup> | N/A              | Moderate                    | 4/31 (12.9%)            | 29/63 (46.0%)                | RR, 3.57 (1.38–9.25)     | 129 per 1000                 | 331 more per 1000 (from 48 more to 871 more)  |
| <b>Maintenance of clinical fistula healing (critical outcome)</b>                                                                                                                                                                                                                                                                                                     |                    |                      |              |                      |                  |                             |                         |                              |                          |                              |                                               |
| N: 195 (1 study) 54 weeks                                                                                                                                                                                                                                                                                                                                             | Not serious        | N/A                  | Not serious  | Serious <sup>2</sup> | N/A              | Moderate                    | 19/99 (19.2%)           | 33/96 (34.4%)                | RR, 1.79 (1.10–2.92)     | 192 per 1000                 | 152 more per 1000 (from 19 more to 369 more)  |
| <b>Serious adverse events, SAEs (critical outcome)</b>                                                                                                                                                                                                                                                                                                                |                    |                      |              |                      |                  |                             |                         |                              |                          |                              |                                               |
| N: 376 (2 studies) 18–54 weeks                                                                                                                                                                                                                                                                                                                                        | Not serious        | Serious <sup>3</sup> | Not serious  | Serious <sup>4</sup> | N/A              | Low                         | 33/175 (18.9%)          | 24/201 (11.9%)               | RR, 1.31 (0.11–15.25)    | 189 per 1000                 | 59 more per 1000 (from 167 fewer to 811 more) |
| <b>References:</b><br>-- Present D, Rutgeerts P, Targan S, et al. Infliximab for the treatment of fistulas in patients with Crohn's disease. New England Journal of Medicine 1999; 340: 1398–1405.<br>-- Sands B, Anderson F, Bernstein C, et al. Infliximab maintenance therapy for fistulizing Crohn's disease. New England Journal of Medicine 2004; 350: 876–885. |                    |                      |              |                      |                  |                             |                         |                              |                          |                              |                                               |
| <b>Footnotes:</b><br><sup>1</sup> Sparse data (33 events) and wide CI<br><sup>2</sup> Sparse data (52 events)<br><sup>3</sup> Heterogeneity: I <sup>2</sup> = 57%<br><sup>4</sup> Sparse data (57 events) and very wide CI                                                                                                                                            |                    |                      |              |                      |                  |                             |                         |                              |                          |                              |                                               |
| <b>Comment:</b> Evidence was sought also for quality of life; however, data were insufficient.                                                                                                                                                                                                                                                                        |                    |                      |              |                      |                  |                             |                         |                              |                          |                              |                                               |
| <b>Abbreviations:</b> N/A, not applicable; RR, risk ratio; CI, confidence interval.                                                                                                                                                                                                                                                                                   |                    |                      |              |                      |                  |                             |                         |                              |                          |                              |                                               |

### Summary of Findings Table 27 (Adalimumab vs placebo)

| PICO question: Adalimumab vs placebo<br>P: Patients with Crohn's disease complex perianal fistulae<br>I: Adalimumab<br>C: No treatment or placebo                                                                                                                                                                                                                                                                                                                                                                                                                                                                                                                                                     |                    |               |                      |                           |                  |                             |                         |                              |                          |                              |                                              |
|-------------------------------------------------------------------------------------------------------------------------------------------------------------------------------------------------------------------------------------------------------------------------------------------------------------------------------------------------------------------------------------------------------------------------------------------------------------------------------------------------------------------------------------------------------------------------------------------------------------------------------------------------------------------------------------------------------|--------------------|---------------|----------------------|---------------------------|------------------|-----------------------------|-------------------------|------------------------------|--------------------------|------------------------------|----------------------------------------------|
| Nr of participants (studies) Follow-up                                                                                                                                                                                                                                                                                                                                                                                                                                                                                                                                                                                                                                                                | Quality assessment |               |                      |                           |                  |                             | Summary of Findings     |                              |                          |                              |                                              |
|                                                                                                                                                                                                                                                                                                                                                                                                                                                                                                                                                                                                                                                                                                       | Risk of bias       | Inconsistency | Indirectness         | Imprecision               | Publication bias | Overall quality of evidence | Study event rates       |                              | Relative effect (95% CI) | Anticipated absolute effects |                                              |
|                                                                                                                                                                                                                                                                                                                                                                                                                                                                                                                                                                                                                                                                                                       |                    |               |                      |                           |                  |                             | Risk with control group | Risk with intervention group |                          | Risk with control group      | Risk difference with intervention group      |
| <b>Fistula healing (critical outcome)</b>                                                                                                                                                                                                                                                                                                                                                                                                                                                                                                                                                                                                                                                             |                    |               |                      |                           |                  |                             |                         |                              |                          |                              |                                              |
| N: 117 (1 study) 56 weeks                                                                                                                                                                                                                                                                                                                                                                                                                                                                                                                                                                                                                                                                             | Not serious        | N/A           | Serious <sup>1</sup> | Serious <sup>2</sup>      | N/A              | Low                         | 6/47 (12.8 %)           | 23/70 (32.9%)                | RR, 2.57 (1.13–5.84)     | 128 per 1000                 | 201 more per 1000 (from 17 more to 618 more) |
| <b>Serious adverse events, SAEs (critical outcome)</b>                                                                                                                                                                                                                                                                                                                                                                                                                                                                                                                                                                                                                                                |                    |               |                      |                           |                  |                             |                         |                              |                          |                              |                                              |
| N: 117 (1 study) 56 weeks                                                                                                                                                                                                                                                                                                                                                                                                                                                                                                                                                                                                                                                                             | Not serious        | N/A           | Serious <sup>1</sup> | Very serious <sup>3</sup> | N/A              | Very low                    | 5/47 (10.6%)            | 9/70 (12.9%)                 | RR, 1.21 (0.43–3.38)     | 106 per 1000                 | 22 more per 1000 (from 60 fewer to 253 more) |
| <p><b>Reference:</b> Colombel JF, Schwartz DA, Sandborn WJ, et al. Adalimumab for the treatment of fistulas in patients with Crohn's disease. <i>Gut</i> 2009; 58(7): 940–948.</p> <p><b>Footnotes:</b><br/> <sup>1</sup> The study population suffered enterocutaneous and/or perianal fistula<br/> <sup>2</sup> Sparse data (29 events)<br/> <sup>3</sup> Sparse data (14 events) and wide CI</p> <p><b>Comment:</b> Evidence was sought also for maintenance of clinical fistula healing, resolution of perianal sepsis, stoma-free survival, and quality of life; however, data were insufficient.</p> <p><b>Abbreviations:</b> N/A, not applicable; RR, risk ratio; CI, confidence interval.</p> |                    |               |                      |                           |                  |                             |                         |                              |                          |                              |                                              |



### Summary of Findings Table 28 (Ustekinumab vs placebo)

| <b>PICO question:</b> Ustekinumab vs placebo<br><b>P:</b> Patients with Crohn's disease complex perianal fistulae<br><b>I:</b> Ustekinumab<br><b>C:</b> No treatment or placebo                                                     |                    |               |              |                      |                  |                             |                         |                              |                          |                              |                                              |
|-------------------------------------------------------------------------------------------------------------------------------------------------------------------------------------------------------------------------------------|--------------------|---------------|--------------|----------------------|------------------|-----------------------------|-------------------------|------------------------------|--------------------------|------------------------------|----------------------------------------------|
| Nr of participants (studies)<br>Follow-up                                                                                                                                                                                           | Quality assessment |               |              |                      |                  |                             | Summary of Findings     |                              |                          |                              |                                              |
|                                                                                                                                                                                                                                     | Risk of bias       | Inconsistency | Indirectness | Imprecision          | Publication bias | Overall quality of evidence | Study event rates       |                              | Relative effect (95% CI) | Anticipated absolute effects |                                              |
|                                                                                                                                                                                                                                     |                    |               |              |                      |                  |                             | Risk with control group | Risk with intervention group |                          | Risk with control group      | Risk difference with intervention group      |
| <b>Induction of fistula remission (critical outcome)</b>                                                                                                                                                                            |                    |               |              |                      |                  |                             |                         |                              |                          |                              |                                              |
| N: 238<br>(1 study)<br>8 weeks                                                                                                                                                                                                      | Not serious        | N/A           | Not serious  | Serious <sup>1</sup> | N/A              | Moderate                    | 10/77 (13.0%)           | 37/161 (23.0%)               | RR, 1.77<br>(0.93–3.37)  | 130 per 1000                 | 100 more per 1000 (from 9 fewer to 308 more) |
| <b>Reference:</b> Lee MJ, Parker CE, Taylor SR, et al. Efficacy of medical therapies for fistulizing Crohn's disease: systematic review and meta-analysis. <i>Clinical Gastroenterology and Hepatology</i> 2018; 16(12): 1879–1892. |                    |               |              |                      |                  |                             |                         |                              |                          |                              |                                              |
| <b>Footnote:</b><br><sup>1</sup> Sparse data (47 events)                                                                                                                                                                            |                    |               |              |                      |                  |                             |                         |                              |                          |                              |                                              |
| <b>Comment:</b> Evidence was sought also for maintenance of fistula remission, serious adverse events, resolution of perianal sepsis, stoma-free survival, and quality of life; however, data were insufficient.                    |                    |               |              |                      |                  |                             |                         |                              |                          |                              |                                              |
| <b>Abbreviations:</b> N/A, not applicable; RR, risk ratio; CI, confidence interval.                                                                                                                                                 |                    |               |              |                      |                  |                             |                         |                              |                          |                              |                                              |

### Summary of Findings Table 29 (Vedolizumab vs placebo)

| PICO question: Vedolizumab vs placebo<br>P: Patients with Crohn's disease complex perianal fistulae<br>I: Vedolizumab<br>C: No treatment or placebo                                                                                                                                                                                                                                                                                                                                                                                                                                                                                                                                                                                                                                                                                                                                            |                    |               |              |                           |                  |                             |                         |                              |                          |                              |                                                  |
|------------------------------------------------------------------------------------------------------------------------------------------------------------------------------------------------------------------------------------------------------------------------------------------------------------------------------------------------------------------------------------------------------------------------------------------------------------------------------------------------------------------------------------------------------------------------------------------------------------------------------------------------------------------------------------------------------------------------------------------------------------------------------------------------------------------------------------------------------------------------------------------------|--------------------|---------------|--------------|---------------------------|------------------|-----------------------------|-------------------------|------------------------------|--------------------------|------------------------------|--------------------------------------------------|
| Nr of participants (studies) Follow-up                                                                                                                                                                                                                                                                                                                                                                                                                                                                                                                                                                                                                                                                                                                                                                                                                                                         | Quality assessment |               |              |                           |                  |                             | Summary of Findings     |                              |                          |                              |                                                  |
|                                                                                                                                                                                                                                                                                                                                                                                                                                                                                                                                                                                                                                                                                                                                                                                                                                                                                                | Risk of bias       | Inconsistency | Indirectness | Imprecision               | Publication bias | Overall quality of evidence | Study event rates       |                              | Relative effect (95% CI) | Anticipated absolute effects |                                                  |
|                                                                                                                                                                                                                                                                                                                                                                                                                                                                                                                                                                                                                                                                                                                                                                                                                                                                                                |                    |               |              |                           |                  |                             | Risk with control group | Risk with intervention group |                          | Risk with control group      | Risk difference with intervention group          |
| <b>Fistula healing (critical outcome)</b>                                                                                                                                                                                                                                                                                                                                                                                                                                                                                                                                                                                                                                                                                                                                                                                                                                                      |                    |               |              |                           |                  |                             |                         |                              |                          |                              |                                                  |
| N: 45<br>(1 study)<br>8 weeks                                                                                                                                                                                                                                                                                                                                                                                                                                                                                                                                                                                                                                                                                                                                                                                                                                                                  | No serious         | N/A           | No serious   | Very serious <sup>1</sup> | N/A              | Low                         | 2/13 (15.4%)            | 11/32 (34.4%)                | RR, 2.23<br>(0.57–8.72)  | 154 per 1000                 | 190 more per 1000<br>(from 66 fewer to 846 more) |
| <p><b>References:</b><br/>           -- Lee MJ, Parker CE, Taylor SR, et al. Efficacy of medical therapies for fistulizing Crohn's disease: systematic review and meta-analysis. <i>Clinical Gastroenterology and Hepatology</i> 2018; 16: 1879-1892.<br/>           -- Feagan BG, Schwartz D, Danese S, et al. Efficacy of vedolizumab in fistulising Crohn's disease: exploratory analyses of data from GEMINI 2. <i>Journal of Crohn's and Colitis</i> 2018; 12: 621-626.</p> <p><b>Footnotes:</b><br/> <sup>1</sup> Sparse data (13 events) and very wide CI</p> <p><b>Comment:</b> Evidence was sought also for maintenance of clinical fistula healing, serious adverse events, quality of life, resolution of perianal sepsis, and stoma free survival; however, data were insufficient.</p> <p><b>Abbreviations:</b> N/A, not applicable; RR, risk ratio; CI, confidence interval.</p> |                    |               |              |                           |                  |                             |                         |                              |                          |                              |                                                  |

### Summary of Findings Table 30 (Antibiotics vs placebo)

| <b>PICO question:</b> Antibiotics vs placebo<br><b>P:</b> Patients with Crohn's disease complex perianal fistulae<br><b>I:</b> Antibiotics<br><b>C:</b> No treatment or placebo                                                                                                 |                    |               |              |                           |                  |                             |                         |                              |                          |                              |                                                  |
|---------------------------------------------------------------------------------------------------------------------------------------------------------------------------------------------------------------------------------------------------------------------------------|--------------------|---------------|--------------|---------------------------|------------------|-----------------------------|-------------------------|------------------------------|--------------------------|------------------------------|--------------------------------------------------|
| Nr of participants (studies)<br>Follow-up                                                                                                                                                                                                                                       | Quality assessment |               |              |                           |                  |                             | Summary of Findings     |                              |                          |                              |                                                  |
|                                                                                                                                                                                                                                                                                 | Risk of bias       | Inconsistency | Indirectness | Imprecision               | Publication bias | Overall quality of evidence | Study event rates       |                              | Relative effect (95% CI) | Anticipated absolute effects |                                                  |
|                                                                                                                                                                                                                                                                                 |                    |               |              |                           |                  |                             | Risk with control group | Risk with intervention group |                          | Risk with control group      | Risk difference with intervention group          |
| <b>Fistula healing (critical outcome)</b>                                                                                                                                                                                                                                       |                    |               |              |                           |                  |                             |                         |                              |                          |                              |                                                  |
| N: 25<br>(1 study)<br>10 weeks                                                                                                                                                                                                                                                  | Not serious        | N/A           | Not serious  | Very serious <sup>1</sup> | N/A              | Low                         | 1/8 (12.5%)             | 3/17 (17.6%)                 | RR, 1.41<br>(0.17–11.54) | 125 per 1000                 | 51 more per 1000<br>(from 103 fewer to 875 more) |
| <b>Reference:</b> Thia K, Mahadevan U, Feagan B, et al. Ciprofloxacin or metronidazole for the treatment of perianal fistulas in patients with Crohn's disease: a randomized, double-blind, placebo-controlled pilot study. <i>Inflammatory Bowel Diseases</i> 2009; 15: 17–24. |                    |               |              |                           |                  |                             |                         |                              |                          |                              |                                                  |
| <b>Footnote:</b><br><sup>1</sup> Sparse data (4 events) and very wide CI                                                                                                                                                                                                        |                    |               |              |                           |                  |                             |                         |                              |                          |                              |                                                  |
| <b>Comment:</b> Evidence was sought also for maintenance of clinical fistula healing, resolution of perianal sepsis, stoma-free survival, and quality of life; however, data were insufficient.                                                                                 |                    |               |              |                           |                  |                             |                         |                              |                          |                              |                                                  |
| <b>Abbreviations:</b> N/A, not applicable; RR, risk ratio; CI, confidence interval.                                                                                                                                                                                             |                    |               |              |                           |                  |                             |                         |                              |                          |                              |                                                  |

**Summary of Findings Table 31** (Thiopurines (azathioprine or 6-mercaptopurine) versus placebo)

| <p><b>PICO question:</b> Thiopurine (azathioprine or 6-mercaptopurine) vs placebo<br/> <b>P:</b> Patients with Crohn's disease complex perianal fistulae<br/> <b>I:</b> Thiopurine (azathioprine or 6-mercaptopurine)<br/> <b>C:</b> No treatment or placebo</p>                                                                                                                                                                                                                                                                                                                                                                                                                                                                                                             |                    |               |                      |                           |                  |                             |                         |                              |                          |                              |                                               |
|------------------------------------------------------------------------------------------------------------------------------------------------------------------------------------------------------------------------------------------------------------------------------------------------------------------------------------------------------------------------------------------------------------------------------------------------------------------------------------------------------------------------------------------------------------------------------------------------------------------------------------------------------------------------------------------------------------------------------------------------------------------------------|--------------------|---------------|----------------------|---------------------------|------------------|-----------------------------|-------------------------|------------------------------|--------------------------|------------------------------|-----------------------------------------------|
| Nr of participants (studies) Follow-up                                                                                                                                                                                                                                                                                                                                                                                                                                                                                                                                                                                                                                                                                                                                       | Quality assessment |               |                      |                           |                  |                             | Summary of Findings     |                              |                          |                              |                                               |
|                                                                                                                                                                                                                                                                                                                                                                                                                                                                                                                                                                                                                                                                                                                                                                              | Risk of bias       | Inconsistency | Indirectness         | Imprecision               | Publication bias | Overall quality of evidence | Study event rates       |                              | Relative effect (95% CI) | Anticipated absolute effects |                                               |
|                                                                                                                                                                                                                                                                                                                                                                                                                                                                                                                                                                                                                                                                                                                                                                              |                    |               |                      |                           |                  |                             | Risk with control group | Risk with intervention group |                          | Risk with control group      | Risk difference with intervention group       |
| <b>Fistula healing (critical outcome)</b>                                                                                                                                                                                                                                                                                                                                                                                                                                                                                                                                                                                                                                                                                                                                    |                    |               |                      |                           |                  |                             |                         |                              |                          |                              |                                               |
| N: 18 (3 studies) 8–24 weeks                                                                                                                                                                                                                                                                                                                                                                                                                                                                                                                                                                                                                                                                                                                                                 | Not serious        | Not serious   | Serious <sup>1</sup> | Very serious <sup>2</sup> | Undetected       | Very low                    | 2/7 (28.6%)             | 6/11 (54.5%)                 | RR, 2.00 (0.67–5.93)     | 286 per 1000                 | 286 more per 1000 (from 94 fewer to 714 more) |
| <p><b>Reference:</b> Chande N, Townsend CM, Parker CE, et al. Azathioprine or 6-mercaptopurine for induction of remission in Crohn's disease. Cochrane Database of Systematic Reviews 2016, Issue 10. Art. No.: CD000545.</p> <p><b>Footnotes:</b><br/> <sup>1</sup> The outcome assessed (fistula improvement or healing) is closely related to, but different from our outcome of interest (fistula healing)<br/> <sup>2</sup> Sparse data (8 events) and wide CI</p> <p><b>Comment:</b> Evidence was sought also for maintenance of clinical fistula healing, serious adverse events, quality of life, resolution of perianal sepsis, and stoma-free survival; however, data were insufficient.</p> <p><b>Abbreviations:</b> RR, risk ratio; CI, confidence interval.</p> |                    |               |                      |                           |                  |                             |                         |                              |                          |                              |                                               |

## Section 5: Supplementary Figures

When needed, we performed our own meta-analysis, using random-effects analytical techniques. In all forest plots, points on the **right side** indicate a **higher risk of the outcome** for the intervention, while points on the left side indicate a higher risk of the outcome for the comparator.

**Supplementary Figure 1** - Forest plot: 5-aminosalicylates or sulphasalazine, vs placebo, to induce clinical remission in patients with Crohn's disease

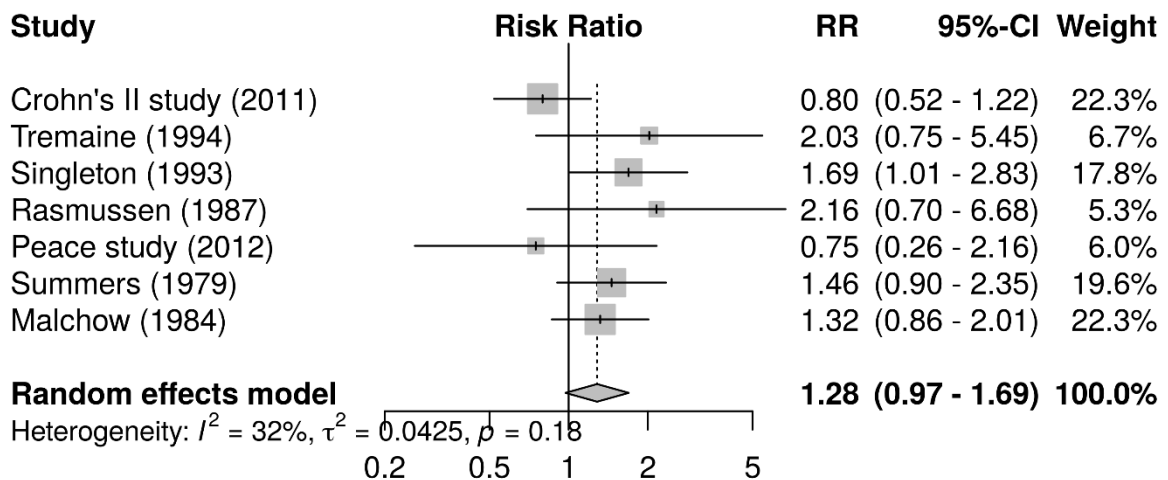

**Supplementary Figure 2** - Forest plot: 5-aminosalicylates or sulphasalazine, vs placebo, risk for adverse effects in the treatment of Crohn's disease

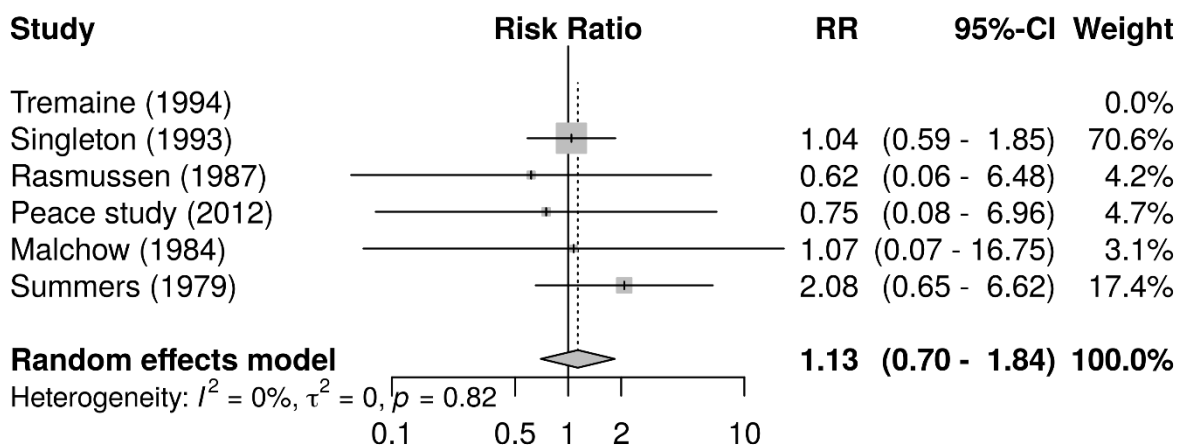

**Supplementary Figure 3** – Forest plot: Forest plot: 5-aminosalicylates, vs placebo, to induce clinical remission in patients with Crohn's disease

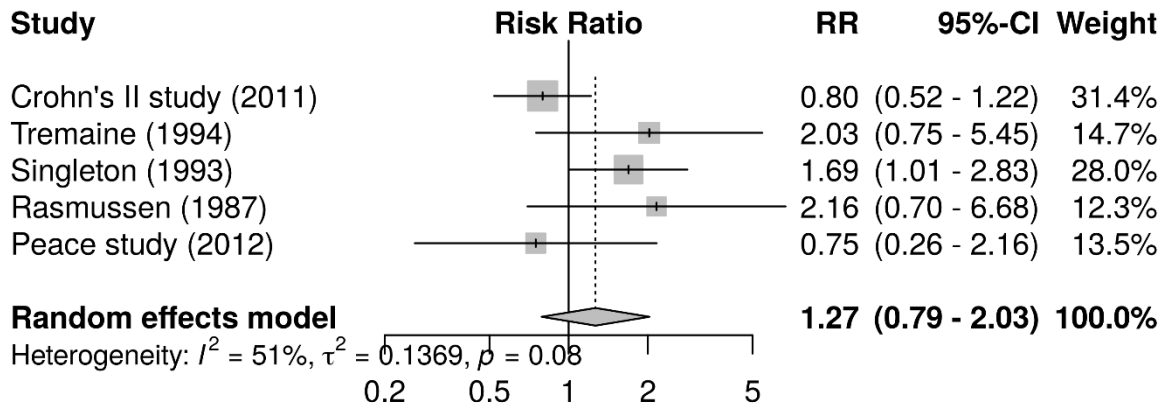

**Supplementary Figure 4** – Forest plot: 5-aminosalicylates, vs placebo, risk for adverse effects in the treatment of Crohn's disease

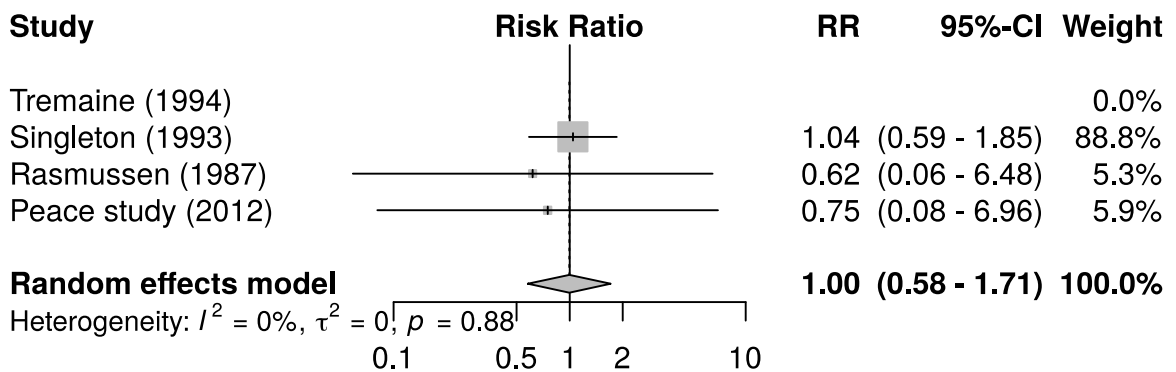

**Supplementary Figure 5** – Forest plot: sulphasalazine, vs placebo, to induce clinical remission in patients with Crohn's disease

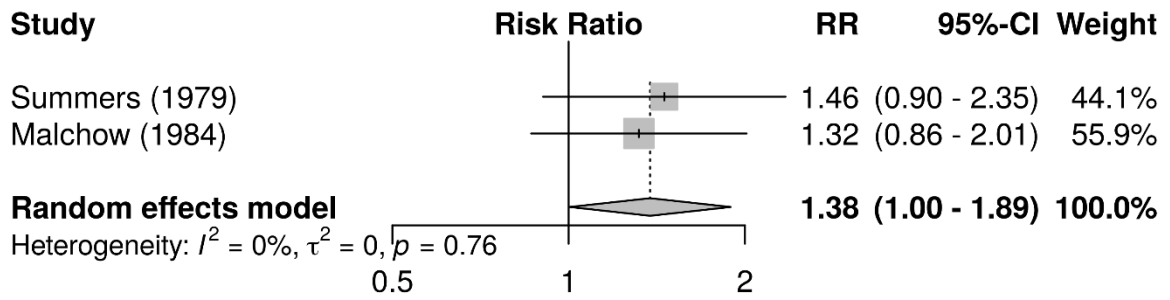

**Supplementary Figure 6** – Forest plot: sulphasalazine, vs placebo, risk for adverse effects in the treatment of Crohn's disease

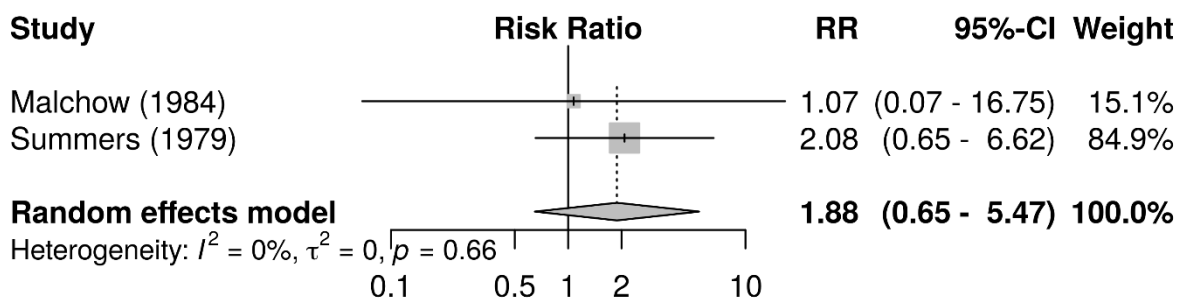

**Supplementary Figure 7** - Forest plot: budesonide vs 5-aminosalicylates, to induce clinical remission in patients with Crohn's disease

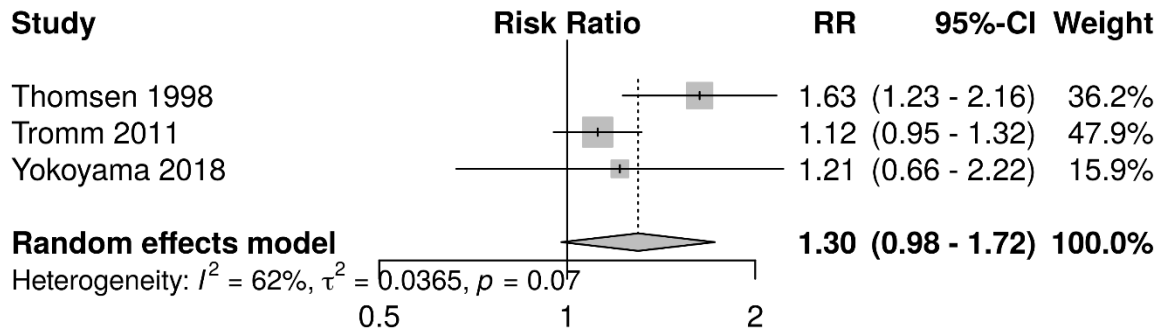

**Supplementary Figure 8** - Forest plot: budesonide vs 5-aminosalicylates, to induce clinical response in patients with Crohn's disease

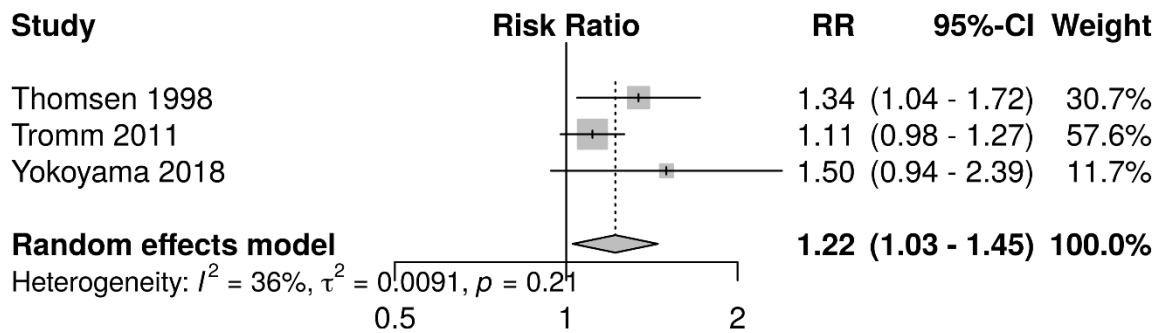



**Supplementary Figure 9** - Forest plot: budesonide vs 5-aminosalicylates, risk for adverse effects in the treatment of Crohn's disease

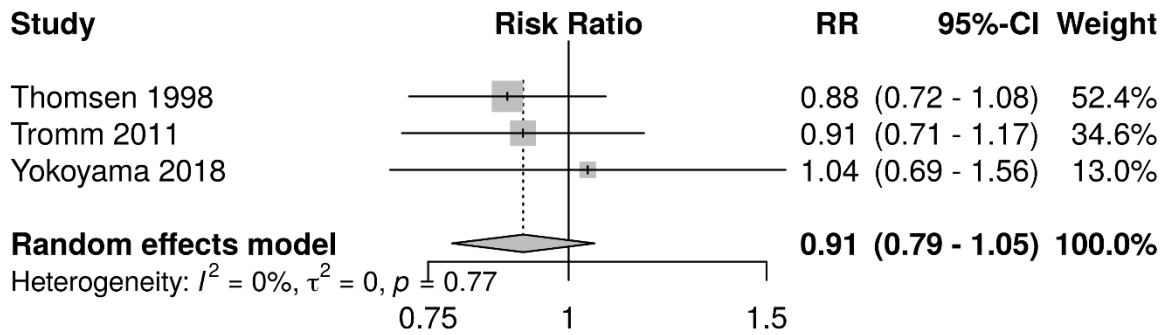

**Supplementary Figure 10** - Forest plot: budesonide vs 5-aminosalicylates, risk for serious adverse effects in the treatment of Crohn's disease

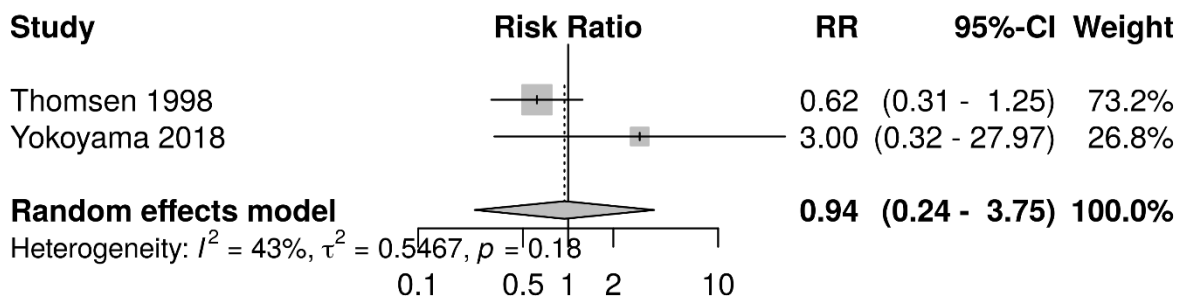

**Supplementary Figure 11** - Forest plot: thiopurines vs placebo, to induce clinical remission in patients with Crohn's disease

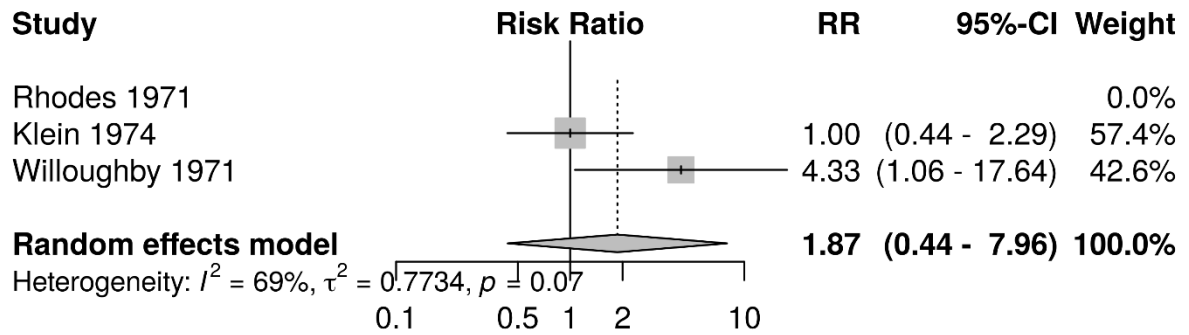

**Supplementary Figure 12** - Forest plot reporting clinical remission of methotrexate as compared to thiopurines

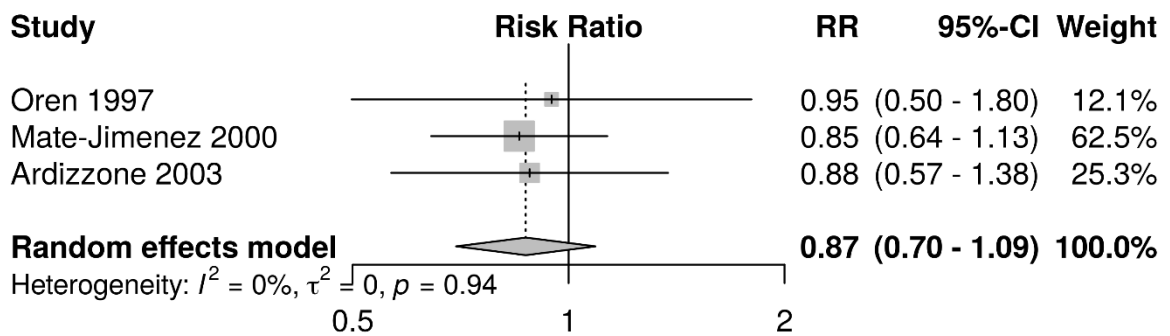

**Supplementary Figure 13** - Forest plot: ustekinumab vs placebo, to induce clinical response in patients with Crohn's disease

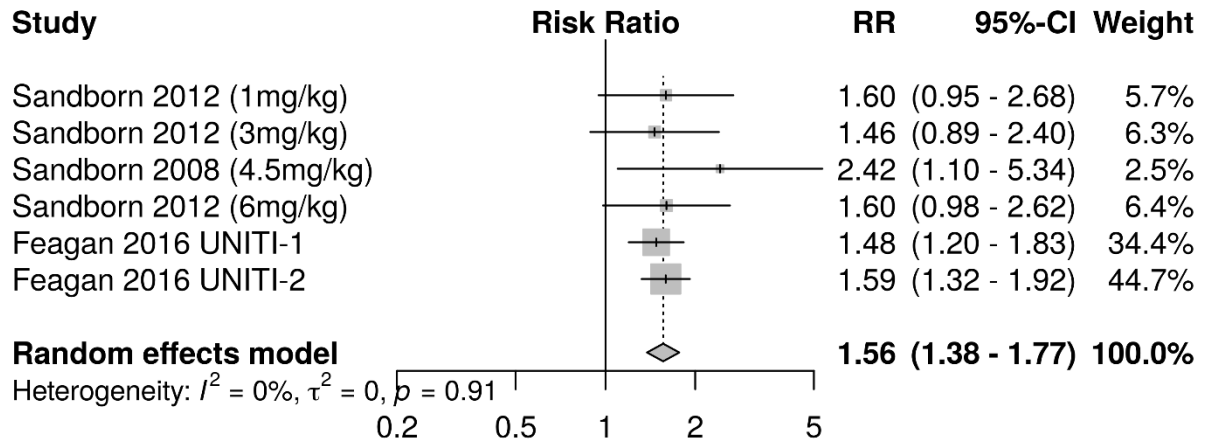

**Supplementary Figure 14** - Forest plot: ustekinumab vs placebo, to induce clinical remission in patients with Crohn's disease

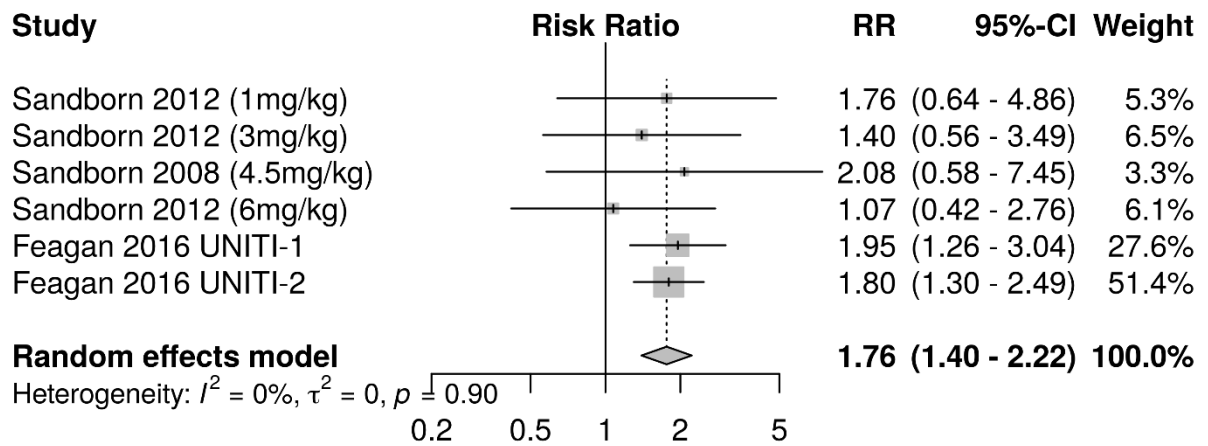

**Supplementary Figure 15** - Forest plot: ustekinumab vs placebo, risk for adverse effects in the treatment of Crohn's disease

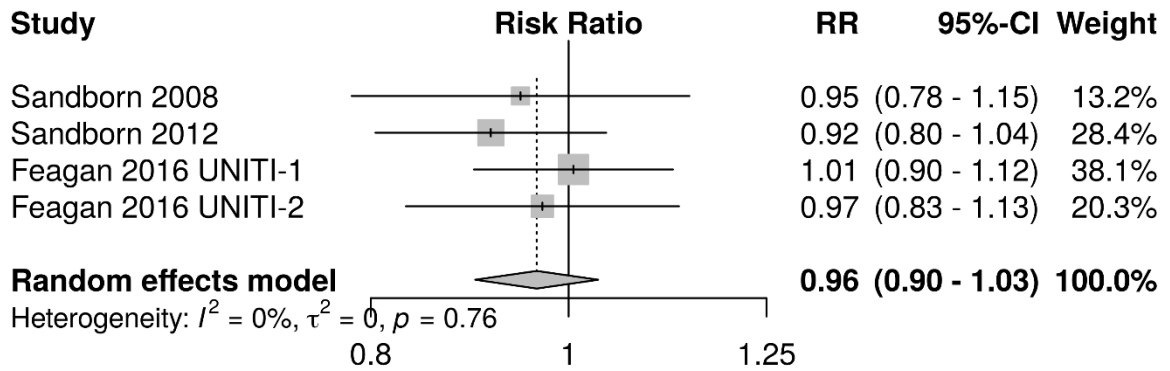

**Supplementary Figure 16** - Forest plot: ustekinumab vs placebo, risk for serious adverse effects in the treatment of Crohn's disease

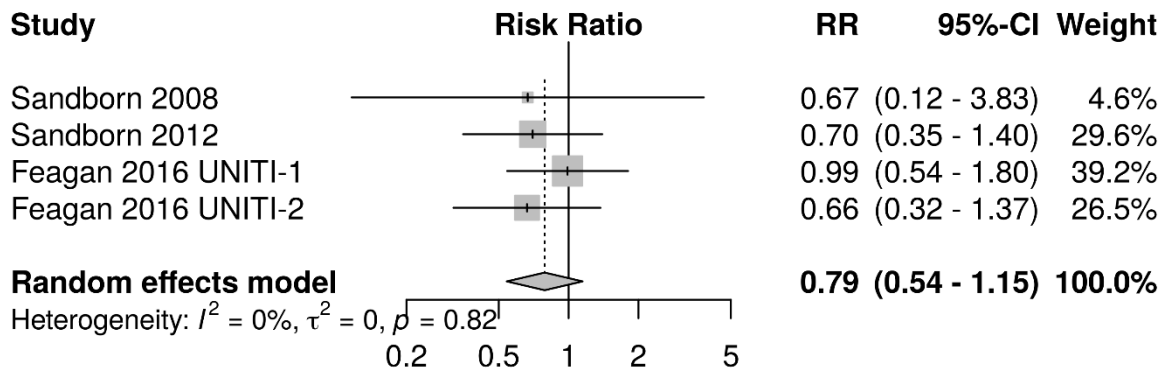

**Supplementary Figure 17** - Forest plot: vedolizumab vs placebo, to induce clinical remission in patients with Crohn's disease

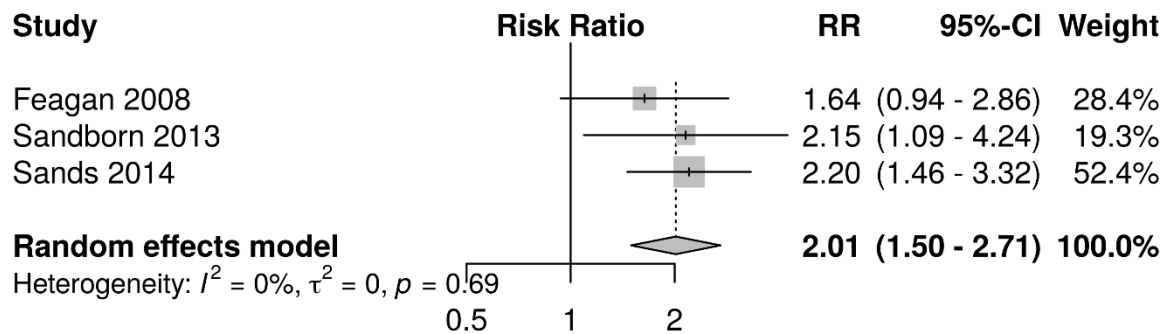

**Supplementary Figure 18**- Forest plot: vedolizumab vs placebo, to induce clinical response in patients with Crohn's disease

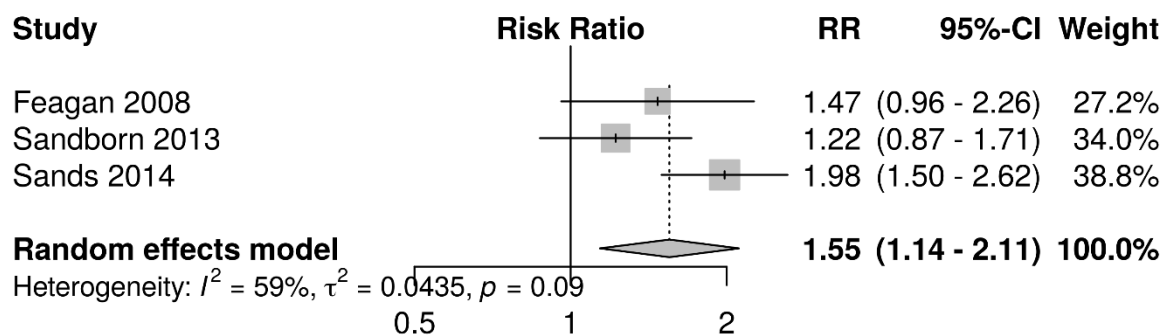

**Supplementary Figure 19** - Forest plot: vedolizumab vs placebo, risk for serious adverse effects in the treatment of Crohn's disease

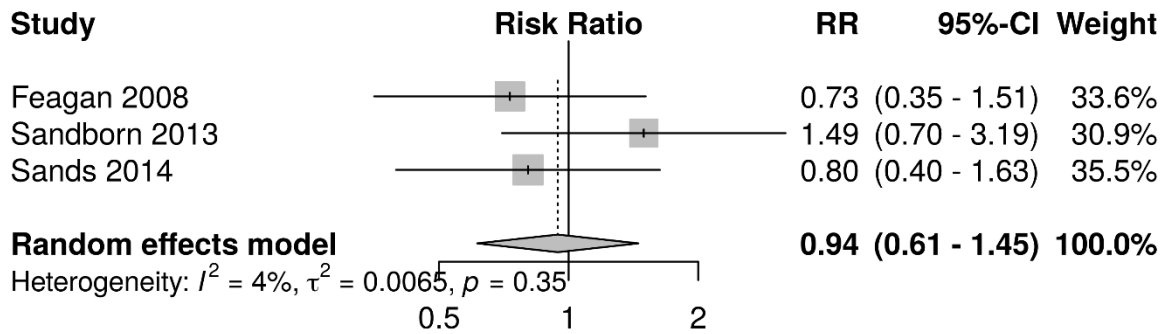

**Supplementary Figure 20** - Forest plot: 5-ASA vs placebo, to maintain clinical remission in patients with Crohn's disease

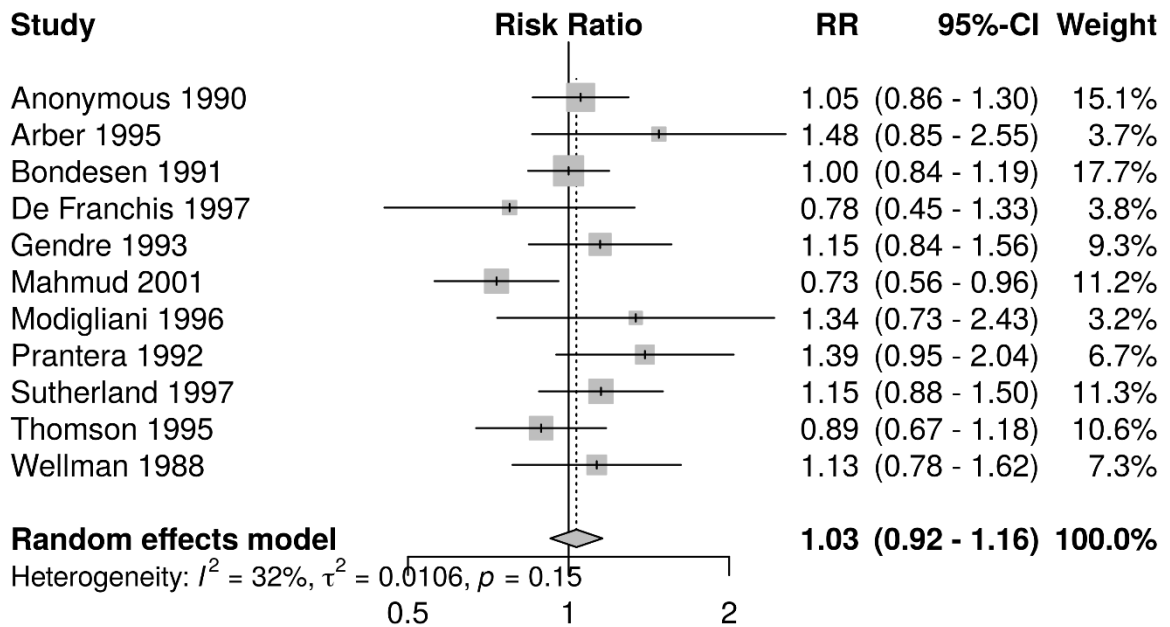

**Supplementary Figure 21** - Forest plot: 5-ASA vs placebo, risk for adverse effects during maintenance treatment of Crohn's disease

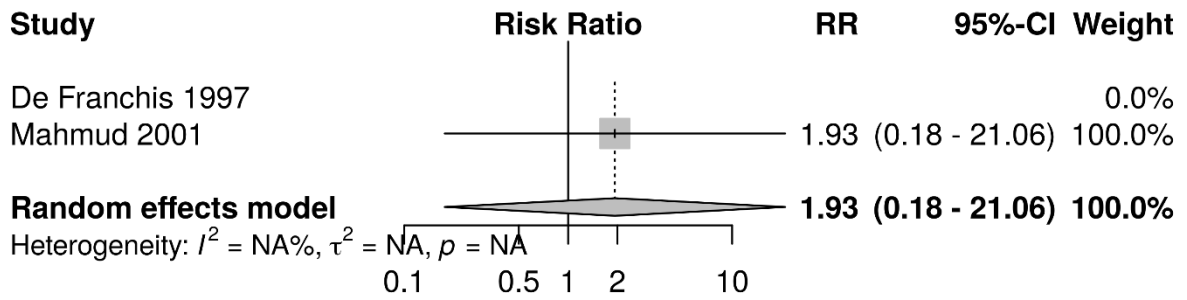

**Supplementary Figure 22** - Forest plot: thiopurine discontinuation, vs no discontinuation, risk for relapse in patients with Crohn's disease in clinical remission

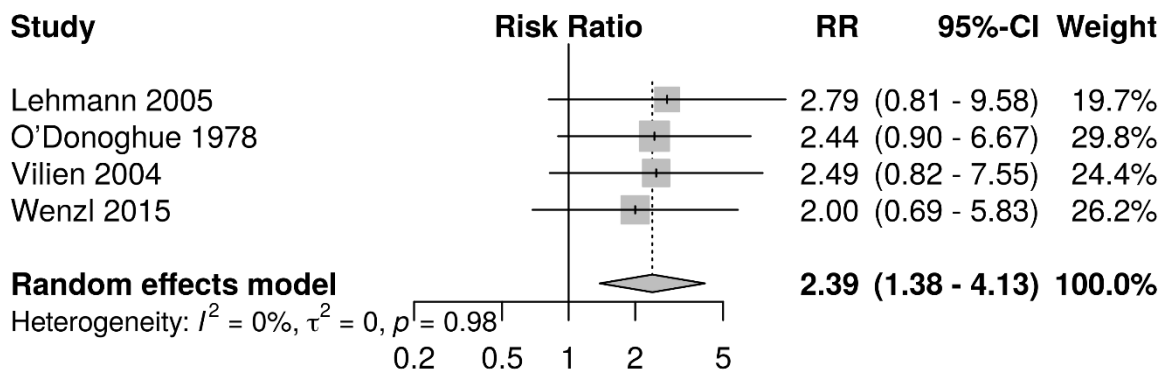

**Supplementary Figure 23** - Forest plot: thiopurine discontinuation, vs no discontinuation, risk for serious adverse effects in patients with Crohn's disease in clinical remission

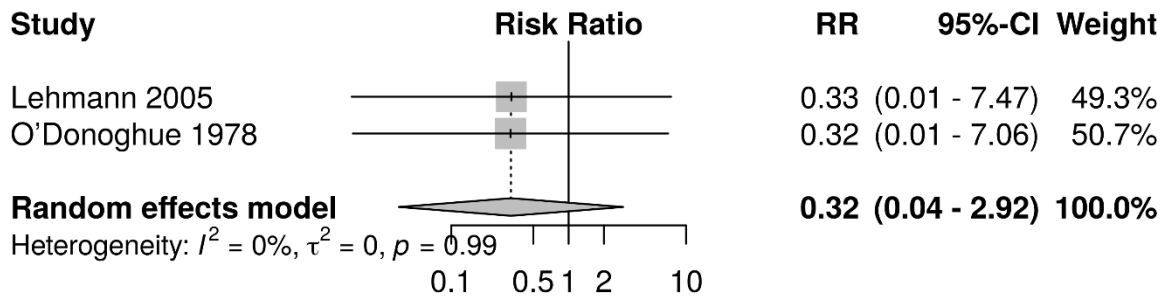

**Supplementary Figure 24** - Forest plot: combination treatment with adalimumab and thiopurines, vs treatment with adalimumab only, for maintenance of remission in patients with Crohn's disease

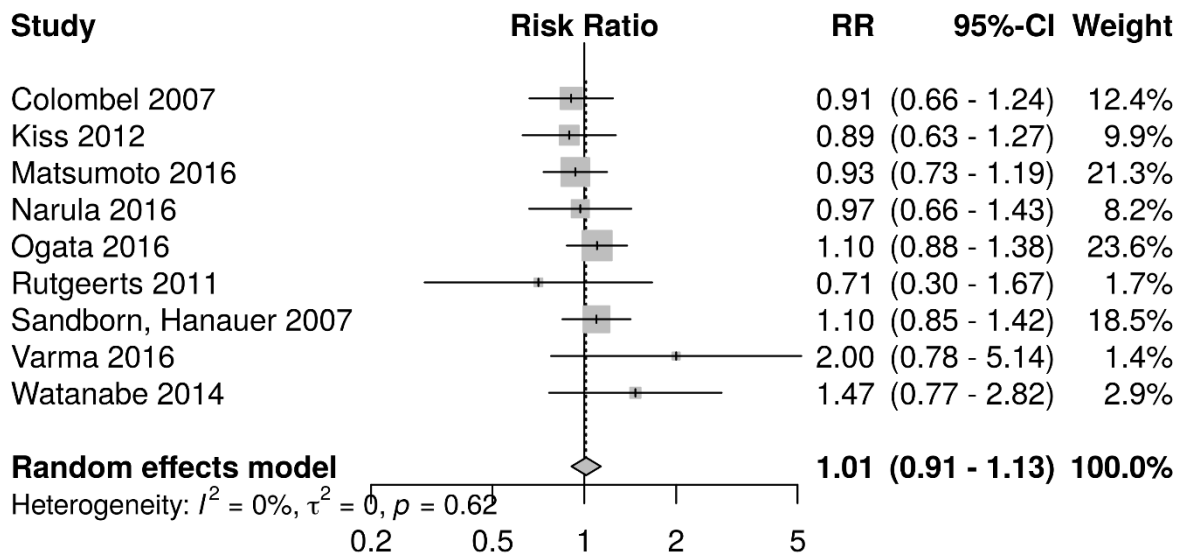



**Supplementary Figure 25** - Forest plot: combination treatment with adalimumab and thiopurines, vs treatment with adalimumab only, risk for serious adverse effects in patients with Crohn's disease under treatment for maintenance of remission

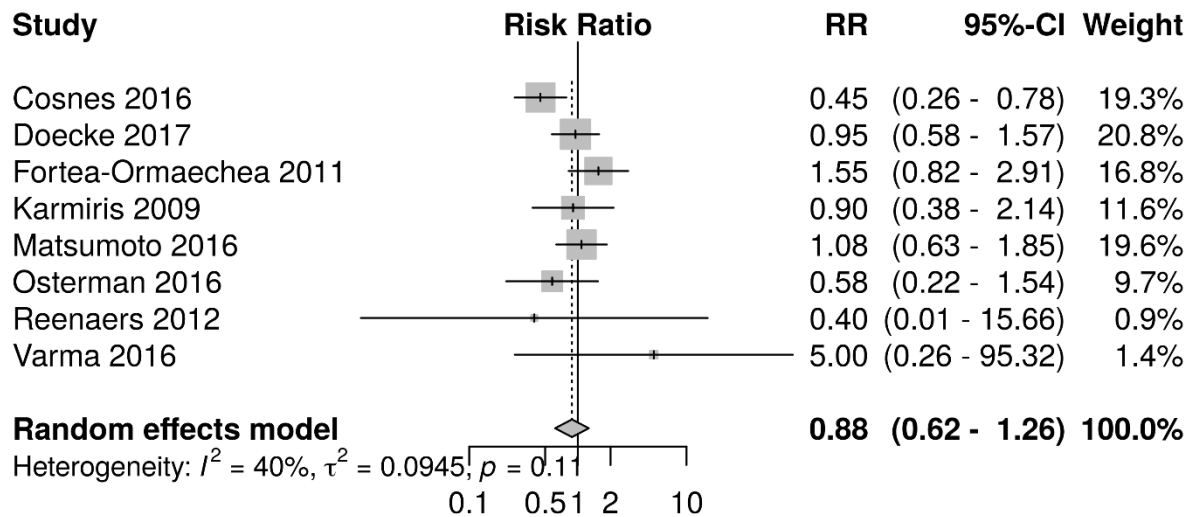

**Supplementary Figure 26** - Forest plot: infliximab vs placebo, risk for serious adverse effects in patients with Crohn's disease and complex perianal fistulae

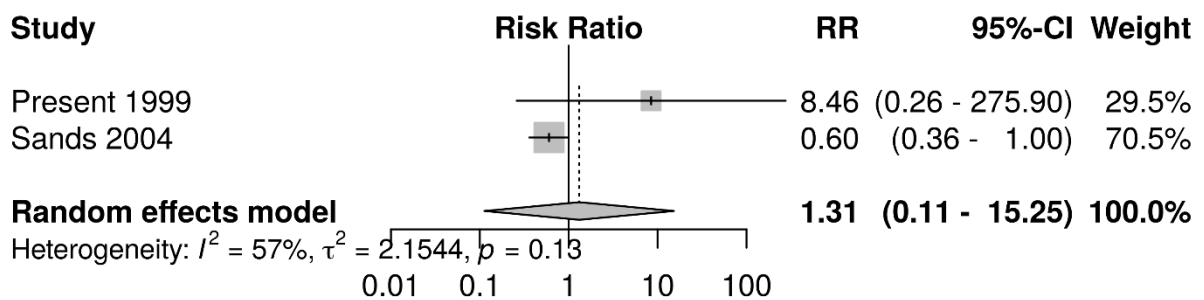

Supplement: jjz180_suppl_supplementary_material.pdf [file jjz180_suppl_supplementary_material.pdf]
