# Supplementary material
Source: Oxford University Press journal article supplement (doi:10.1093/ecco-jcc_jjz180)
Supplement: jjz180_suppl_supplementary_file_1.xlsx [file jjz180_suppl_supplementary_file_1.xlsx]

## Sheet: 5-ASA versus Placebo
Meta analyses / Syst. Reviews				RCTs				Observational Studies
WG 1 - Induction 5-ASA vs Placebo				WG 1 - Induction 5-ASA vs Placebo				WG 1 - Induction 5-ASA vs Placebo
Nr.	Query	Treffer		Nr.	Query	Treffer		Nr.	Query	Treffer
#1	"Crohn Disease"[Mesh] OR ((Crohn's[tiab] OR Crohns[tiab]) AND (disease[tiab] OR enteritis[tiab]))	48420		#1	"Crohn Disease"[Mesh] OR ((Crohn's[tiab] OR Crohns[tiab]) AND (disease[tiab] OR enteritis[tiab]))	49023		#1	"Crohn Disease"[Mesh] OR ((Crohn's[tiab] OR Crohns[tiab]) AND (disease[tiab] OR enteritis[tiab]))	49023
#2	((Enteritis[tiab] OR ileiti*[tiab]) AND (regional[tiab] OR terminal[tiab]))	2369		#2	((Enteritis[tiab] OR ileiti*[tiab]) AND (regional[tiab] OR terminal[tiab]))	2374		#2	((Enteritis[tiab] OR ileiti*[tiab]) AND (regional[tiab] OR terminal[tiab]))	2374
#3	((Granulomatous[tiab]) AND (colitis[tiab] OR enteritis[tiab])) OR ileocolitis[tiab] OR Inflammatory bowel disease 1[tiab]	1291		#3	((Granulomatous[tiab]) AND (colitis[tiab] OR enteritis[tiab])) OR ileocolitis[tiab] OR Inflammatory bowel disease 1[tiab]	1304		#3	((Granulomatous[tiab]) AND (colitis[tiab] OR enteritis[tiab])) OR ileocolitis[tiab] OR Inflammatory bowel disease 1[tiab]	1304
#4	#1 OR #2 OR #3	49373		#4	#1 OR #2 OR #3	49987		#4	#1 OR #2 OR #3	49987
Interventionen				Interventionen				Interventionen
#5	"Aminosalicylic Acids"[Mesh] OR "Aminosalicylic Acid"[Mesh] OR Aminosalicyl*[tiab]	10497		#5	"Aminosalicylic Acids"[Mesh] OR "Aminosalicylic Acid"[Mesh] OR Aminosalicyl*[tiab]	10561		#5	"Aminosalicylic Acids"[Mesh] OR "Aminosalicylic Acid"[Mesh] OR Aminosalicyl*[tiab]	10561
#6	Mesalamine[Mesh] OR Mesalamin*[tiab] OR Mesalazin*[tiab] OR 5-ASA[tiab] OR ASA[tiab]	26041		#6	Mesalamine[Mesh] OR Mesalamin*[tiab] OR Mesalazin*[tiab] OR 5-ASA[tiab] OR ASA[tiab]	26404		#6	Mesalamine[Mesh] OR Mesalamin*[tiab] OR Mesalazin*[tiab] OR 5-ASA[tiab] OR ASA[tiab]	26404
#7	Asacol*[tiab] OR Ascolitin[tiab] OR Canasa[tiab] OR Claversal[tiab] OR Fivasa[tiab] OR Salofalk[tiab] OR Lixacol[tiab] OR Mesasal[tiab] OR Pentasa[tiab] OR Rowasa[tiab]	277		#7	Asacol*[tiab] OR Ascolitin[tiab] OR Canasa[tiab] OR Claversal[tiab] OR Fivasa[tiab] OR Salofalk[tiab] OR Lixacol[tiab] OR Mesasal[tiab] OR Pentasa[tiab] OR Rowasa[tiab]	277		#7	Asacol*[tiab] OR Ascolitin[tiab] OR Canasa[tiab] OR Claversal[tiab] OR Fivasa[tiab] OR Salofalk[tiab] OR Lixacol[tiab] OR Mesasal[tiab] OR Pentasa[tiab] OR Rowasa[tiab]	277
#8	#5 OR #6 OR #7	32934		#8	#5 OR #6 OR #7	33320		#8	#5 OR #6 OR #7	33320
Suchzeitraum				Suchzeitraum				Suchzeitraum
#9	#4 AND #8	1835		#9	#4 AND #8	1852		#9	#4 AND #8	1852
#10	(systematic*[tiab] AND (bibliographic*[TIAB] OR literature[tiab] OR review[tiab] OR reviewed[tiab] OR reviews[tiab])) OR (comprehensive*[TIAB] AND (bibliographic*[TIAB] OR literature[tiab])) OR “cochrane database syst rev”[Journal] OR "Evidencereport/technology assessment (Summary)"[journal] OR "Evidence report/technology assessment"[journal] OR "integrative literature review"[tiab] OR "integrati…	451072		#10	"Clinical Trial" [PT:NoExp] OR "clinical trial, phase i"[pt] OR "clinical trial, phase ii"[pt] OR "clinical trial, phase iii"[pt] OR "clinical trial, phase iv"[pt] OR "controlled clinical trial"[pt] OR "multicenter study"[pt] OR "randomized controlled trial"[pt] OR "Clinical Trials as Topic"[mesh:noexp] OR "clinical trials, phase i as topic"[MeSH Terms:noexp] OR "clinical trials, phase ii as topi…	1314764		#10	“Case-Control Studies”[Mesh:noexp] OR "retrospective studies"[mesh:noexp] OR “Control Groups”[Mesh:noexp] OR (case[TIAB] AND control[TIAB]) OR (cases[TIAB] AND controls[TIAB]) OR (cases[TIAB] AND controlled[TIAB]) OR (case[TIAB] AND comparison*[TIAB]) OR (cases[TIAB] AND comparison*[TIAB]) OR “control group”[TIAB] OR “control groups”[TIAB] OR cohort studies[mesh:noexp] OR longitudinal studies[mes…	3607673
#11	animals[mh] NOT humans[mh]	4440069		#11	animals[mh] NOT humans[mh]	4469938		#11	animals[mh] NOT humans[mh]	4469938
#12	#10 NOT #11	441889		#12	#11 NOT #12	1291336		#12	#11 NOT #12	3398953
#13	#9 AND #12	184		#13	#9 AND #12 and publication date: 1998- date of search	297		#13	#9 AND #12 and publication date: 1998- date of search	456
Date	04th April.2018				2018-07-03				2018-07-03
Search term	(((((systematic*[tiab] AND (bibliographic*[TIAB] OR literature[tiab] OR review[tiab] OR reviewed[tiab] OR reviews[tiab])) OR (comprehensive*[TIAB] AND (bibliographic*[TIAB] OR literature[tiab])) OR “cochrane database syst rev”[Journal] OR "Evidencereport/technology assessment (Summary)"[journal] OR "Evidence report/technology assessment"[journal] OR "integrative literature review"[tiab] OR "integ…				((((((((((Granulomatous[tiab]) AND (colitis[tiab] OR enteritis[tiab])) OR ileocolitis[tiab] OR Inflammatory bowel disease 1[tiab])) OR (((Enteritis[tiab] OR ileiti*[tiab]) AND (regional[tiab] OR terminal[tiab])))) OR ("Crohn Disease"[Mesh] OR ((Crohn's[tiab] OR Crohns[tiab]) AND (disease[tiab] OR enteritis[tiab]))))) AND (((("Aminosalicylic Acids"[Mesh] OR "Aminosalicylic Acid"[Mesh] OR Aminosali…				(((((((((Granulomatous[tiab]) AND (colitis[tiab] OR enteritis[tiab])) OR ileocolitis[tiab] OR Inflammatory bowel disease 1[tiab])) OR (((Enteritis[tiab] OR ileiti*[tiab]) AND (regional[tiab] OR terminal[tiab])))) OR ("Crohn Disease"[Mesh] OR ((Crohn's[tiab] OR Crohns[tiab]) AND (disease[tiab] OR enteritis[tiab]))))) AND (((("Aminosalicylic Acids"[Mesh] OR "Aminosalicylic Acid"[Mesh] OR Aminosalic…

## Sheet: Budesonide versus Placebo
Meta analyses / Syst. Reviews				RCTs				Observational Studies
WG 1 - Induction Budenoside vs Placebo
Nr.	Query	Treffer		Nr.	Query	Treffer		Nr.	Query	Treffer
#1	"Crohn Disease"[Mesh] OR ((Crohn's[tiab] OR Crohns[tiab]) AND (disease[tiab] OR enteritis[tiab]))	48420		#1	"Crohn Disease"[Mesh] OR ((Crohn's[tiab] OR Crohns[tiab]) AND (disease[tiab] OR enteritis[tiab]))	49023		#1	"Crohn Disease"[Mesh] OR ((Crohn's[tiab] OR Crohns[tiab]) AND (disease[tiab] OR enteritis[tiab]))	49023
#2	((Enteritis[tiab] OR ileiti*[tiab]) AND (regional[tiab] OR terminal[tiab]))	2369		#2	((Enteritis[tiab] OR ileiti*[tiab]) AND (regional[tiab] OR terminal[tiab]))	2374		#2	((Enteritis[tiab] OR ileiti*[tiab]) AND (regional[tiab] OR terminal[tiab]))	2374
#3	((Granulomatous[tiab]) AND (colitis[tiab] OR enteritis[tiab])) OR ileocolitis[tiab] OR Inflammatory bowel disease 1[tiab]	1291		#3	((Granulomatous[tiab]) AND (colitis[tiab] OR enteritis[tiab])) OR ileocolitis[tiab] OR Inflammatory bowel disease 1[tiab]	1304		#3	((Granulomatous[tiab]) AND (colitis[tiab] OR enteritis[tiab])) OR ileocolitis[tiab] OR Inflammatory bowel disease 1[tiab]	1304
#4	#1 OR #2 OR #3	49373		#4	#1 OR #2 OR #3	49987		#4	#1 OR #2 OR #3	49987
Interventionen				Interventionen				Interventionen
#5	Budesonide[Mesh] OR Budenosid*[tiab] OR Horacort[tiab] OR Pulmicort[tiab] OR Rhinocort[tiab]	4155		#5	Budesonide[Mesh] OR Budenosid*[tiab] OR Horacort[tiab] OR Pulmicort[tiab] OR Rhinocort[tiab]	4189		#5	Budesonide[Mesh] OR Budenosid*[tiab] OR Horacort[tiab] OR Pulmicort[tiab] OR Rhinocort[tiab]	4189
Suchzeitraum				Suchzeitraum				Suchzeitraum
#6	#4 AND #5	262		#6	#4 AND #5	265		#6	#4 AND #5	265
#7	(systematic*[tiab] AND (bibliographic*[TIAB] OR literature[tiab] OR review[tiab] OR reviewed[tiab] OR reviews[tiab])) OR (comprehensive*[TIAB] AND (bibliographic*[TIAB] OR literature[tiab])) OR “cochrane database syst rev”[Journal] OR "Evidencereport/technology assessment (Summary)"[journal] OR "Evidence report/technology assessment"[journal] OR "integrative literature review"[tiab] OR "integrati…	451072		#7	"Clinical Trial" [PT:NoExp] OR "clinical trial, phase i"[pt] OR "clinical trial, phase ii"[pt] OR "clinical trial, phase iii"[pt] OR "clinical trial, phase iv"[pt] OR "controlled clinical trial"[pt] OR "multicenter study"[pt] OR "randomized controlled trial"[pt] OR "Clinical Trials as Topic"[mesh:noexp] OR "clinical trials, phase i as topic"[MeSH Terms:noexp] OR "clinical trials, phase ii as topi…	1314764		#7	“Case-Control Studies”[Mesh:noexp] OR "retrospective studies"[mesh:noexp] OR “Control Groups”[Mesh:noexp] OR (case[TIAB] AND control[TIAB]) OR (cases[TIAB] AND controls[TIAB]) OR (cases[TIAB] AND controlled[TIAB]) OR (case[TIAB] AND comparison*[TIAB]) OR (cases[TIAB] AND comparison*[TIAB]) OR “control group”[TIAB] OR “control groups”[TIAB] OR cohort studies[mesh:noexp] OR longitudinal studies[mes…	3607673
#8	animals[mh] NOT humans[mh]	4440069		#8	animals[mh] NOT humans[mh]	4469938		#8	animals[mh] NOT humans[mh]	4469938
#9	#7 NOT #8	441889		#9	#11 NOT #12	1291336		#9	#11 NOT #12	3398953
#10	#6 AND #9	34		#10	#6 AND #9 and publication date: 1998- date of search	113		#10	#6 AND #9 and publication date: 1998- date of search	57
Date	04th April.2018				2018-07-03				2018-07-03
Search term	((((Budesonide[Mesh] OR Budenosid*[tiab] OR Horacort[tiab] OR Pulmicort[tiab] OR Rhinocort[tiab])) AND (((("Crohn Disease"[Mesh] OR ((Crohn's[tiab] OR Crohns[tiab]) AND (disease[tiab] OR enteritis[tiab])))) OR (((Enteritis[tiab] OR ileiti*[tiab]) AND (regional[tiab] OR terminal[tiab])))) OR (((Granulomatous[tiab]) AND (colitis[tiab] OR enteritis[tiab])) OR ileocolitis[tiab] OR Inflammatory bowel …				(((((("Clinical Trial" [PT:NoExp] OR "clinical trial, phase i"[pt] OR "clinical trial, phase ii"[pt] OR "clinical trial, phase iii"[pt] OR "clinical trial, phase iv"[pt] OR "controlled clinical trial"[pt] OR "multicenter study"[pt] OR "randomized controlled trial"[pt] OR "Clinical Trials as Topic"[mesh:noexp] OR "clinical trials, phase i as topic"[MeSH Terms:noexp] OR "clinical trials, phase ii a…				((((“Case-Control Studies”[Mesh:noexp] OR "retrospective studies"[mesh:noexp] OR “Control Groups”[Mesh:noexp] OR (case[TIAB] AND control[TIAB]) OR (cases[TIAB] AND controls[TIAB]) OR (cases[TIAB] AND controlled[TIAB]) OR (case[TIAB] AND comparison*[TIAB]) OR (cases[TIAB] AND comparison*[TIAB]) OR “control group”[TIAB] OR “control groups”[TIAB] OR cohort studies[mesh:noexp] OR longitudinal studies…

## Sheet: Budesonide versus 5-ASA
Meta analyses / Syst. Reviews				RCTs				Observational Studies
WG 1 - Induction 5-ASA vs Budesonide				WG 1 - Induction 5-ASA vs Budesonide				WG 1 - Induction 5-ASA vs Budesonide
Nr.	Query	Treffer		Nr.	Query	Treffer		Nr.	Query	Treffer
#1	"Crohn Disease"[Mesh] OR ((Crohn's[tiab] OR Crohns[tiab]) AND (disease[tiab] OR enteritis[tiab]))	48420		#1	"Crohn Disease"[Mesh] OR ((Crohn's[tiab] OR Crohns[tiab]) AND (disease[tiab] OR enteritis[tiab]))	49023		#1	"Crohn Disease"[Mesh] OR ((Crohn's[tiab] OR Crohns[tiab]) AND (disease[tiab] OR enteritis[tiab]))	49023
#2	((Enteritis[tiab] OR ileiti*[tiab]) AND (regional[tiab] OR terminal[tiab]))	2369		#2	((Enteritis[tiab] OR ileiti*[tiab]) AND (regional[tiab] OR terminal[tiab]))	2374		#2	((Enteritis[tiab] OR ileiti*[tiab]) AND (regional[tiab] OR terminal[tiab]))	2374
#3	((Granulomatous[tiab]) AND (colitis[tiab] OR enteritis[tiab])) OR ileocolitis[tiab] OR Inflammatory bowel disease 1[tiab]	1291		#3	((Granulomatous[tiab]) AND (colitis[tiab] OR enteritis[tiab])) OR ileocolitis[tiab] OR Inflammatory bowel disease 1[tiab]	1304		#3	((Granulomatous[tiab]) AND (colitis[tiab] OR enteritis[tiab])) OR ileocolitis[tiab] OR Inflammatory bowel disease 1[tiab]	1304
#4	#1 OR #2 OR #3	49373		#4	#1 OR #2 OR #3	49987		#4	#1 OR #2 OR #3	49987
Interventionen				Interventionen				Interventionen
#5	"Aminosalicylic Acids"[Mesh] OR "Aminosalicylic Acid"[Mesh] OR Aminosalicyl*[tiab]	10497		#5	"Aminosalicylic Acids"[Mesh] OR "Aminosalicylic Acid"[Mesh] OR Aminosalicyl*[tiab]	10561		#5	"Aminosalicylic Acids"[Mesh] OR "Aminosalicylic Acid"[Mesh] OR Aminosalicyl*[tiab]	10561
#6	Mesalamine[Mesh] OR Mesalamin*[tiab] OR Mesalazin*[tiab] OR 5-ASA[tiab] OR ASA[tiab]	26041		#6	Mesalamine[Mesh] OR Mesalamin*[tiab] OR Mesalazin*[tiab] OR 5-ASA[tiab] OR ASA[tiab]	26404		#6	Mesalamine[Mesh] OR Mesalamin*[tiab] OR Mesalazin*[tiab] OR 5-ASA[tiab] OR ASA[tiab]	26404
#7	Asacol*[tiab] OR Ascolitin[tiab] OR Canasa[tiab] OR Claversal[tiab] OR Fivasa[tiab] OR Salofalk[tiab] OR Lixacol[tiab] OR Mesasal[tiab] OR Pentasa[tiab] OR Rowasa[tiab]	277		#7	Asacol*[tiab] OR Ascolitin[tiab] OR Canasa[tiab] OR Claversal[tiab] OR Fivasa[tiab] OR Salofalk[tiab] OR Lixacol[tiab] OR Mesasal[tiab] OR Pentasa[tiab] OR Rowasa[tiab]	277		#7	Asacol*[tiab] OR Ascolitin[tiab] OR Canasa[tiab] OR Claversal[tiab] OR Fivasa[tiab] OR Salofalk[tiab] OR Lixacol[tiab] OR Mesasal[tiab] OR Pentasa[tiab] OR Rowasa[tiab]	277
#8	#5 OR #6 OR #7	32934		#8	#5 OR #6 OR #7	33320		#8	#5 OR #6 OR #7	33320
#9	Budesonide[Mesh] OR Budenosid*[tiab] OR Horacort[tiab] OR Pulmicort[tiab] OR Rhinocort[tiab]	4155		#9	Budesonide[Mesh] OR Budenosid*[tiab] OR Horacort[tiab] OR Pulmicort[tiab] OR Rhinocort[tiab]	4189		#9	Budesonide[Mesh] OR Budenosid*[tiab] OR Horacort[tiab] OR Pulmicort[tiab] OR Rhinocort[tiab]	4189
#10	#8 AND #9	159		#10	#8 AND #9	161		#10	#8 AND #9	161
Suchzeitraum				Suchzeitraum				Suchzeitraum
#11	#4 AND #10	98		#11	#4 AND #10	99		#11	#4 AND #10	99
#12	(systematic*[tiab] AND (bibliographic*[TIAB] OR literature[tiab] OR review[tiab] OR reviewed[tiab] OR reviews[tiab])) OR (comprehensive*[TIAB] AND (bibliographic*[TIAB] OR literature[tiab])) OR “cochrane database syst rev”[Journal] OR "Evidencereport/technology assessment (Summary)"[journal] OR "Evidence report/technology assessment"[journal] OR "integrative literature review"[tiab] OR "integrati…	451072		#12	"Clinical Trial" [PT:NoExp] OR "clinical trial, phase i"[pt] OR "clinical trial, phase ii"[pt] OR "clinical trial, phase iii"[pt] OR "clinical trial, phase iv"[pt] OR "controlled clinical trial"[pt] OR "multicenter study"[pt] OR "randomized controlled trial"[pt] OR "Clinical Trials as Topic"[mesh:noexp] OR "clinical trials, phase i as topic"[MeSH Terms:noexp] OR "clinical trials, phase ii as topi…	1314764		#12	“Case-Control Studies”[Mesh:noexp] OR "retrospective studies"[mesh:noexp] OR “Control Groups”[Mesh:noexp] OR (case[TIAB] AND control[TIAB]) OR (cases[TIAB] AND controls[TIAB]) OR (cases[TIAB] AND controlled[TIAB]) OR (case[TIAB] AND comparison*[TIAB]) OR (cases[TIAB] AND comparison*[TIAB]) OR “control group”[TIAB] OR “control groups”[TIAB] OR cohort studies[mesh:noexp] OR longitudinal studies[mes…	3607673
#13	animals[mh] NOT humans[mh]	4440069		#13	animals[mh] NOT humans[mh]	4469938		#13	animals[mh] NOT humans[mh]	4469938
#14	#12 NOT #13	441889		#14	#11 NOT #12	1291336		#14	#11 NOT #12	3398953
#15	#11 AND #14	25		#15	#11 AND #14 and publication date: 1998- date of search	47		#15	#11 AND #14 and publication date: 1998- date of search	21
Date	04th April.2018				2018-07-03				2018-07-03
Search term	((((((Budesonide[Mesh] OR Budenosid*[tiab] OR Horacort[tiab] OR Pulmicort[tiab] OR Rhinocort[tiab])) AND ((((("Aminosalicylic Acids"[Mesh] OR "Aminosalicylic Acid"[Mesh] OR Aminosalicyl*[tiab]))) OR (Mesalamine[Mesh] OR Mesalamin*[tiab] OR Mesalazin*[tiab] OR 5-ASA[tiab] OR ASA[tiab])) OR (Asacol*[tiab] OR Ascolitin[tiab] OR Canasa[tiab] OR Claversal[tiab] OR Fivasa[tiab] OR Salofalk[tiab] OR Lix…				(((((((((Granulomatous[tiab]) AND (colitis[tiab] OR enteritis[tiab])) OR ileocolitis[tiab] OR Inflammatory bowel disease 1[tiab])) OR (((Enteritis[tiab] OR ileiti*[tiab]) AND (regional[tiab] OR terminal[tiab])))) OR ("Crohn Disease"[Mesh] OR ((Crohn's[tiab] OR Crohns[tiab]) AND (disease[tiab] OR enteritis[tiab]))))) AND ((((((("Aminosalicylic Acids"[Mesh] OR "Aminosalicylic Acid"[Mesh] OR Aminosa…				(((((((((Granulomatous[tiab]) AND (colitis[tiab] OR enteritis[tiab])) OR ileocolitis[tiab] OR Inflammatory bowel disease 1[tiab])) OR (((Enteritis[tiab] OR ileiti*[tiab]) AND (regional[tiab] OR terminal[tiab])))) OR ("Crohn Disease"[Mesh] OR ((Crohn's[tiab] OR Crohns[tiab]) AND (disease[tiab] OR enteritis[tiab]))))) AND ((((((("Aminosalicylic Acids"[Mesh] OR "Aminosalicylic Acid"[Mesh] OR Aminosa…

## Sheet: Antibiotics versus Placebo
Meta analyses / Syst. Reviews				RCTs				Observational Studies
Nr.	Query	Treffer		Nr.	Query	Treffer		Nr.	Query	Treffer
#1	"Crohn Disease"[Mesh] OR ((Crohn's[tiab] OR Crohns[tiab]) AND (disease[tiab] OR enteritis[tiab]))	48523		#1	"Crohn Disease"[Mesh] OR ((Crohn's[tiab] OR Crohns[tiab]) AND (disease[tiab] OR enteritis[tiab]))	49058		#1	"Crohn Disease"[Mesh] OR ((Crohn's[tiab] OR Crohns[tiab]) AND (disease[tiab] OR enteritis[tiab]))	49058
#2	((Enteritis[tiab] OR ileiti*[tiab]) AND (regional[tiab] OR terminal[tiab]))	2370		#2	((Enteritis[tiab] OR ileiti*[tiab]) AND (regional[tiab] OR terminal[tiab]))	2374		#2	((Enteritis[tiab] OR ileiti*[tiab]) AND (regional[tiab] OR terminal[tiab]))	2374
#3	((Granulomatous[tiab]) AND (colitis[tiab] OR enteritis[tiab])) OR ileocolitis[tiab] OR Inflammatory bowel disease 1[tiab]	1293		#3	((Granulomatous[tiab]) AND (colitis[tiab] OR enteritis[tiab])) OR ileocolitis[tiab] OR Inflammatory bowel disease 1[tiab]	1304		#3	((Granulomatous[tiab]) AND (colitis[tiab] OR enteritis[tiab])) OR ileocolitis[tiab] OR Inflammatory bowel disease 1[tiab]	1304
#4	#1 OR #2 OR #3	49479		#4	#1 OR #2 OR #3	50022		#4	#1 OR #2 OR #3	50022
Interventionen				Interventionen				Interventionen
#5	Anti-Bacterial Agents[Mesh] OR anti-Bacterial[tiab] OR anti bacterial[tiab]	335214		#5	Anti-Bacterial Agents[Mesh] OR anti-Bacterial[tiab] OR anti bacterial[tiab]	338633		#5	Anti-Bacterial Agents[Mesh] OR anti-Bacterial[tiab] OR anti bacterial[tiab]	338633
#6	bacteriocidal[tiab] OR bacteriocides[tiab] OR anti mycobacterial[tiab] OR anti-mycobacterial[tiab]	1393		#6	bacteriocidal[tiab] OR bacteriocides[tiab] OR anti mycobacterial[tiab] OR anti-mycobacterial[tiab]	1401		#6	bacteriocidal[tiab] OR bacteriocides[tiab] OR anti mycobacterial[tiab] OR anti-mycobacterial[tiab]	1401
#7	antibiotic*[tiab] OR anti-biotic*[tiab]	301004		#7	antibiotic*[tiab] OR anti-biotic*[tiab]	304494		#7	antibiotic*[tiab] OR anti-biotic*[tiab]	304494
#8	Metronidazole[Mesh] OR metronidazol*[tiab] OR 2-Methyl-5-nitroimidazole-1-ethanol[tiab] OR 2 Methyl 5 nitroimidazole 1 ethanol[tiab] OR Trichazol[tiab] OR Trichopol[tiab] OR Trivazol[tiab] OR Vagilen[tiab] OR Bayer 5360[tiab] OR Clont[tiab] OR Danizol[tiab] OR Flagyl[tiab] OR Gineflavir[tiab] OR Metric[tiab] OR Metrodzhil[tiab] OR MetroGel[tiab] OR Metrogyl[tiab] OR Satric[tiab]	38064		#8	Metronidazole[Mesh] OR metronidazol*[tiab] OR 2-Methyl-5-nitroimidazole-1-ethanol[tiab] OR 2 Methyl 5 nitroimidazole 1 ethanol[tiab] OR Trichazol[tiab] OR Trichopol[tiab] OR Trivazol[tiab] OR Vagilen[tiab] OR Bayer 5360[tiab] OR Clont[tiab] OR Danizol[tiab] OR Flagyl[tiab] OR Gineflavir[tiab] OR Metric[tiab] OR Metrodzhil[tiab] OR MetroGel[tiab] OR Metrogyl[tiab] OR Satric[tiab]	38661		#8	Metronidazole[Mesh] OR metronidazol*[tiab] OR 2-Methyl-5-nitroimidazole-1-ethanol[tiab] OR 2 Methyl 5 nitroimidazole 1 ethanol[tiab] OR Trichazol[tiab] OR Trichopol[tiab] OR Trivazol[tiab] OR Vagilen[tiab] OR Bayer 5360[tiab] OR Clont[tiab] OR Danizol[tiab] OR Flagyl[tiab] OR Gineflavir[tiab] OR Metric[tiab] OR Metrodzhil[tiab] OR MetroGel[tiab] OR Metrogyl[tiab] OR Satric[tiab]	38661
#9	Ciprofloxacin[Mesh] OR Cipro*[tiab] OR Bay-09867[tiab] OR Bay 09867[tiab] OR Bay09867[tiab] OR Ciprinol[tiab]	26208		#9	Ciprofloxacin[Mesh] OR Cipro*[tiab] OR Bay-09867[tiab] OR Bay 09867[tiab] OR Bay09867[tiab] OR Ciprinol[tiab]	26474		#9	Ciprofloxacin[Mesh] OR Cipro*[tiab] OR Bay-09867[tiab] OR Bay 09867[tiab] OR Bay09867[tiab] OR Ciprinol[tiab]	26474
#10	Clarithromycin[Mesh] OR Clarithromycin[tiab] OR 6-O-Methylerythromycin[tiab] OR TE-031[tiab] OR TE 031[tiab] OR TE031[tiab] OR A-56268[tiab] OR A 56268[tiab] OR A56268[tiab] OR Biaxin[tiab]	9622		#10	Clarithromycin[Mesh] OR Clarithromycin[tiab] OR 6-O-Methylerythromycin[tiab] OR TE-031[tiab] OR TE 031[tiab] OR TE031[tiab] OR A-56268[tiab] OR A 56268[tiab] OR A56268[tiab] OR Biaxin[tiab]	9697		#10	Clarithromycin[Mesh] OR Clarithromycin[tiab] OR 6-O-Methylerythromycin[tiab] OR TE-031[tiab] OR TE 031[tiab] OR TE031[tiab] OR A-56268[tiab] OR A 56268[tiab] OR A56268[tiab] OR Biaxin[tiab]	9697
#11	Antitubercular Agents[Mesh] OR antitubercular[tiab] OR tuberculostatic[tiab]	50443		#11	Antitubercular Agents[Mesh] OR antitubercular[tiab] OR tuberculostatic[tiab]	50791		#11	Antitubercular Agents[Mesh] OR antitubercular[tiab] OR tuberculostatic[tiab]	50791
#12	rifaximin [Supplementary Concept] OR rifaximin[tiab] OR 4-deoxy-4'-methylpyrido(1',2'-1,2)imidazo(5,4C)rifamycin[tiab] OR L 105[tiab] OR L-105[tiab] OR Redactiv[tiab] OR Xifaxan[tiab]	107		#12	rifaximin [Supplementary Concept] OR rifaximin[tiab] OR 4-deoxy-4'-methylpyrido(1',2'-1,2)imidazo(5,4C)rifamycin[tiab] OR L 105[tiab] OR L-105[tiab] OR Redactiv[tiab] OR Xifaxan[tiab]	107		#12	rifaximin [Supplementary Concept] OR rifaximin[tiab] OR 4-deoxy-4'-methylpyrido(1',2'-1,2)imidazo(5,4C)rifamycin[tiab] OR L 105[tiab] OR L-105[tiab] OR Redactiv[tiab] OR Xifaxan[tiab]	107
#13	"Rifabutin"[Mesh] OR Rifabutin*[tiab] OR Ansamycin[tiab] OR Mycobutin[tiab] OR Ansatipine[tiab] OR LM-427[tiab] OR LM 427[tiab] OR LM427[tiab] OR Alfacid[tiab] OR Ansatipin[tiab]	2856		#13	"Rifabutin"[Mesh] OR Rifabutin*[tiab] OR Ansamycin[tiab] OR Mycobutin[tiab] OR Ansatipine[tiab] OR LM-427[tiab] OR LM 427[tiab] OR LM427[tiab] OR Alfacid[tiab] OR Ansatipin[tiab]	2866		#13	"Rifabutin"[Mesh] OR Rifabutin*[tiab] OR Ansamycin[tiab] OR Mycobutin[tiab] OR Ansatipine[tiab] OR LM-427[tiab] OR LM 427[tiab] OR LM427[tiab] OR Alfacid[tiab] OR Ansatipin[tiab]	2866
#14	Rifampin[Mesh] OR rifampin[tiab] OR Benemycin[tiab] OR Rifampicin[tiab] OR Rimactan[tiab] OR Tubocin[tiab] OR Rifadin[tiab] OR Rimactane[tiab]	27217		#14	Rifampin[Mesh] OR rifampin[tiab] OR Benemycin[tiab] OR Rifampicin[tiab] OR Rimactan[tiab] OR Tubocin[tiab] OR Rifadin[tiab] OR Rimactane[tiab]	27435		#14	Rifampin[Mesh] OR rifampin[tiab] OR Benemycin[tiab] OR Rifampicin[tiab] OR Rimactan[tiab] OR Tubocin[tiab] OR Rifadin[tiab] OR Rimactane[tiab]	27435
#15	#5 OR #6 OR #7 OR #8 OR #9 OR #10 OR #11 OR #12 OR #13 OR #14	554383		#15	#5 OR #6 OR #7 OR #8 OR #9 OR #10 OR #11 OR #12 OR #13 OR #14	560327		#15	#5 OR #6 OR #7 OR #8 OR #9 OR #10 OR #11 OR #12 OR #13 OR #14	560327
Suchzeitraum				Suchzeitraum				Suchzeitraum
#16	#4 AND #15	2132		#16	#4 AND #15	2154		#16	#4 AND #15	2154
#17	(systematic*[tiab] AND (bibliographic*[TIAB] OR literature[tiab] OR review[tiab] OR reviewed[tiab] OR reviews[tiab])) OR (comprehensive*[TIAB] AND (bibliographic*[TIAB] OR literature[tiab])) OR “cochrane database syst rev”[Journal] OR "Evidencereport/technology assessment (Summary)"[journal] OR "Evidence report/technology assessment"[journal] OR "integrative literature review"[tiab] OR "integrati…	453231		#17	"Clinical Trial" [PT:NoExp] OR "clinical trial, phase i"[pt] OR "clinical trial, phase ii"[pt] OR "clinical trial, phase iii"[pt] OR "clinical trial, phase iv"[pt] OR "controlled clinical trial"[pt] OR "multicenter study"[pt] OR "randomized controlled trial"[pt] OR "Clinical Trials as Topic"[mesh:noexp] OR "clinical trials, phase i as topic"[MeSH Terms:noexp] OR "clinical trials, phase ii as topi…	1314764		#17	“Case-Control Studies”[Mesh:noexp] OR "retrospective studies"[mesh:noexp] OR “Control Groups”[Mesh:noexp] OR (case[TIAB] AND control[TIAB]) OR (cases[TIAB] AND controls[TIAB]) OR (cases[TIAB] AND controlled[TIAB]) OR (case[TIAB] AND comparison*[TIAB]) OR (cases[TIAB] AND comparison*[TIAB]) OR “control group”[TIAB] OR “control groups”[TIAB] OR cohort studies[mesh:noexp] OR longitudinal studies[mes…	3607673
#18	animals[mh] NOT humans[mh]	4443977		#18	animals[mh] NOT humans[mh]	4469938		#18	animals[mh] NOT humans[mh]	4469938
#19	#17 NOT #18	444020		#19	#11 NOT #12	1291336		#19	#11 NOT #12	3398953
#20	#15 AND #19	138		#20	#15 AND #19 and publication date: 1998- date of search	235		#20	#15 AND #19 and publication date: 1998- date of search	436
Date	20th April 2018				2018-07-03				2018-07-03
Search term	(((((systematic*[tiab] AND (bibliographic*[TIAB] OR literature[tiab] OR review[tiab] OR reviewed[tiab] OR reviews[tiab])) OR (comprehensive*[TIAB] AND (bibliographic*[TIAB] OR literature[tiab])) OR “cochrane database syst rev”[Journal] OR "Evidencereport/technology assessment (Summary)"[journal] OR "Evidence report/technology assessment"[journal] OR "integrative literature review"[tiab] OR "integ…				(((((((((((((((Anti-Bacterial Agents[Mesh] OR anti-Bacterial[tiab] OR anti bacterial[tiab])) OR (bacteriocidal[tiab] OR bacteriocides[tiab] OR anti mycobacterial[tiab] OR anti-mycobacterial[tiab])) OR (antibiotic*[tiab] OR anti-biotic*[tiab])) OR (Metronidazole[Mesh] OR metronidazol*[tiab] OR 2-Methyl-5-nitroimidazole-1-ethanol[tiab] OR 2 Methyl 5 nitroimidazole 1 ethanol[tiab] OR Trichazol[tiab]…				(((((((((Granulomatous[tiab]) AND (colitis[tiab] OR enteritis[tiab])) OR ileocolitis[tiab] OR Inflammatory bowel disease 1[tiab])) OR (((Enteritis[tiab] OR ileiti*[tiab]) AND (regional[tiab] OR terminal[tiab])))) OR ("Crohn Disease"[Mesh] OR ((Crohn's[tiab] OR Crohns[tiab]) AND (disease[tiab] OR enteritis[tiab]))))) AND (((((((((((Anti-Bacterial Agents[Mesh] OR anti-Bacterial[tiab] OR anti bacter…

## Sheet: Steroids versus Placebo
Meta analyses / Syst. Reviews				RCTs				Observational Studies
WG 1 - Induction - Syst. Corticosteroids vs Placebo				WG 1 - Induction - Syst. Corticosteroids vs Placebo				WG 1 - Induction - Syst. Corticosteroids vs Placebo
Nr.	Query	Treffer		Nr.	Query	Treffer		Nr.	Query	Treffer
#1	"Crohn Disease"[Mesh] OR ((Crohn's[tiab] OR Crohns[tiab]) AND (disease[tiab] OR enteritis[tiab]))	48750		#1	"Crohn Disease"[Mesh] OR ((Crohn's[tiab] OR Crohns[tiab]) AND (disease[tiab] OR enteritis[tiab]))	49114		#1	"Crohn Disease"[Mesh] OR ((Crohn's[tiab] OR Crohns[tiab]) AND (disease[tiab] OR enteritis[tiab]))	49114
#2	((Enteritis[tiab] OR ileiti*[tiab]) AND (regional[tiab] OR terminal[tiab]))	2373		#2	((Enteritis[tiab] OR ileiti*[tiab]) AND (regional[tiab] OR terminal[tiab]))	2374		#2	((Enteritis[tiab] OR ileiti*[tiab]) AND (regional[tiab] OR terminal[tiab]))	2374
#3	((Granulomatous[tiab]) AND (colitis[tiab] OR enteritis[tiab])) OR ileocolitis[tiab] OR Inflammatory bowel disease 1[tiab]	1299		#3	((Granulomatous[tiab]) AND (colitis[tiab] OR enteritis[tiab])) OR ileocolitis[tiab] OR Inflammatory bowel disease 1[tiab]	1304		#3	((Granulomatous[tiab]) AND (colitis[tiab] OR enteritis[tiab])) OR ileocolitis[tiab] OR Inflammatory bowel disease 1[tiab]	1304
#4	#1 OR #2 OR #3	49710		#4	#1 OR #2 OR #3	50077		#4	#1 OR #2 OR #3	50077
Interventionen				Interventionen				Interventionen
#5	Prednisone[Mesh] OR Prednisol*[tiab] OR Prednison*[tiab] OR Dehydrocortisone[tiab] OR delta-Cortisone[tiab] OR Rectodelt[tiab] OR Sterapred[tiab] OR Ultracorten[tiab] OR Winpred[tiab] OR Apo-Prednisone OR Cortan[tiab] OR Cortancyl[tiab] OR Panafcort[tiab] OR Cutason[tiab] OR Decortin[tiab] OR Dacortin[tiab] OR Decortisyl[tiab] OR Deltasone[tiab] OR Encortone[tiab] OR Encorton[tiab] OR Enkortolon[…	79502		#5	Prednisone[Mesh] OR Prednisol*[tiab] OR Prednison*[tiab] OR Dehydrocortisone[tiab] OR delta-Cortisone[tiab] OR Rectodelt[tiab] OR Sterapred[tiab] OR Ultracorten[tiab] OR Winpred[tiab] OR Apo-Prednisone OR Cortan[tiab] OR Cortancyl[tiab] OR Panafcort[tiab] OR Cutason[tiab] OR Decortin[tiab] OR Dacortin[tiab] OR Decortisyl[tiab] OR Deltasone[tiab] OR Encortone[tiab] OR Encorton[tiab] OR Enkortolon[…	74656		#5	Prednisone[Mesh] OR Prednisol*[tiab] OR Prednison*[tiab] OR Dehydrocortisone[tiab] OR delta-Cortisone[tiab] OR Rectodelt[tiab] OR Sterapred[tiab] OR Ultracorten[tiab] OR Winpred[tiab] OR Apo-Prednisone OR Cortan[tiab] OR Cortancyl[tiab] OR Panafcort[tiab] OR Cutason[tiab] OR Decortin[tiab] OR Dacortin[tiab] OR Decortisyl[tiab] OR Deltasone[tiab] OR Encortone[tiab] OR Encorton[tiab] OR Enkortolon[…	74656
#6	gluco-cort*[tiab] OR gluco-cort*[tiab] OR cortico*[tiab] OR steroid*[tiab]	349477		#6	corticosteroid[tiab] AND systemic[tiab]	6429		#6	corticosteroid[tiab] AND systemic[tiab]	6429
#7	#5 OR #6	407664		#7	#5 OR #6	80088		#7	#5 OR #6	80088
Suchzeitraum				Suchzeitraum				Suchzeitraum
#6	#4 AND #7	4604		#8	#4 AND #7	1116		#8		1116
#7	(systematic*[tiab] AND (bibliographic*[TIAB] OR literature[tiab] OR review[tiab] OR reviewed[tiab] OR reviews[tiab])) OR (comprehensive*[TIAB] AND (bibliographic*[TIAB] OR literature[tiab])) OR “cochrane database syst rev”[Journal] OR "Evidencereport/technology assessment (Summary)"[journal] OR "Evidence report/technology assessment"[journal] OR "integrative literature review"[tiab] OR "integrati…	457787		#9	"Clinical Trial" [PT:NoExp] OR "clinical trial, phase i"[pt] OR "clinical trial, phase ii"[pt] OR "clinical trial, phase iii"[pt] OR "clinical trial, phase iv"[pt] OR "controlled clinical trial"[pt] OR "multicenter study"[pt] OR "randomized controlled trial"[pt] OR "Clinical Trials as Topic"[mesh:noexp] OR "clinical trials, phase i as topic"[MeSH Terms:noexp] OR "clinical trials, phase ii as topi…	1316210		#9	“Case-Control Studies”[Mesh:noexp] OR "retrospective studies"[mesh:noexp] OR “Control Groups”[Mesh:noexp] OR (case[TIAB] AND control[TIAB]) OR (cases[TIAB] AND controls[TIAB]) OR (cases[TIAB] AND controlled[TIAB]) OR (case[TIAB] AND comparison*[TIAB]) OR (cases[TIAB] AND comparison*[TIAB]) OR “control group”[TIAB] OR “control groups”[TIAB] OR cohort studies[mesh:noexp] OR longitudinal studies[mes…	3613007
#8	animals[mh] NOT humans[mh]	4454189		#10	animals[mh] NOT humans[mh]	4473161		#10	animals[mh] NOT humans[mh]	4473161
#9	#7 NOT #8	448510		#11	#9 NOT #10	1292752		#11	#9 NOT #10	3403918
#10	#6 AND #8	281		#12	#8 AND #11 and publication date: 1998- date of search	134		#12	#8 AND #11 and publication date: 1998- date of search	226
Date	2018-05-18				2018-07-11				2018-07-11
Search term	(((((systematic*[tiab] AND (bibliographic*[TIAB] OR literature[tiab] OR review[tiab] OR reviewed[tiab] OR reviews[tiab])) OR (comprehensive*[TIAB] AND (bibliographic*[TIAB] OR literature[tiab])) OR “cochrane database syst rev”[Journal] OR "Evidencereport/technology assessment (Summary)"[journal] OR "Evidence report/technology assessment"[journal] OR "integrative literature review"[tiab] OR "integ…				Search (((((((("Crohn Disease"[Mesh] OR ((Crohn's[tiab] OR Crohns[tiab]) AND (disease[tiab] OR enteritis[tiab]))))) OR ((((Enteritis[tiab] OR ileiti*[tiab]) AND (regional[tiab] OR terminal[tiab]))))) OR ((((Granulomatous[tiab]) AND (colitis[tiab] OR enteritis[tiab])) OR ileocolitis[tiab] OR Inflammatory bowel disease 1[tiab])))) AND ((((Prednisone[Mesh] OR Prednisol*[tiab] OR Prednison*[tiab] OR …				Search (((((((("Crohn Disease"[Mesh] OR ((Crohn's[tiab] OR Crohns[tiab]) AND (disease[tiab] OR enteritis[tiab]))))) OR ((((Enteritis[tiab] OR ileiti*[tiab]) AND (regional[tiab] OR terminal[tiab]))))) OR ((((Granulomatous[tiab]) AND (colitis[tiab] OR enteritis[tiab])) OR ileocolitis[tiab] OR Inflammatory bowel disease 1[tiab])))) AND ((((Prednisone[Mesh] OR Prednisol*[tiab] OR Prednison*[tiab] OR …

## Sheet: MTX versus Placebo
Meta analyses / Syst. Reviews				RCTs				Observational Studies
WG 1 - Induction Methotrexate vs Placebo				WG 1 - Induction Methotrexate vs Placebo				WG 1 - Induction Methotrexate vs Placebo
Nr.	Query	Treffer		Nr.	Query	Treffer		Nr.	Query	Treffer
#1	"Crohn Disease"[Mesh] OR ((Crohn's[tiab] OR Crohns[tiab]) AND (disease[tiab] OR enteritis[tiab]))	48420		#1	"Crohn Disease"[Mesh] OR ((Crohn's[tiab] OR Crohns[tiab]) AND (disease[tiab] OR enteritis[tiab]))	49067		#1	"Crohn Disease"[Mesh] OR ((Crohn's[tiab] OR Crohns[tiab]) AND (disease[tiab] OR enteritis[tiab]))	49067
#2	((Enteritis[tiab] OR ileiti*[tiab]) AND (regional[tiab] OR terminal[tiab]))	2369		#2	((Enteritis[tiab] OR ileiti*[tiab]) AND (regional[tiab] OR terminal[tiab]))	2374		#2	((Enteritis[tiab] OR ileiti*[tiab]) AND (regional[tiab] OR terminal[tiab]))	2374
#3	((Granulomatous[tiab]) AND (colitis[tiab] OR enteritis[tiab])) OR ileocolitis[tiab] OR Inflammatory bowel disease 1[tiab]	1291		#3	((Granulomatous[tiab]) AND (colitis[tiab] OR enteritis[tiab])) OR ileocolitis[tiab] OR Inflammatory bowel disease 1[tiab]	1304		#3	((Granulomatous[tiab]) AND (colitis[tiab] OR enteritis[tiab])) OR ileocolitis[tiab] OR Inflammatory bowel disease 1[tiab]	1304
#4	#1 OR #2 OR #3	49373		#4	#1 OR #2 OR #3	50031		#4	#1 OR #2 OR #3	50031
Interventionen				Interventionen				Interventionen
#5	Methotrexate[Mesh]	35432		#5	Methotrexate[Mesh]	35667		#5	Methotrexate[Mesh]	35667
#6	Methotrexat*[tiab] OR Amethopterin[tiab] OR Mexat*[tiab]	37972		#6	Methotrexat*[tiab] OR Amethopterin[tiab] OR Mexat*[tiab]	38394		#6	Methotrexat*[tiab] OR Amethopterin[tiab] OR Mexat*[tiab]	38394
#7	#5 OR #6	49870		#7	#5 OR #6	50331		#7	#5 OR #6	50331
Suchzeitraum				Suchzeitraum				Suchzeitraum
#8	#4 AND #7	730		#8	#4 AND #7	741		#8	#4 AND #7	741
#9	(systematic*[tiab] AND (bibliographic*[TIAB] OR literature[tiab] OR review[tiab] OR reviewed[tiab] OR reviews[tiab])) OR (comprehensive*[TIAB] AND (bibliographic*[TIAB] OR literature[tiab])) OR “cochrane database syst rev”[Journal] OR "Evidencereport/technology assessment (Summary)"[journal] OR "Evidence report/technology assessment"[journal] OR "integrative literature review"[tiab] OR "integrati…	451072		#9	"Clinical Trial" [PT:NoExp] OR "clinical trial, phase i"[pt] OR "clinical trial, phase ii"[pt] OR "clinical trial, phase iii"[pt] OR "clinical trial, phase iv"[pt] OR "controlled clinical trial"[pt] OR "multicenter study"[pt] OR "randomized controlled trial"[pt] OR "Clinical Trials as Topic"[mesh:noexp] OR "clinical trials, phase i as topic"[MeSH Terms:noexp] OR "clinical trials, phase ii as topi…	1314906		#9	“Case-Control Studies”[Mesh:noexp] OR "retrospective studies"[mesh:noexp] OR “Control Groups”[Mesh:noexp] OR (case[TIAB] AND control[TIAB]) OR (cases[TIAB] AND controls[TIAB]) OR (cases[TIAB] AND controlled[TIAB]) OR (case[TIAB] AND comparison*[TIAB]) OR (cases[TIAB] AND comparison*[TIAB]) OR “control group”[TIAB] OR “control groups”[TIAB] OR cohort studies[mesh:noexp] OR longitudinal studies[mes…	3608331
#10	animals[mh] NOT humans[mh]	4440069		#10	animals[mh] NOT humans[mh]	4470297		#10	animals[mh] NOT humans[mh]	4470297
#11	#9 NOT #10	441889		#11	#9 NOT #10	1291476		#11	#9 NOT #10	3399571
#12	#8 AND #11	92		#12	#8 AND #11 and publication date: 1998- date of search	170		#12	#8 AND #11 and publication date: 1998- date of search	219
Date	04th April.2018				2018-07-04				2018-07-04
Search term	((((((Methotrexat*[tiab] OR Amethopterin[tiab] OR Mexat*[tiab])) OR Methotrexate[Mesh])) AND (((("Crohn Disease"[Mesh] OR ((Crohn's[tiab] OR Crohns[tiab]) AND (disease[tiab] OR enteritis[tiab])))) OR (((Enteritis[tiab] OR ileiti*[tiab]) AND (regional[tiab] OR terminal[tiab])))) OR (((Granulomatous[tiab]) AND (colitis[tiab] OR enteritis[tiab])) OR ileocolitis[tiab] OR Inflammatory bowel disease 1[…				(((((((("Crohn Disease"[Mesh] OR ((Crohn's[tiab] OR Crohns[tiab]) AND (disease[tiab] OR enteritis[tiab]))))) OR ((((Enteritis[tiab] OR ileiti*[tiab]) AND (regional[tiab] OR terminal[tiab]))))) OR ((((Granulomatous[tiab]) AND (colitis[tiab] OR enteritis[tiab])) OR ileocolitis[tiab] OR Inflammatory bowel disease 1[tiab])))) AND ((Methotrexate[Mesh]) OR ((Methotrexat*[tiab] OR Amethopterin[tiab] OR …				(((((((("Crohn Disease"[Mesh] OR ((Crohn's[tiab] OR Crohns[tiab]) AND (disease[tiab] OR enteritis[tiab]))))) OR ((((Enteritis[tiab] OR ileiti*[tiab]) AND (regional[tiab] OR terminal[tiab]))))) OR ((((Granulomatous[tiab]) AND (colitis[tiab] OR enteritis[tiab])) OR ileocolitis[tiab] OR Inflammatory bowel disease 1[tiab])))) AND ((Methotrexate[Mesh]) OR ((Methotrexat*[tiab] OR Amethopterin[tiab] OR …

## Sheet: MTX versus Thiopurines
Meta analyses / Syst. Reviews				RCTs				Observational Studies
WG 1 - Induction - Thiopurine vs Methotrexate				WG 1 - Induction - Thiopurine vs Methotrexate				WG 1 - Induction - Thiopurine vs Methotrexate
Nr.	Query	Treffer		Nr.	Query	Treffer		Nr.	Query	Treffer
#1	"Crohn Disease"[Mesh] OR ((Crohn's[tiab] OR Crohns[tiab]) AND (disease[tiab] OR enteritis[tiab]))	48420		#1	"Crohn Disease"[Mesh] OR ((Crohn's[tiab] OR Crohns[tiab]) AND (disease[tiab] OR enteritis[tiab]))	49067		#1	"Crohn Disease"[Mesh] OR ((Crohn's[tiab] OR Crohns[tiab]) AND (disease[tiab] OR enteritis[tiab]))	49067
#2	((Enteritis[tiab] OR ileiti*[tiab]) AND (regional[tiab] OR terminal[tiab]))	2369		#2	((Enteritis[tiab] OR ileiti*[tiab]) AND (regional[tiab] OR terminal[tiab]))	2374		#2	((Enteritis[tiab] OR ileiti*[tiab]) AND (regional[tiab] OR terminal[tiab]))	2374
#3	((Granulomatous[tiab]) AND (colitis[tiab] OR enteritis[tiab])) OR ileocolitis[tiab] OR Inflammatory bowel disease 1[tiab]	1291		#3	((Granulomatous[tiab]) AND (colitis[tiab] OR enteritis[tiab])) OR ileocolitis[tiab] OR Inflammatory bowel disease 1[tiab]	1304		#3	((Granulomatous[tiab]) AND (colitis[tiab] OR enteritis[tiab])) OR ileocolitis[tiab] OR Inflammatory bowel disease 1[tiab]	1304
#4	#1 OR #2 OR #3	49373		#4	#1 OR #2 OR #3	50031		#4	#1 OR #2 OR #3	50031
Interventionen				Interventionen				Interventionen
#5	Mercaptopurine[Mesh]	18884		#5	Mercaptopurine[Mesh]	18966		#5	Mercaptopurine[Mesh]	18966
#6	6-Thiopurin*[tiab] OR 6 Thiopurin*[tiab] OR 6-Mercaptopurin[tiab] OR 6 Mercaptopurin[tiab] OR 1,7-Dihydro-6H-purine-6-thione[tiab] OR 6 Thiohypoxanthine[tiab] OR 6-Thiohypoxanthine[tiab]	103		#6	6-Thiopurin*[tiab] OR 6 Thiopurin*[tiab] OR 6-Mercaptopurin[tiab] OR 6 Mercaptopurin[tiab] OR 1,7-Dihydro-6H-purine-6-thione[tiab] OR 6 Thiohypoxanthine[tiab] OR 6-Thiohypoxanthine[tiab]	104		#6	6-Thiopurin*[tiab] OR 6 Thiopurin*[tiab] OR 6-Mercaptopurin[tiab] OR 6 Mercaptopurin[tiab] OR 1,7-Dihydro-6H-purine-6-thione[tiab] OR 6 Thiohypoxanthine[tiab] OR 6-Thiohypoxanthine[tiab]	104
#7	Leupurin[tiab] OR Purimethol[tiab] OR Mercaptopurin*[tiab] OR BW 57-323H[tiab] OR BW 57 323H[tiab] OR BW 57323H[tiab] OR Purinethol[tiab] OR Puri-Nethol[tiab] OR Puri Nethol[tiab]	4702		#7	Leupurin[tiab] OR Purimethol[tiab] OR Mercaptopurin*[tiab] OR BW 57-323H[tiab] OR BW 57 323H[tiab] OR BW 57323H[tiab] OR Purinethol[tiab] OR Puri-Nethol[tiab] OR Puri Nethol[tiab]	4730		#7	Leupurin[tiab] OR Purimethol[tiab] OR Mercaptopurin*[tiab] OR BW 57-323H[tiab] OR BW 57 323H[tiab] OR BW 57323H[tiab] OR Purinethol[tiab] OR Puri-Nethol[tiab] OR Puri Nethol[tiab]	4730
#8	Azathioprine[Mesh]	14049		#8	Azathioprine[Mesh]	14111		#8	Azathioprine[Mesh]	14111
#9	Azathioprin*[tiab] OR Imurel[tiab] OR Imuran[tiab] OR Immuran[tiab]	14713		#9	Azathioprin*[tiab] OR Imurel[tiab] OR Imuran[tiab] OR Immuran[tiab]	14842		#9	Azathioprin*[tiab] OR Imurel[tiab] OR Imuran[tiab] OR Immuran[tiab]	14842
#10	Thioguanine[Mesh]	2488		#10	Thioguanine[Mesh]	2499		#10	Thioguanine[Mesh]	2499
#11	Thioguanin*[tiab] OR 2-Amino-6-Puriethiol[tiab] OR 2 Amino 6 Puritethinol[tiab] OR Tabloid[tiab] OR Lanvis[tiab]	3222		#11	Thioguanin*[tiab] OR 2-Amino-6-Puriethiol[tiab] OR 2 Amino 6 Puritethinol[tiab] OR Tabloid[tiab] OR Lanvis[tiab]	3247		#11	Thioguanin*[tiab] OR 2-Amino-6-Puriethiol[tiab] OR 2 Amino 6 Puritethinol[tiab] OR Tabloid[tiab] OR Lanvis[tiab]	3247
#12	#5 OR #6 OR #7 OR #8 OR #9 OR #10 OR #11	30741		#12	#5 OR #6 OR #7 OR #8 OR #9 OR #10 OR #11	30925		#12	#5 OR #6 OR #7 OR #8 OR #9 OR #10 OR #11	30925
#13	Methotrexate[Mesh]	35432		#13	Methotrexate[Mesh]	35667		#13	Methotrexate[Mesh]	35667
#14	Methotrexat*[tiab] OR Amethopterin[tiab] OR Mexat*[tiab]	37972		#14	Methotrexat*[tiab] OR Amethopterin[tiab] OR Mexat*[tiab]	38394		#14	Methotrexat*[tiab] OR Amethopterin[tiab] OR Mexat*[tiab]	38394
#15	#13 OR #14	49870		#15	#13 OR #14	50331		#15	#13 OR #14	50331
#16	#12 AND #15	4255		#16	#12 AND #15	4284		#16	#12 AND #15	4284
Suchzeitraum				Suchzeitraum				Suchzeitraum
#17	#4 AND #16	409		#17	#4 AND #16	412		#17	#4 AND #16	412
#18	(systematic*[tiab] AND (bibliographic*[TIAB] OR literature[tiab] OR review[tiab] OR reviewed[tiab] OR reviews[tiab])) OR (comprehensive*[TIAB] AND (bibliographic*[TIAB] OR literature[tiab])) OR “cochrane database syst rev”[Journal] OR "Evidencereport/technology assessment (Summary)"[journal] OR "Evidence report/technology assessment"[journal] OR "integrative literature review"[tiab] OR "integrati…	451072		#18	"Clinical Trial" [PT:NoExp] OR "clinical trial, phase i"[pt] OR "clinical trial, phase ii"[pt] OR "clinical trial, phase iii"[pt] OR "clinical trial, phase iv"[pt] OR "controlled clinical trial"[pt] OR "multicenter study"[pt] OR "randomized controlled trial"[pt] OR "Clinical Trials as Topic"[mesh:noexp] OR "clinical trials, phase i as topic"[MeSH Terms:noexp] OR "clinical trials, phase ii as topi…	1314906		#18	“Case-Control Studies”[Mesh:noexp] OR "retrospective studies"[mesh:noexp] OR “Control Groups”[Mesh:noexp] OR (case[TIAB] AND control[TIAB]) OR (cases[TIAB] AND controls[TIAB]) OR (cases[TIAB] AND controlled[TIAB]) OR (case[TIAB] AND comparison*[TIAB]) OR (cases[TIAB] AND comparison*[TIAB]) OR “control group”[TIAB] OR “control groups”[TIAB] OR cohort studies[mesh:noexp] OR longitudinal studies[mes…	3608331
#19	animals[mh] NOT humans[mh]	4440069		#19	animals[mh] NOT humans[mh]	4470297		#19	animals[mh] NOT humans[mh]	4470297
#20	#18 NOT #19	441889		#20	#18 NOT #19	1291476		#20	#18 NOT #19	3399571
#21	#17 AND #20	57		#21	#17 AND #20 and publication date: 1998- date of search	100		#21	#17 AND #20 and publication date: 1998- date of search	137
Date	04th April.2018				2018-07-04				2018-07-04
Search term	((((((((((((Mercaptopurine[Mesh]) OR (6-Thiopurin*[tiab] OR 6 Thiopurin*[tiab] OR 6-Mercaptopurin[tiab] OR 6 Mercaptopurin[tiab] OR 1,7-Dihydro-6H-purine-6-thione[tiab] OR 6 Thiohypoxanthine[tiab] OR 6-Thiohypoxanthine[tiab])) OR (Leupurin[tiab] OR Purimethol[tiab] OR Mercaptopurin*[tiab] OR BW 57-323H[tiab] OR BW 57 323H[tiab] OR BW 57323H[tiab] OR Purinethol[tiab] OR Puri-Nethol[tiab] OR Puri N…				(((((((("Crohn Disease"[Mesh] OR ((Crohn's[tiab] OR Crohns[tiab]) AND (disease[tiab] OR enteritis[tiab]))))) OR ((((Enteritis[tiab] OR ileiti*[tiab]) AND (regional[tiab] OR terminal[tiab]))))) OR ((((Granulomatous[tiab]) AND (colitis[tiab] OR enteritis[tiab])) OR ileocolitis[tiab] OR Inflammatory bowel disease 1[tiab])))) AND (((((((((Mercaptopurine[Mesh]) OR ((6-Thiopurin*[tiab] OR 6 Thiopurin*[…				(((((((("Crohn Disease"[Mesh] OR ((Crohn's[tiab] OR Crohns[tiab]) AND (disease[tiab] OR enteritis[tiab]))))) OR ((((Enteritis[tiab] OR ileiti*[tiab]) AND (regional[tiab] OR terminal[tiab]))))) OR ((((Granulomatous[tiab]) AND (colitis[tiab] OR enteritis[tiab])) OR ileocolitis[tiab] OR Inflammatory bowel disease 1[tiab])))) AND (((((((((Mercaptopurine[Mesh]) OR ((6-Thiopurin*[tiab] OR 6 Thiopurin*[…

## Sheet: Thiopurines versus Placebo
Meta analyses / Syst. Reviews				RCTs				Observational Studies
WG 1 - Induction Thiopurine vs Placebo				WG 1 - Induction Thiopurine vs Placebo				WG 1 - Induction Thiopurine vs Placebo
Nr.	Query	Treffer		Nr.	Query	Treffer		Nr.	Query	Treffer
#1	"Crohn Disease"[Mesh] OR ((Crohn's[tiab] OR Crohns[tiab]) AND (disease[tiab] OR enteritis[tiab]))	48420		#1	"Crohn Disease"[Mesh] OR ((Crohn's[tiab] OR Crohns[tiab]) AND (disease[tiab] OR enteritis[tiab]))	49067		#1	"Crohn Disease"[Mesh] OR ((Crohn's[tiab] OR Crohns[tiab]) AND (disease[tiab] OR enteritis[tiab]))	49067
#2	((Enteritis[tiab] OR ileiti*[tiab]) AND (regional[tiab] OR terminal[tiab]))	2369		#2	((Enteritis[tiab] OR ileiti*[tiab]) AND (regional[tiab] OR terminal[tiab]))	2374		#2	((Enteritis[tiab] OR ileiti*[tiab]) AND (regional[tiab] OR terminal[tiab]))	2374
#3	((Granulomatous[tiab]) AND (colitis[tiab] OR enteritis[tiab])) OR ileocolitis[tiab] OR Inflammatory bowel disease 1[tiab]	1291		#3	((Granulomatous[tiab]) AND (colitis[tiab] OR enteritis[tiab])) OR ileocolitis[tiab] OR Inflammatory bowel disease 1[tiab]	1304		#3	((Granulomatous[tiab]) AND (colitis[tiab] OR enteritis[tiab])) OR ileocolitis[tiab] OR Inflammatory bowel disease 1[tiab]	1304
#4	#1 OR #2 OR #3	49373		#4	#1 OR #2 OR #3	50031		#4	#1 OR #2 OR #3	50031
Interventionen				Interventionen				Interventionen
#5	Mercaptopurine[Mesh]	18884		#5	Mercaptopurine[Mesh]	18966		#5	Mercaptopurine[Mesh]	18966
#6	6-Thiopurin*[tiab] OR 6 Thiopurin*[tiab] OR 6-Mercaptopurin[tiab] OR 6 Mercaptopurin[tiab] OR 1,7-Dihydro-6H-purine-6-thione[tiab] OR 6 Thiohypoxanthine[tiab] OR 6-Thiohypoxanthine[tiab]	103		#6	6-Thiopurin*[tiab] OR 6 Thiopurin*[tiab] OR 6-Mercaptopurin[tiab] OR 6 Mercaptopurin[tiab] OR 1,7-Dihydro-6H-purine-6-thione[tiab] OR 6 Thiohypoxanthine[tiab] OR 6-Thiohypoxanthine[tiab]	104		#6	6-Thiopurin*[tiab] OR 6 Thiopurin*[tiab] OR 6-Mercaptopurin[tiab] OR 6 Mercaptopurin[tiab] OR 1,7-Dihydro-6H-purine-6-thione[tiab] OR 6 Thiohypoxanthine[tiab] OR 6-Thiohypoxanthine[tiab]	104
#7	Leupurin[tiab] OR Purimethol[tiab] OR Mercaptopurin*[tiab] OR BW 57-323H[tiab] OR BW 57 323H[tiab] OR BW 57323H[tiab] OR Purinethol[tiab] OR Puri-Nethol[tiab] OR Puri Nethol[tiab]	4702		#7	Leupurin[tiab] OR Purimethol[tiab] OR Mercaptopurin*[tiab] OR BW 57-323H[tiab] OR BW 57 323H[tiab] OR BW 57323H[tiab] OR Purinethol[tiab] OR Puri-Nethol[tiab] OR Puri Nethol[tiab]	4730		#7	Leupurin[tiab] OR Purimethol[tiab] OR Mercaptopurin*[tiab] OR BW 57-323H[tiab] OR BW 57 323H[tiab] OR BW 57323H[tiab] OR Purinethol[tiab] OR Puri-Nethol[tiab] OR Puri Nethol[tiab]	4730
#8	Azathioprine[Mesh]	14049		#8	Azathioprine[Mesh]	14111		#8	Azathioprine[Mesh]	14111
#9	Azathioprin*[tiab] OR Imurel[tiab] OR Imuran[tiab] OR Immuran[tiab]	14713		#9	Azathioprin*[tiab] OR Imurel[tiab] OR Imuran[tiab] OR Immuran[tiab]	14842		#9	Azathioprin*[tiab] OR Imurel[tiab] OR Imuran[tiab] OR Immuran[tiab]	14842
#10	Thioguanine[Mesh]	2488		#10	Thioguanine[Mesh]	2499		#10	Thioguanine[Mesh]	2499
#11	Thioguanin*[tiab] OR 2-Amino-6-Puriethiol[tiab] OR 2 Amino 6 Puritethinol[tiab] OR Tabloid[tiab] OR Lanvis[tiab]	3222		#11	Thioguanin*[tiab] OR 2-Amino-6-Puriethiol[tiab] OR 2 Amino 6 Puritethinol[tiab] OR Tabloid[tiab] OR Lanvis[tiab]	3247		#11	Thioguanin*[tiab] OR 2-Amino-6-Puriethiol[tiab] OR 2 Amino 6 Puritethinol[tiab] OR Tabloid[tiab] OR Lanvis[tiab]	3247
#12	#5 OR #6 OR #7 OR #8 OR #9 OR #10 OR #11	30741		#12	#5 OR #6 OR #7 OR #8 OR #9 OR #10 OR #11	30925		#12	#5 OR #6 OR #7 OR #8 OR #9 OR #10 OR #11	30925
Suchzeitraum				Suchzeitraum				Suchzeitraum
#13	#4 AND #12	2304		#13	#4 AND #12	2334		#13	#4 AND #12	2334
#14	(systematic*[tiab] AND (bibliographic*[TIAB] OR literature[tiab] OR review[tiab] OR reviewed[tiab] OR reviews[tiab])) OR (comprehensive*[TIAB] AND (bibliographic*[TIAB] OR literature[tiab])) OR “cochrane database syst rev”[Journal] OR "Evidencereport/technology assessment (Summary)"[journal] OR "Evidence report/technology assessment"[journal] OR "integrative literature review"[tiab] OR "integrati…	451072		#14	"Clinical Trial" [PT:NoExp] OR "clinical trial, phase i"[pt] OR "clinical trial, phase ii"[pt] OR "clinical trial, phase iii"[pt] OR "clinical trial, phase iv"[pt] OR "controlled clinical trial"[pt] OR "multicenter study"[pt] OR "randomized controlled trial"[pt] OR "Clinical Trials as Topic"[mesh:noexp] OR "clinical trials, phase i as topic"[MeSH Terms:noexp] OR "clinical trials, phase ii as topi…	1314906		#14	“Case-Control Studies”[Mesh:noexp] OR "retrospective studies"[mesh:noexp] OR “Control Groups”[Mesh:noexp] OR (case[TIAB] AND control[TIAB]) OR (cases[TIAB] AND controls[TIAB]) OR (cases[TIAB] AND controlled[TIAB]) OR (case[TIAB] AND comparison*[TIAB]) OR (cases[TIAB] AND comparison*[TIAB]) OR “control group”[TIAB] OR “control groups”[TIAB] OR cohort studies[mesh:noexp] OR longitudinal studies[mes…	3608331
#15	animals[mh] NOT humans[mh]	4440069		#15	animals[mh] NOT humans[mh]	4470297		#15	animals[mh] NOT humans[mh]	4470297
#16	#14 NOT #15	441889		#16	#14 NOT #15	1291476		#16	#14 NOT #15	3399571
#17	#13 AND #16	157		#17	#13 AND #16 and publication date: 1998- date of search	356		#17	#13 AND #16 and publication date: 1998- date of search	743
Date	04th April.2018				2018-07-04				2018-07-04
Search term	((((((((((Mercaptopurine[Mesh]) OR (6-Thiopurin*[tiab] OR 6 Thiopurin*[tiab] OR 6-Mercaptopurin[tiab] OR 6 Mercaptopurin[tiab] OR 1,7-Dihydro-6H-purine-6-thione[tiab] OR 6 Thiohypoxanthine[tiab] OR 6-Thiohypoxanthine[tiab])) OR (Leupurin[tiab] OR Purimethol[tiab] OR Mercaptopurin*[tiab] OR BW 57-323H[tiab] OR BW 57 323H[tiab] OR BW 57323H[tiab] OR Purinethol[tiab] OR Puri-Nethol[tiab] OR Puri Net…				Search (((((((("Crohn Disease"[Mesh] OR ((Crohn's[tiab] OR Crohns[tiab]) AND (disease[tiab] OR enteritis[tiab]))))) OR ((((Enteritis[tiab] OR ileiti*[tiab]) AND (regional[tiab] OR terminal[tiab]))))) OR ((((Granulomatous[tiab]) AND (colitis[tiab] OR enteritis[tiab])) OR ileocolitis[tiab] OR Inflammatory bowel disease 1[tiab])))) AND (((((((Mercaptopurine[Mesh]) OR ((6-Thiopurin*[tiab] OR 6 Thiopu…				Search (((((((("Crohn Disease"[Mesh] OR ((Crohn's[tiab] OR Crohns[tiab]) AND (disease[tiab] OR enteritis[tiab]))))) OR ((((Enteritis[tiab] OR ileiti*[tiab]) AND (regional[tiab] OR terminal[tiab]))))) OR ((((Granulomatous[tiab]) AND (colitis[tiab] OR enteritis[tiab])) OR ileocolitis[tiab] OR Inflammatory bowel disease 1[tiab])))) AND (((((((Mercaptopurine[Mesh]) OR ((6-Thiopurin*[tiab] OR 6 Thiopu…

## Sheet: Anti-TNF versus Placebo
Meta analyses / Syst. Reviews				RCTs				Observational Studies
WG 1 - Induction - TNFi vs Placebo				WG 1 - Induction - TNFi vs Placebo				WG 1 - Induction - TNFi vs Placebo
Nr.	Query	Treffer		Nr.	Query	Treffer		Nr.	Query	Treffer
#1	"Crohn Disease"[Mesh] OR ((Crohn's[tiab] OR Crohns[tiab]) AND (disease[tiab] OR enteritis[tiab]))	48420		#1	"Crohn Disease"[Mesh] OR ((Crohn's[tiab] OR Crohns[tiab]) AND (disease[tiab] OR enteritis[tiab]))	49076		#1	"Crohn Disease"[Mesh] OR ((Crohn's[tiab] OR Crohns[tiab]) AND (disease[tiab] OR enteritis[tiab]))	49076
#2	((Enteritis[tiab] OR ileiti*[tiab]) AND (regional[tiab] OR terminal[tiab]))	2369		#2	((Enteritis[tiab] OR ileiti*[tiab]) AND (regional[tiab] OR terminal[tiab]))	2374		#2	((Enteritis[tiab] OR ileiti*[tiab]) AND (regional[tiab] OR terminal[tiab]))	2374
#3	((Granulomatous[tiab]) AND (colitis[tiab] OR enteritis[tiab])) OR ileocolitis[tiab] OR Inflammatory bowel disease 1[tiab]	1291		#3	((Granulomatous[tiab]) AND (colitis[tiab] OR enteritis[tiab])) OR ileocolitis[tiab] OR Inflammatory bowel disease 1[tiab]	1304		#3	((Granulomatous[tiab]) AND (colitis[tiab] OR enteritis[tiab])) OR ileocolitis[tiab] OR Inflammatory bowel disease 1[tiab]	1304
#4	#1 OR #2 OR #3	49373		#4	#1 OR #2 OR #3	50040		#4	#1 OR #2 OR #3	50040
Interventionen				Interventionen				Interventionen
#5	Certolizumab Pegol[Mesh] OR Certolizumab*[tiab] OR Cimzia[tiab] OR CDP870[tiab] OR CDP 870[tiab]	987		#5	Certolizumab Pegol[Mesh] OR Certolizumab*[tiab] OR Cimzia[tiab] OR CDP870[tiab] OR CDP 870[tiab]	1033		#5	Certolizumab Pegol[Mesh] OR Certolizumab*[tiab] OR Cimzia[tiab] OR CDP870[tiab] OR CDP 870[tiab]	1033
#6	"Adalimumab"[Mesh] OR Adalimumab[tiab] OR D2E7 Antibody[tiab] OR Humira[tiab]	6583		#6	"Adalimumab"[Mesh] OR Adalimumab[tiab] OR D2E7 Antibody[tiab] OR Humira[tiab]	6788		#6	"Adalimumab"[Mesh] OR Adalimumab[tiab] OR D2E7 Antibody[tiab] OR Humira[tiab]	6788
#7	Infliximab[Mesh] OR infliximab[tiab] OR Mab cA2[tiab] OR Monoclonal Antibody CA2[tiab] OR Remicade[tiab]	12722		#7	Infliximab[Mesh] OR infliximab[tiab] OR Mab cA2[tiab] OR Monoclonal Antibody CA2[tiab] OR Remicade[tiab]	12946		#7	Infliximab[Mesh] OR infliximab[tiab] OR Mab cA2[tiab] OR Monoclonal Antibody CA2[tiab] OR Remicade[tiab]	12946
#8	(Tumor Necrosis Factor-alpha[Mesh] OR Tumor Necrosis Factor*[tiab] OR Cachectin*[tiab] OR TNFalpha*[tiab] OR TNF-alpha*[tiab]) AND (antibod*[tiab] OR inhibitor[tiab] OR blocker[tiab])	43905		#8	(Tumor Necrosis Factor-alpha[Mesh] OR Tumor Necrosis Factor*[tiab] OR Cachectin*[tiab] OR TNFalpha*[tiab] OR TNF-alpha*[tiab]) AND (antibod*[tiab] OR inhibitor[tiab] OR blocker[tiab])	44499		#8	(Tumor Necrosis Factor-alpha[Mesh] OR Tumor Necrosis Factor*[tiab] OR Cachectin*[tiab] OR TNFalpha*[tiab] OR TNF-alpha*[tiab]) AND (antibod*[tiab] OR inhibitor[tiab] OR blocker[tiab])	44499
#9	#5 OR #6 OR #7 OR #8	56662		#9	#5 OR #6 OR #7 OR #8	57541		#9	#5 OR #6 OR #7 OR #8	57541
#10	"Remission Induction"[Mesh] OR induc*[tiab]	2766508		#10	"Remission Induction"[Mesh] OR induc*[tiab]	2802909		#10	"Remission Induction"[Mesh] OR induc*[tiab]	2802909
#11	#9 AND #10	30657		#11	#9 AND #10	31092		#11	#9 AND #10	31092
Suchzeitraum				Suchzeitraum				Suchzeitraum
#8	#4 AND #11	1500		#12	#4 AND #11	1543		#12	#4 AND #11	1543
#9	(systematic*[tiab] AND (bibliographic*[TIAB] OR literature[tiab] OR review[tiab] OR reviewed[tiab] OR reviews[tiab])) OR (comprehensive*[TIAB] AND (bibliographic*[TIAB] OR literature[tiab])) OR “cochrane database syst rev”[Journal] OR "Evidencereport/technology assessment (Summary)"[journal] OR "Evidence report/technology assessment"[journal] OR "integrative literature review"[tiab] OR "integrati…	451072		#13	"Clinical Trial" [PT:NoExp] OR "clinical trial, phase i"[pt] OR "clinical trial, phase ii"[pt] OR "clinical trial, phase iii"[pt] OR "clinical trial, phase iv"[pt] OR "controlled clinical trial"[pt] OR "multicenter study"[pt] OR "randomized controlled trial"[pt] OR "Clinical Trials as Topic"[mesh:noexp] OR "clinical trials, phase i as topic"[MeSH Terms:noexp] OR "clinical trials, phase ii as topi…	1315011		#13	“Case-Control Studies”[Mesh:noexp] OR "retrospective studies"[mesh:noexp] OR “Control Groups”[Mesh:noexp] OR (case[TIAB] AND control[TIAB]) OR (cases[TIAB] AND controls[TIAB]) OR (cases[TIAB] AND controlled[TIAB]) OR (case[TIAB] AND comparison*[TIAB]) OR (cases[TIAB] AND comparison*[TIAB]) OR “control group”[TIAB] OR “control groups”[TIAB] OR cohort studies[mesh:noexp] OR longitudinal studies[mes…	3608940
#10	animals[mh] NOT humans[mh]	4440069		#14	animals[mh] NOT humans[mh]	4470320		#14	animals[mh] NOT humans[mh]	4470320
#11	#9 NOT #10	441889		#15	#13 NOT #14	1291581		#15	#13 NOT #14	3400180
#12	#8 AND #11	146		#16	#12 AND #15 and publication date: 1998- date of search	425		#16	#12 AND #15 and publication date: 1998- date of search	541
Date	04th April.2018				2018-07-05				2018-07-05
Search term	((((((((((Certolizumab Pegol[Mesh] OR Certolizumab*[tiab] OR Cimzia[tiab] OR CDP870[tiab] OR CDP 870[tiab])) OR ("Adalimumab"[Mesh] OR Adalimumab[tiab] OR D2E7 Antibody[tiab] OR Humira[tiab])) OR (Infliximab[Mesh] OR infliximab[tiab] OR Mab cA2[tiab] OR Monoclonal Antibody CA2[tiab] OR Remicade[tiab])) OR ((Tumor Necrosis Factor-alpha[Mesh] OR Tumor Necrosis Factor*[tiab] OR Cachectin*[tiab] OR T…				Search (((((((((((Certolizumab Pegol[Mesh] OR Certolizumab*[tiab] OR Cimzia[tiab] OR CDP870[tiab] OR CDP 870[tiab]))) OR (("Adalimumab"[Mesh] OR Adalimumab[tiab] OR D2E7 Antibody[tiab] OR Humira[tiab]))) OR ((Infliximab[Mesh] OR infliximab[tiab] OR Mab cA2[tiab] OR Monoclonal Antibody CA2[tiab] OR Remicade[tiab]))) OR (((Tumor Necrosis Factor-alpha[Mesh] OR Tumor Necrosis Factor*[tiab] OR Cachect…				Search (((((((((((Certolizumab Pegol[Mesh] OR Certolizumab*[tiab] OR Cimzia[tiab] OR CDP870[tiab] OR CDP 870[tiab]))) OR (("Adalimumab"[Mesh] OR Adalimumab[tiab] OR D2E7 Antibody[tiab] OR Humira[tiab]))) OR ((Infliximab[Mesh] OR infliximab[tiab] OR Mab cA2[tiab] OR Monoclonal Antibody CA2[tiab] OR Remicade[tiab]))) OR (((Tumor Necrosis Factor-alpha[Mesh] OR Tumor Necrosis Factor*[tiab] OR Cachect…

## Sheet: Combination versus Monotherapy
Meta analyses / Syst. Reviews				RCTs				Observational Studies
WG 1 - Induction - TNFi + thiopurine vs TNFi				WG 1 - Induction - TNFi + thiopurine vs TNFi				WG 1 - Induction - TNFi + thiopurine vs TNFi
Nr.	Query	Treffer		Nr.	Query	Treffer		Nr.	Query	Treffer
#1	"Crohn Disease"[Mesh] OR ((Crohn's[tiab] OR Crohns[tiab]) AND (disease[tiab] OR enteritis[tiab]))	48581		#1	"Crohn Disease"[Mesh] OR ((Crohn's[tiab] OR Crohns[tiab]) AND (disease[tiab] OR enteritis[tiab]))	49076		#1	"Crohn Disease"[Mesh] OR ((Crohn's[tiab] OR Crohns[tiab]) AND (disease[tiab] OR enteritis[tiab]))	49076
#2	((Enteritis[tiab] OR ileiti*[tiab]) AND (regional[tiab] OR terminal[tiab]))	2370		#2	((Enteritis[tiab] OR ileiti*[tiab]) AND (regional[tiab] OR terminal[tiab]))	2374		#2	((Enteritis[tiab] OR ileiti*[tiab]) AND (regional[tiab] OR terminal[tiab]))	2374
#3	((Granulomatous[tiab]) AND (colitis[tiab] OR enteritis[tiab])) OR ileocolitis[tiab] OR Inflammatory bowel disease 1[tiab]	1294		#3	((Granulomatous[tiab]) AND (colitis[tiab] OR enteritis[tiab])) OR ileocolitis[tiab] OR Inflammatory bowel disease 1[tiab]	1304		#3	((Granulomatous[tiab]) AND (colitis[tiab] OR enteritis[tiab])) OR ileocolitis[tiab] OR Inflammatory bowel disease 1[tiab]	1304
#4	#1 OR #2 OR #3	49537		#4	#1 OR #2 OR #3	50040		#4	#1 OR #2 OR #3	50040
Interventionen				Interventionen				Interventionen
#5	Certolizumab Pegol[Mesh] OR Certolizumab*[tiab] OR Cimzia[tiab] OR CDP870[tiab] OR CDP 870[tiab]	1001		#5	Certolizumab Pegol[Mesh] OR Certolizumab*[tiab] OR Cimzia[tiab] OR CDP870[tiab] OR CDP 870[tiab]	1033		#5	Certolizumab Pegol[Mesh] OR Certolizumab*[tiab] OR Cimzia[tiab] OR CDP870[tiab] OR CDP 870[tiab]	1033
#6	"Adalimumab"[Mesh] OR Adalimumab[tiab] OR D2E7 Antibody[tiab] OR Humira[tiab]	6638		#6	"Adalimumab"[Mesh] OR Adalimumab[tiab] OR D2E7 Antibody[tiab] OR Humira[tiab]	6788		#6	"Adalimumab"[Mesh] OR Adalimumab[tiab] OR D2E7 Antibody[tiab] OR Humira[tiab]	6788
#7	Infliximab[Mesh] OR infliximab[tiab] OR Mab cA2[tiab] OR Monoclonal Antibody CA2[tiab] OR Remicade[tiab]	12777		#7	Infliximab[Mesh] OR infliximab[tiab] OR Mab cA2[tiab] OR Monoclonal Antibody CA2[tiab] OR Remicade[tiab]	12946		#7	Infliximab[Mesh] OR infliximab[tiab] OR Mab cA2[tiab] OR Monoclonal Antibody CA2[tiab] OR Remicade[tiab]	12946
#8	(Tumor Necrosis Factor-alpha[Mesh] OR Tumor Necrosis Factor*[tiab] OR Cachectin*[tiab] OR TNFalpha*[tiab] OR TNF-alpha*[tiab]) AND (antibod*[tiab] OR inhibitor[tiab] OR blocker[tiab])	44059		#8	(Tumor Necrosis Factor-alpha[Mesh] OR Tumor Necrosis Factor*[tiab] OR Cachectin*[tiab] OR TNFalpha*[tiab] OR TNF-alpha*[tiab]) AND (antibod*[tiab] OR inhibitor[tiab] OR blocker[tiab])	44499		#8	(Tumor Necrosis Factor-alpha[Mesh] OR Tumor Necrosis Factor*[tiab] OR Cachectin*[tiab] OR TNFalpha*[tiab] OR TNF-alpha*[tiab]) AND (antibod*[tiab] OR inhibitor[tiab] OR blocker[tiab])	44499
#9	#5 OR #6 OR #7 OR #8	56892		#9	#5 OR #6 OR #7 OR #8	57541		#9	#5 OR #6 OR #7 OR #8	57541
#10	Mercaptopurine[Mesh]	18902		#10	Mercaptopurine[Mesh]	18966		#10	Mercaptopurine[Mesh]	18966
#12	6-Thiopurin*[tiab] OR 6 Thiopurin*[tiab] OR 6-Mercaptopurin[tiab] OR 6 Mercaptopurin[tiab] OR 1,7-Dihydro-6H-purine-6-thione[tiab] OR 6 Thiohypoxanthine[tiab] OR 6-Thiohypoxanthine[tiab]	103		#11	6-Thiopurin*[tiab] OR 6 Thiopurin*[tiab] OR 6-Mercaptopurin[tiab] OR 6 Mercaptopurin[tiab] OR 1,7-Dihydro-6H-purine-6-thione[tiab] OR 6 Thiohypoxanthine[tiab] OR 6-Thiohypoxanthine[tiab]	104		#11	6-Thiopurin*[tiab] OR 6 Thiopurin*[tiab] OR 6-Mercaptopurin[tiab] OR 6 Mercaptopurin[tiab] OR 1,7-Dihydro-6H-purine-6-thione[tiab] OR 6 Thiohypoxanthine[tiab] OR 6-Thiohypoxanthine[tiab]	104
#13	Leupurin[tiab] OR Purimethol[tiab] OR Mercaptopurin*[tiab] OR BW 57-323H[tiab] OR BW 57 323H[tiab] OR BW 57323H[tiab] OR Purinethol[tiab] OR Puri-Nethol[tiab] OR Puri Nethol[tiab]	4707		#12	Leupurin[tiab] OR Purimethol[tiab] OR Mercaptopurin*[tiab] OR BW 57-323H[tiab] OR BW 57 323H[tiab] OR BW 57323H[tiab] OR Purinethol[tiab] OR Puri-Nethol[tiab] OR Puri Nethol[tiab]	4730		#12	Leupurin[tiab] OR Purimethol[tiab] OR Mercaptopurin*[tiab] OR BW 57-323H[tiab] OR BW 57 323H[tiab] OR BW 57323H[tiab] OR Purinethol[tiab] OR Puri-Nethol[tiab] OR Puri Nethol[tiab]	4730
#14	Azathioprine[Mesh]	14063		#13	Azathioprine[Mesh]	14111		#13	Azathioprine[Mesh]	14111
#15	Azathioprin*[tiab] OR Imurel[tiab] OR Imuran[tiab] OR Immuran[tiab]	14744		#14	Azathioprin*[tiab] OR Imurel[tiab] OR Imuran[tiab] OR Immuran[tiab]	14843		#14	Azathioprin*[tiab] OR Imurel[tiab] OR Imuran[tiab] OR Immuran[tiab]	14843
#16	Thioguanine[Mesh]	2488		#15	Thioguanine[Mesh]	2499		#15	Thioguanine[Mesh]	2499
#17	Thioguanin*[tiab] OR 2-Amino-6-Puriethiol[tiab] OR 2 Amino 6 Puritethinol[tiab] OR Tabloid[tiab] OR Lanvis[tiab]	3227		#16	Thioguanin*[tiab] OR 2-Amino-6-Puriethiol[tiab] OR 2 Amino 6 Puritethinol[tiab] OR Tabloid[tiab] OR Lanvis[tiab]	3247		#16	Thioguanin*[tiab] OR 2-Amino-6-Puriethiol[tiab] OR 2 Amino 6 Puritethinol[tiab] OR Tabloid[tiab] OR Lanvis[tiab]	3247
#18	#10 OR #11 OR #12 OR #13 OR #14 OR #15 OR #16 OR #17	30779		#17	#10 OR #11 OR #12 OR #13 OR #14 OR #15 OR #16	30926		#17	#10 OR #11 OR #12 OR #13 OR #14 OR #15 OR #16	30926
Suchzeitraum				Suchzeitraum				Suchzeitraum
#19	#4 AND #9 AND #18	720		#18	#4 AND #9 AND #17	730		#18	#4 AND #9 AND #17	730
#20	(systematic*[tiab] AND (bibliographic*[TIAB] OR literature[tiab] OR review[tiab] OR reviewed[tiab] OR reviews[tiab])) OR (comprehensive*[TIAB] AND (bibliographic*[TIAB] OR literature[tiab])) OR “cochrane database syst rev”[Journal] OR "Evidencereport/technology assessment (Summary)"[journal] OR "Evidence report/technology assessment"[journal] OR "integrative literature review"[tiab] OR "integrati…	454330		#19	"Clinical Trial" [PT:NoExp] OR "clinical trial, phase i"[pt] OR "clinical trial, phase ii"[pt] OR "clinical trial, phase iii"[pt] OR "clinical trial, phase iv"[pt] OR "controlled clinical trial"[pt] OR "multicenter study"[pt] OR "randomized controlled trial"[pt] OR "Clinical Trials as Topic"[mesh:noexp] OR "clinical trials, phase i as topic"[MeSH Terms:noexp] OR "clinical trials, phase ii as topi…	1315011		#19	“Case-Control Studies”[Mesh:noexp] OR "retrospective studies"[mesh:noexp] OR “Control Groups”[Mesh:noexp] OR (case[TIAB] AND control[TIAB]) OR (cases[TIAB] AND controls[TIAB]) OR (cases[TIAB] AND controlled[TIAB]) OR (case[TIAB] AND comparison*[TIAB]) OR (cases[TIAB] AND comparison*[TIAB]) OR “control group”[TIAB] OR “control groups”[TIAB] OR cohort studies[mesh:noexp] OR longitudinal studies[mes…	3608940
#21	animals[mh] NOT humans[mh]	4445865		#20	animals[mh] NOT humans[mh]	4470320		#20	animals[mh] NOT humans[mh]	4470320
#22	#19 NOT #20	445113		#21	#19 NOT #20	1291581		#21	#19 NOT #20	3400180
#23	#19 AND #22	76		#22	#18 AND #21 and publication date: 1998- date of search	157		#22	#18 AND #21 and publication date: 1998- date of search	264
Date	2018-04-26				2018-07-05				2018-07-05
Search term	(((((systematic*[tiab] AND (bibliographic*[TIAB] OR literature[tiab] OR review[tiab] OR reviewed[tiab] OR reviews[tiab])) OR (comprehensive*[TIAB] AND (bibliographic*[TIAB] OR literature[tiab])) OR “cochrane database syst rev”[Journal] OR "Evidencereport/technology assessment (Summary)"[journal] OR "Evidence report/technology assessment"[journal] OR "integrative literature review"[tiab] OR "integ…				Search ((((((((("Crohn Disease"[Mesh] OR ((Crohn's[tiab] OR Crohns[tiab]) AND (disease[tiab] OR enteritis[tiab]))))) OR ((((Enteritis[tiab] OR ileiti*[tiab]) AND (regional[tiab] OR terminal[tiab]))))) OR ((((Granulomatous[tiab]) AND (colitis[tiab] OR enteritis[tiab])) OR ileocolitis[tiab] OR Inflammatory bowel disease 1[tiab])))) AND ((((((Certolizumab Pegol[Mesh] OR Certolizumab*[tiab] OR Cimzia…				Search ((((((((("Crohn Disease"[Mesh] OR ((Crohn's[tiab] OR Crohns[tiab]) AND (disease[tiab] OR enteritis[tiab]))))) OR ((((Enteritis[tiab] OR ileiti*[tiab]) AND (regional[tiab] OR terminal[tiab]))))) OR ((((Granulomatous[tiab]) AND (colitis[tiab] OR enteritis[tiab])) OR ileocolitis[tiab] OR Inflammatory bowel disease 1[tiab])))) AND ((((((Certolizumab Pegol[Mesh] OR Certolizumab*[tiab] OR Cimzia…

[truncated: 24 more sheets: Ustekinumab versus Placebo, Vedolizumab versus Placebo, Ustekinumab vs vedolizumab, Maintenance 5ASA vs PBO, Maintenance Thiopurines vs PBO, Early Thiopurines, Maintenance MTX vs PBO, Maintenance AntiTNF vs PBO, Maintenance Vedo vs PBO, Maintenance UST vs PBO, Proactive vs reactive TDM, TDM for LOR, Stopping thiopurines, Stopping IM in Combo therapy, Dose-reduction thiopurines, Stopping AntiTNF, Perianal Infliximab vs PBO, Perianal Adalimumab vs PBO, Perianal  Combo vs mono, Perianal  UST versus PBO …]
