# Supplementary material
Source: Oxford University Press journal article supplement (doi:10.1093/ecco-jcc_jjz180)
Supplement: jjz180_suppl_supplementary_file_2.xlsx [file jjz180_suppl_supplementary_file_2.xlsx]

## Sheet: 5-ASA versus Placebo
Meta analyses / Systematic Reviews				RCTs				Observational studies
	Date	2018-04-10			Date	2018-07-04			Date	2018-07-04
#	Search	Results		#	Search	Results		#	Search	Results
1	exp Crohn disease/	81562		1	exp Crohn disease/	82953		1	exp Crohn disease/	82953
2	aminosalicylic acids.mp. or exp aminosalicylic acid derivative/	2356		2	aminosalicylic acids.mp. or exp aminosalicylic acid derivative/	2365		2	aminosalicylic acids.mp. or exp aminosalicylic acid derivative/	2365
3	aminosalicylic acid.mp. or exp aminosalicylic acid/	14034		3	aminosalicylic acid.mp. or exp aminosalicylic acid/	14123		3	aminosalicylic acid.mp. or exp aminosalicylic acid/	14123
4	mesalazine/ or enteritis/ or mesalamin.mp.	66167		4	mesalazine/ or enteritis/ or mesalamin.mp.	66584		4	mesalazine/ or enteritis/ or mesalamin.mp.	66584
5	2 or 3 or 4	77056		5	2 or 3 or 4	77538		5	2 or 3 or 4	77538
6	1 and 5	21508		6	1 and 5	21622		6	1 and 5	21622
7	6 and "Review" [Publication Type]	4476		7	exp remission/ or remission.mp.	240099		7	exp remission/ or remission.mp.	240099
8	exp remission/ or remission.mp.	234087		8	(induction or induce).mp. [mp=title, abstract, heading word, drug trade name, original title, device manufacturer, drug manufacturer, device trade name, keyword, floating subheading word, candidate term word]	1104854		8	(induction or induce).mp. [mp=title, abstract, heading word, drug trade name, original title, device manufacturer, drug manufacturer, device trade name, keyword, floating subheading word, candidate term word]	1104854
9	(induction or induce).mp. [mp=title, abstract, heading word, drug trade name, original title, device manufacturer, drug manufacturer, device trade name, keyword, floating subheading word, candidate term word]	1091187		9	7 and 8	28967		9	7 and 8	28967
10	8 and 9	28453		10	6 and 9	711		10	6 and 9	711
11	7 and 10	241		11	crossover-procedure/ or double-blind procedure/ or randomized controlled trial/ or single-blind procedure/ or (random* or factorial* or crossover* or cross over* or placebo* or (doubl* adj blind*) or (singl* adj blind*) or assign* or allocat* or volunteer*).tw.	2053470		11	cohort studies/ or longitudinal studies/ or follow-up studies/ or prospective studies/ or retrospective studies/ or cohort.ti,ab. or longitudinal.ti,ab. or prospective.ti,ab. or retrospective.ti,ab.	2925018
12	limit 11 to (abstracts and human and english language)	212		12	("clinical trial" or "clinical trial, phase i" or "clinical trial, phase ii" or clinical trial, phase iii or clinical trial, phase iv or controlled clinical trial or "multicenter study" or "randomized controlled trial").pt. or double-blind method/ or clinical trials as topic/ or clinical trials, phase i as topic/ or clinical trials, phase ii as topic/ or clinical trials, phase iii as topic/ or cl…	1092065		12	Cross-Sectional Studies/ or Prevalence/ or (cross-sectional or prevalence or transversal).ti,ab,kw.	1207222
				13	11 or 12	2465466		13	Case-Control Studies/ or Control Groups/ or Matched-Pair Analysis/ or ((case* adj5 control*) or (case adj3 comparison*) or control group*).ti,ab.	918589
				14	10 and 13	268		14	11 or 12 or 13	4539634
				15	limit 14 to (human and english language and yr="1998 -Current")	224		15	10 and 14	212
								16	limit 15 to (human and english language and yr="1998 -Current")	167

## Sheet: Budesonide versus Placebo
Meta analyses / Systematic Reviews				RCTs				Observational studies
	Date	2018-04-10			Date	2018-07-04			Date	2018-07-04
#	Search	Results		#	Search	Results		#	Search	Results
1	exp Crohn disease/	81562		1	exp Crohn disease/	82953		1	exp Crohn disease/	82953
2	exp budesonide/	18792		2	exp budesonide/	19010		2	exp budesonide/	19010
3	(induction or induce).mp. [mp=title, abstract, heading word, drug trade name, original title, device manufacturer, drug manufacturer, device trade name, keyword, floating subheading word, candidate term word]	1091187		3	(induction or induce).mp. [mp=title, abstract, heading word, drug trade name, original title, device manufacturer, drug manufacturer, device trade name, keyword, floating subheading word, candidate term word]	1104854		3	(induction or induce).mp. [mp=title, abstract, heading word, drug trade name, original title, device manufacturer, drug manufacturer, device trade name, keyword, floating subheading word, candidate term word]	1104854
4	remission/	151400		4	remission/	156362		4	remission/	156362
5	1 and 2 and 3 and 4	187		5	1 and 2 and 3 and 4	189		5	1 and 2 and 3 and 4	189
6	5 and "Review" [Publication Type]	82		6	crossover-procedure/ or double-blind procedure/ or randomized controlled trial/ or single-blind procedure/ or (random* or factorial* or crossover* or cross over* or placebo* or (doubl* adj blind*) or (singl* adj blind*) or assign* or allocat* or volunteer*).tw.	2053470		6	cohort studies/ or longitudinal studies/ or follow-up studies/ or prospective studies/ or retrospective studies/ or cohort.ti,ab. or longitudinal.ti,ab. or prospective.ti,ab. or retrospective.ti,ab.	2925018
7	limit 6 to (abstracts and human and english language)	77		7	("clinical trial" or "clinical trial, phase i" or "clinical trial, phase ii" or clinical trial, phase iii or clinical trial, phase iv or controlled clinical trial or "multicenter study" or "randomized controlled trial").pt. or double-blind method/ or clinical trials as topic/ or clinical trials, phase i as topic/ or clinical trials, phase ii as topic/ or clinical trials, phase iii as topic/ or cl…	1092065		7	Cross-Sectional Studies/ or Prevalence/ or (cross-sectional or prevalence or transversal).ti,ab,kw.	1207222
				8	6 or 7	2465466		8	Case-Control Studies/ or Control Groups/ or Matched-Pair Analysis/ or ((case* adj5 control*) or (case adj3 comparison*) or control group*).ti,ab.	918589
				9	5 and 8	94		9	6 or 7 or 8	4539634
				10	limit 9 to (human and english language and yr="1998 -Current")	88		10	5 and 9	53
								11	5 and 9	53
								12	limit 10 to (human and english language and yr="1998 -Current")	50

## Sheet: Budesonide versus 5-ASA
Meta analyses / Systematic Reviews				RCTs				Observational studies
	Date	2018-04-10			Date	2018-07-04			Date	2018-07-04
#	Search	Results		#	Search	Results		#	Search	Results
1	exp Crohn disease/	81562		1	exp Crohn disease/	82953		1	exp Crohn disease/	82953
2	aminosalicylic acids.mp. or exp aminosalicylic acid derivative/	2356		2	aminosalicylic acids.mp. or exp aminosalicylic acid derivative/	2365		2	aminosalicylic acids.mp. or exp aminosalicylic acid derivative/	2365
3	aminosalicylic acid.mp. or exp aminosalicylic acid/	14034		3	aminosalicylic acid.mp. or exp aminosalicylic acid/	14123		3	aminosalicylic acid.mp. or exp aminosalicylic acid/	14123
4	mesalazine/ or enteritis/ or mesalamin.mp.	66167		4	mesalazine/ or enteritis/ or mesalamin.mp.	66584		4	mesalazine/ or enteritis/ or mesalamin.mp.	66584
5	2 or 3 or 4	77056		5	2 or 3 or 4	77538		5	2 or 3 or 4	77538
6	exp budesonide/	18792		6	exp budesonide/	19010		6	exp budesonide/	19010
7	(induction or induce).mp. [mp=title, abstract, heading word, drug trade name, original title, device manufacturer, drug manufacturer, device trade name, keyword, floating subheading word, candidate term word]	1091187		7	(induction or induce).mp. [mp=title, abstract, heading word, drug trade name, original title, device manufacturer, drug manufacturer, device trade name, keyword, floating subheading word, candidate term word]	1104854		7	(induction or induce).mp. [mp=title, abstract, heading word, drug trade name, original title, device manufacturer, drug manufacturer, device trade name, keyword, floating subheading word, candidate term word]	1104854
8	remission/	151400		8	remission/	156362		8	remission/	156362
9	7 and 8	16900		9	7 and 8	17251		9	7 and 8	17251
10	1 and 5 and 6 and 9	136		10	1 and 5 and 6 and 9	137		10	1 and 5 and 6 and 9	137
11	10 and "Review" [Publication Type]	78		11	crossover-procedure/ or double-blind procedure/ or randomized controlled trial/ or single-blind procedure/ or (random* or factorial* or crossover* or cross over* or placebo* or (doubl* adj blind*) or (singl* adj blind*) or assign* or allocat* or volunteer*).tw.	2053470		11	cohort studies/ or longitudinal studies/ or follow-up studies/ or prospective studies/ or retrospective studies/ or cohort.ti,ab. or longitudinal.ti,ab. or prospective.ti,ab. or retrospective.ti,ab.	2925018
12	limit 11 to (abstracts and human and english language)	73		12	("clinical trial" or "clinical trial, phase i" or "clinical trial, phase ii" or clinical trial, phase iii or clinical trial, phase iv or controlled clinical trial or "multicenter study" or "randomized controlled trial").pt. or double-blind method/ or clinical trials as topic/ or clinical trials, phase i as topic/ or clinical trials, phase ii as topic/ or clinical trials, phase iii as topic/ or cl…	1092065		12	Cross-Sectional Studies/ or Prevalence/ or (cross-sectional or prevalence or transversal).ti,ab,kw.	1207222
				13	11 or 12	2465466		13	Case-Control Studies/ or Control Groups/ or Matched-Pair Analysis/ or ((case* adj5 control*) or (case adj3 comparison*) or control group*).ti,ab.	918589
				14	10 and 13	66		14	11 or 12 or 13	4539634
				15	limit 14 to (human and english language and yr="1998 -Current")	62		15	10 and 14	27
								16	limit 15 to (human and english language and yr="1998 -Current")	26

## Sheet: Antibiotics versus Placebo
Meta analyses / Systematic Reviews				RCTs				Observational studies
	Date	2018-04-20			Date	2018-07-04			Date	2018-07-04
#	Search	Results		#	Search	Results		#	Search	Results
1	exp Crohn disease/	81935		1	exp Crohn disease/	82953		1	exp Crohn disease/	82953
2	exp anti-bacterial agents/	2983208		2	[limit 18 to (human and english language and yr="1998 -Current")]	0		2	exp anti-bacterial agents/	3016666
3	exp metronidazole/	62443		3	exp Crohn disease/	82953		3	exp metronidazole/	63071
4	exp ciprofloxacin/	87196		4	exp anti-bacterial agents/	3016666		4	exp ciprofloxacin/	88351
5	exp clarithromycin/	33484		5	exp metronidazole/	63071		5	exp clarithromycin/	33785
6	exp antitubercular agents/	164473		6	exp ciprofloxacin/	88351		6	exp antitubercular agents/	165759
7	exp rifaximin/	3941		7	exp clarithromycin/	33785		7	exp rifaximin/	4024
8	exp rifabutin/	5578		8	exp antitubercular agents/	165759		8	exp rifabutin/	5627
9	exp rifampin/	82404		9	exp rifaximin/	4024		9	exp rifampin/	83162
10	2 or 3 or 4 or 5 or 6 or 7 or 8 or 9	2983208		10	exp rifabutin/	5627		10	2 or 3 or 4 or 5 or 6 or 7 or 8 or 9	3016666
11	(induction or induce).mp. [mp=title, abstract, heading word, drug trade name, original title, device manufacturer, drug manufacturer, device trade name, keyword, floating subheading word, candidate term word]	1093031		11	exp rifampin/	83162		11	(induction or induce).mp. [mp=title, abstract, heading word, drug trade name, original title, device manufacturer, drug manufacturer, device trade name, keyword, floating subheading word, candidate term word]	1104854
12	remission/	152386		12	4 or 5 or 6 or 7 or 8 or 9 or 10 or 11	3016666		12	remission/	156362
13	11 and 12	16981		13	(induction or induce).mp. [mp=title, abstract, heading word, drug trade name, original title, device manufacturer, drug manufacturer, device trade name, keyword, floating subheading word, candidate term word]	1104854		13	11 and 12	17251
14	1 and 10 and 13	360		14	remission/	156362		14	1 and 10 and 13	367
15	14 and "Review" [Publication Type]	134		15	13 and 14	17251		15	cohort studies/ or longitudinal studies/ or follow-up studies/ or prospective studies/ or retrospective studies/ or cohort.ti,ab. or longitudinal.ti,ab. or prospective.ti,ab. or retrospective.ti,ab.	2925018
16	limit 15 to (abstracts and human and english language)	126		16	3 and 12 and 15	367		16	Cross-Sectional Studies/ or Prevalence/ or (cross-sectional or prevalence or transversal).ti,ab,kw.	1207222
				17	crossover-procedure/ or double-blind procedure/ or randomized controlled trial/ or single-blind procedure/ or (random* or factorial* or crossover* or cross over* or placebo* or (doubl* adj blind*) or (singl* adj blind*) or assign* or allocat* or volunteer*).tw.	2053470		17	Case-Control Studies/ or Control Groups/ or Matched-Pair Analysis/ or ((case* adj5 control*) or (case adj3 comparison*) or control group*).ti,ab.	918589
				18	("clinical trial" or "clinical trial, phase i" or "clinical trial, phase ii" or clinical trial, phase iii or clinical trial, phase iv or controlled clinical trial or "multicenter study" or "randomized controlled trial").pt. or double-blind method/ or clinical trials as topic/ or clinical trials, phase i as topic/ or clinical trials, phase ii as topic/ or clinical trials, phase iii as topic/ or cl…	1092065		18	15 or 16 or 17	4539634
				19	17 or 18	2465466		19	14 and 18	100
				20	16 and 19	140		20	limit 19 to (human and english language and yr="1998 -Current")	88
				21	limit 20 to (human and english language and yr="1998 -Current")	130

## Sheet: Steroids versus Placebo
Meta analyses / Systematic Reviews				RCTs				Observational studies
	Date	2018-05-18			Date	2018-07-04			Date	2018-07-04
#	Search	Results		#	Search	Results		#	Search	Results
1	exp Crohn disease/	Erweitert		1	exp Crohn disease/	82953		1	exp Crohn disease/	82953
2	exp prednisone/	164460		2	exp prednisone/	165432		2	exp prednisone/	165432
3	exp prednisolone/	120035		3	exp prednisolone/	120869		3	exp prednisolone/	120869
4	exp budesonide/	18877		4	exp budesonide/	19010		4	exp budesonide/	19010
5	(glucocort* or gluco-cort* or cortico* or steroid*).mp. [mp=title, abstract, heading word, drug trade name, original title, device manufacturer, drug manufacturer, device trade name, keyword, floating subheading word, candidate term word]	911629		5	(glucocort* or gluco-cort* or cortico* or steroid*).mp. [mp=title, abstract, heading word, drug trade name, original title, device manufacturer, drug manufacturer, device trade name, keyword, floating subheading word, candidate term word]	917342		5	(glucocort* or gluco-cort* or cortico* or steroid*).mp. [mp=title, abstract, heading word, drug trade name, original title, device manufacturer, drug manufacturer, device trade name, keyword, floating subheading word, candidate term word]	917342
6	2 or 3 or 4 or 5	1090599		6	2 or 3 or 4 or 5	1097362		6	2 or 3 or 4 or 5	1097362
7	(induce or induction).mp. [mp=title, abstract, heading word, drug trade name, original title, device manufacturer, drug manufacturer, device trade name, keyword, floating subheading word, candidate term word]	1097533		7	(induce or induction).mp. [mp=title, abstract, heading word, drug trade name, original title, device manufacturer, drug manufacturer, device trade name, keyword, floating subheading word, candidate term word]	1104854		7	(induce or induction).mp. [mp=title, abstract, heading word, drug trade name, original title, device manufacturer, drug manufacturer, device trade name, keyword, floating subheading word, candidate term word]	1104854
8	1 and 6 and 7	1833		8	1 and 6 and 7	1854		8	1 and 6 and 7	1854
9	8 and "Review" [Publication Type]	431		9	("clinical trial" or "clinical trial, phase i" or "clinical trial, phase ii" or clinical trial, phase iii or clinical trial, phase iv or controlled clinical trial or "multicenter study" or "randomized controlled trial").pt. or double-blind method/ or clinical trials as topic/ or clinical trials, phase i as topic/ or clinical trials, phase ii as topic/ or clinical trials, phase iii as topic/ or cl…	1092065		9	cohort studies/ or longitudinal studies/ or follow-up studies/ or prospective studies/ or retrospective studies/ or cohort.ti,ab. or longitudinal.ti,ab. or prospective.ti,ab. or retrospective.ti,ab.	2925018
10	limit 9 to (abstracts and human and english language)	387		10	crossover-procedure/ or double-blind procedure/ or randomized controlled trial/ or single-blind procedure/ or (random* or factorial* or crossover* or cross over* or placebo* or (doubl* adj blind*) or (singl* adj blind*) or assign* or allocat* or volunteer*).tw.	2053470		10	Cross-Sectional Studies/ or Prevalence/ or (cross-sectional or prevalence or transversal).ti,ab,kw.	1207222
				11	9 or 10	2465466		11	Case-Control Studies/ or Control Groups/ or Matched-Pair Analysis/ or ((case* adj5 control*) or (case adj3 comparison*) or control group*).ti,ab.	918589
				12	8 and 11	592		12	9 or 10 or 11	4539634
				13	limit 12 to (human and english language and yr="1998 -Current")	532		13	8 and 12	735
								14	limit 13 to (human and english language and yr="1998 -Current")	659

## Sheet: MTX versus Placebo
Meta analyses / Systematic Reviews				RCTs				Observational studies
	Date	2018-04-20			Date	2018-07-04			Date	2018-07-04
#	Search	Results		#	Search	Results		#	Search	Results
1	exp Crohn disease/	81935		1	exp Crohn disease/	82953		1	exp Crohn disease/	82953
2	exp methotrexate/	165313		2	exp methotrexate/	167053		2	exp methotrexate/	167053
3	(induction or induce).mp. [mp=title, abstract, heading word, drug trade name, original title, device manufacturer, drug manufacturer, device trade name, keyword, floating subheading word, candidate term word]	1093031		3	(induction or induce).mp. [mp=title, abstract, heading word, drug trade name, original title, device manufacturer, drug manufacturer, device trade name, keyword, floating subheading word, candidate term word]	1104854		3	(induction or induce).mp. [mp=title, abstract, heading word, drug trade name, original title, device manufacturer, drug manufacturer, device trade name, keyword, floating subheading word, candidate term word]	1104854
4	remission/	152386		4	remission/	156362		4	remission/	156362
5	3 and 4	16981		5	3 and 4	17251		5	3 and 4	17251
6	1 and 2 and 5	416		6	1 and 2 and 5	423		6	1 and 2 and 5	423
7	6 and "Review" [Publication Type]	137		7	crossover-procedure/ or double-blind procedure/ or randomized controlled trial/ or single-blind procedure/ or (random* or factorial* or crossover* or cross over* or placebo* or (doubl* adj blind*) or (singl* adj blind*) or assign* or allocat* or volunteer*).tw.	2053470		7	cohort studies/ or longitudinal studies/ or follow-up studies/ or prospective studies/ or retrospective studies/ or cohort.ti,ab. or longitudinal.ti,ab. or prospective.ti,ab. or retrospective.ti,ab.	2925018
8	limit 7 to (abstracts and human and english language)	125		8	("clinical trial" or "clinical trial, phase i" or "clinical trial, phase ii" or clinical trial, phase iii or clinical trial, phase iv or controlled clinical trial or "multicenter study" or "randomized controlled trial").pt. or double-blind method/ or clinical trials as topic/ or clinical trials, phase i as topic/ or clinical trials, phase ii as topic/ or clinical trials, phase iii as topic/ or cl…	1092065		8	Cross-Sectional Studies/ or Prevalence/ or (cross-sectional or prevalence or transversal).ti,ab,kw.	1207222
				9	7 or 8	2465466		9	Case-Control Studies/ or Control Groups/ or Matched-Pair Analysis/ or ((case* adj5 control*) or (case adj3 comparison*) or control group*).ti,ab.	918589
				10	6 and 9	155		10	7 or 8 or 9	4539634
				11	limit 10 to (human and english language and yr="1998 -Current")	149		11	6 and 10	156
								12	limit 11 to (human and english language and yr="1998 -Current")	138

## Sheet: MTX versus Thiopurines
Meta analyses / Systematic Reviews				RCTs				Observational studies
	Date	2018-04-20			Date	2018-07-04			Date	2018-07-04
#	Search	Results		#	Search	Results		#	Search	Results
1	exp Crohn disease/	81935		1	exp Crohn disease/	82953		1	exp Crohn disease/	82953
2	exp methotrexate/	165313		2	exp methotrexate/	167053		2	exp methotrexate/	167053
3	exp mercaptopurine/	27361		3	exp mercaptopurine/	27546		3	exp mercaptopurine/	27546
4	exp azathioprine/	88367		4	exp azathioprine/	89183		4	exp azathioprine/	89183
5	exp thioguanine/	9446		5	exp thioguanine/	9480		5	exp thioguanine/	9480
6	3 or 4 or 5	112382		6	3 or 4 or 5	113321		6	3 or 4 or 5	113321
7	(induction or induce).mp. [mp=title, abstract, heading word, drug trade name, original title, device manufacturer, drug manufacturer, device trade name, keyword, floating subheading word, candidate term word]	1093031		7	(induction or induce).mp. [mp=title, abstract, heading word, drug trade name, original title, device manufacturer, drug manufacturer, device trade name, keyword, floating subheading word, candidate term word]	1104854		7	(induction or induce).mp. [mp=title, abstract, heading word, drug trade name, original title, device manufacturer, drug manufacturer, device trade name, keyword, floating subheading word, candidate term word]	1104854
8	remission/	152386		8	remission/	156362		8	remission/	156362
9	7 and 8	16981		9	7 and 8	17251		9	7 and 8	17251
10	1 and 2 and 6 and 9	346		10	1 and 2 and 6 and 9	352		10	1 and 2 and 6 and 9	352
11	10 and "Review" [Publication Type]	125		11	crossover-procedure/ or double-blind procedure/ or randomized controlled trial/ or single-blind procedure/ or (random* or factorial* or crossover* or cross over* or placebo* or (doubl* adj blind*) or (singl* adj blind*) or assign* or allocat* or volunteer*).tw.	2053470		11	cohort studies/ or longitudinal studies/ or follow-up studies/ or prospective studies/ or retrospective studies/ or cohort.ti,ab. or longitudinal.ti,ab. or prospective.ti,ab. or retrospective.ti,ab.	2925018
12	limit 11 to (abstracts and human and english language)	114		12	("clinical trial" or "clinical trial, phase i" or "clinical trial, phase ii" or clinical trial, phase iii or clinical trial, phase iv or controlled clinical trial or "multicenter study" or "randomized controlled trial").pt. or double-blind method/ or clinical trials as topic/ or clinical trials, phase i as topic/ or clinical trials, phase ii as topic/ or clinical trials, phase iii as topic/ or cl…	1092065		12	Cross-Sectional Studies/ or Prevalence/ or (cross-sectional or prevalence or transversal).ti,ab,kw.	1207222
				13	11 or 12	2465466		13	Case-Control Studies/ or Control Groups/ or Matched-Pair Analysis/ or ((case* adj5 control*) or (case adj3 comparison*) or control group*).ti,ab.	918589
				14	10 and 13	130		14	11 or 12 or 13	4539634
				15	limit 14 to (human and english language and yr="1998 -Current")	126		15	10 and 14	116
								16	limit 15 to (human and english language and yr="1998 -Current")	102

## Sheet: Thiopurines versus Placebo
Meta analyses / Systematic Reviews				RCTs				Observational studies
	Date	2018-04-10			Date	2018-07-04			Date	2018-07-04
#	Search	Results		#	Search	Results		#	Search	Results
1	exp Crohn disease/	81562		1	exp Crohn disease/	82953		1	exp Crohn disease/	82953
2	exp mercaptopurine/	27339		2	exp mercaptopurine/	27546		2	exp mercaptopurine/	27546
3	exp azathioprine/	88247		3	exp azathioprine/	89183		3	exp azathioprine/	89183
4	exp thioguanine/	9441		4	exp thioguanine/	9480		4	exp thioguanine/	9480
5	(induction or induce).mp. [mp=title, abstract, heading word, drug trade name, original title, device manufacturer, drug manufacturer, device trade name, keyword, floating subheading word, candidate term word]	1091187		5	(induction or induce).mp. [mp=title, abstract, heading word, drug trade name, original title, device manufacturer, drug manufacturer, device trade name, keyword, floating subheading word, candidate term word]	1104854		5	(induction or induce).mp. [mp=title, abstract, heading word, drug trade name, original title, device manufacturer, drug manufacturer, device trade name, keyword, floating subheading word, candidate term word]	1104854
6	remission/	151400		6	remission/	156362		6	remission/	156362
7	2 or 3 or 4	112244		7	2 or 3 or 4	113321		7	2 or 3 or 4	113321
8	5 and 6	16900		8	5 and 6	17251		8	5 and 6	17251
9	1 and 7 and 8	621		9	1 and 7 and 8	635		9	1 and 7 and 8	635
10	9 and "Review" [Publication Type]	176		10	crossover-procedure/ or double-blind procedure/ or randomized controlled trial/ or single-blind procedure/ or (random* or factorial* or crossover* or cross over* or placebo* or (doubl* adj blind*) or (singl* adj blind*) or assign* or allocat* or volunteer*).tw.	2053470		10	cohort studies/ or longitudinal studies/ or follow-up studies/ or prospective studies/ or retrospective studies/ or cohort.ti,ab. or longitudinal.ti,ab. or prospective.ti,ab. or retrospective.ti,ab.	2925018
11	limit 10 to (abstracts and human and english language)	162		11	("clinical trial" or "clinical trial, phase i" or "clinical trial, phase ii" or clinical trial, phase iii or clinical trial, phase iv or controlled clinical trial or "multicenter study" or "randomized controlled trial").pt. or double-blind method/ or clinical trials as topic/ or clinical trials, phase i as topic/ or clinical trials, phase ii as topic/ or clinical trials, phase iii as topic/ or cl…	1092065		11	Cross-Sectional Studies/ or Prevalence/ or (cross-sectional or prevalence or transversal).ti,ab,kw.	1207222
				12	10 or 11	2465466		12	Case-Control Studies/ or Control Groups/ or Matched-Pair Analysis/ or ((case* adj5 control*) or (case adj3 comparison*) or control group*).ti,ab.	918589
				13	9 and 12	208		13	10 or 11 or 12	4539634
				14	limit 13 to (human and english language and yr="1998 -Current")	196		14	9 and 13	259
								15	limit 14 to (human and english language and yr="1998 -Current")	230

## Sheet: Anti-TNF versus Placebo
Meta analyses / Systematic Reviews				RCTs				Observational studies
	Date	2018-04-26			Date	2018-07-04			Date	2018-07-04
#	Search	Results		#	Search	Results		#	Search	Results
1	exp Crohn disease/	81993		1	exp Crohn disease/	82953		1	exp Crohn disease/	82953
2	exp infliximab/	43188		2	exp infliximab/	43816		2	exp infliximab/	43816
3	exp certolizumab/	5043		3	exp certolizumab/	5167		3	exp certolizumab/	5167
4	exp adalimumab/	26648		4	exp adalimumab/	27213		4	exp adalimumab/	27213
5	2 or 3 or 4	52633		5	2 or 3 or 4	53526		5	2 or 3 or 4	53526
6	(induce or induction).mp. [mp=title, abstract, heading word, drug trade name, original title, device manufacturer, drug manufacturer, device trade name, keyword, floating subheading word, candidate term word]	1094218		6	(induce or induction).mp. [mp=title, abstract, heading word, drug trade name, original title, device manufacturer, drug manufacturer, device trade name, keyword, floating subheading word, candidate term word]	1104854		6	(induce or induction).mp. [mp=title, abstract, heading word, drug trade name, original title, device manufacturer, drug manufacturer, device trade name, keyword, floating subheading word, candidate term word]	1104854
7	remission/	152768		7	remission/	156362		7	remission/	156362
8	6 and 7	17015		8	6 and 7	17251		8	6 and 7	17251
9	1 and 5 and 8	1257		9	1 and 5 and 8	1281		9	1 and 5 and 8	1281
10	9 and "Review" [Publication Type]	189		10	crossover-procedure/ or double-blind procedure/ or randomized controlled trial/ or single-blind procedure/ or (random* or factorial* or crossover* or cross over* or placebo* or (doubl* adj blind*) or (singl* adj blind*) or assign* or allocat* or volunteer*).tw.	2053470		10	cohort studies/ or longitudinal studies/ or follow-up studies/ or prospective studies/ or retrospective studies/ or cohort.ti,ab. or longitudinal.ti,ab. or prospective.ti,ab. or retrospective.ti,ab.	2925018
11	limit 10 to (abstracts and human and english language)	170		11	("clinical trial" or "clinical trial, phase i" or "clinical trial, phase ii" or clinical trial, phase iii or clinical trial, phase iv or controlled clinical trial or "multicenter study" or "randomized controlled trial").pt. or double-blind method/ or clinical trials as topic/ or clinical trials, phase i as topic/ or clinical trials, phase ii as topic/ or clinical trials, phase iii as topic/ or cl…	1092065		11	Cross-Sectional Studies/ or Prevalence/ or (cross-sectional or prevalence or transversal).ti,ab,kw.	1207222
				12	10 or 11	2465466		12	Case-Control Studies/ or Control Groups/ or Matched-Pair Analysis/ or ((case* adj5 control*) or (case adj3 comparison*) or control group*).ti,ab.	918589
				13	9 and 12	441		13	10 or 11 or 12	4539634
				14	limit 13 to (human and english language and yr="1998 -Current")	383		14	9 and 13	555
								15	limit 14 to (human and english language and yr="1998 -Current")	483

## Sheet: Combination versus Monotherapy
Meta analyses / Systematic Reviews				RCTs				Observational studies
	Date	2018-04-26			Date	2018-07-04			Date	2018-07-04
#	Search	Results		#	Search	Results		#	Search	Results
1	exp Crohn disease/	81993		1	exp Crohn disease/	82953		1	exp Crohn disease/	82953
2	exp infliximab/	43188		2	exp infliximab/	43816		2	exp infliximab/	43816
3	exp certolizumab/	5043		3	exp certolizumab/	5167		3	exp certolizumab/	5167
4	exp adalimumab/	26648		4	exp adalimumab/	27213		4	exp adalimumab/	27213
5	2 or 3 or 4	52633		5	2 or 3 or 4	53526		5	2 or 3 or 4	53526
6	exp mercaptopurine/	27386		6	exp mercaptopurine/	27546		6	exp mercaptopurine/	27546
7	exp azathioprine/	88449		7	exp azathioprine/	89183		7	exp azathioprine/	89183
8	exp thioguanine/	9452		8	exp thioguanine/	9480		8	exp thioguanine/	9480
9	6 or 7 or 8	112480		9	6 or 7 or 8	113321		9	6 or 7 or 8	113321
10	(induction or induce).mp. [mp=title, abstract, heading word, drug trade name, original title, device manufacturer, drug manufacturer, device trade name, keyword, floating subheading word, candidate term word]	1094218		10	(induction or induce).mp. [mp=title, abstract, heading word, drug trade name, original title, device manufacturer, drug manufacturer, device trade name, keyword, floating subheading word, candidate term word]	1104854		10	(induction or induce).mp. [mp=title, abstract, heading word, drug trade name, original title, device manufacturer, drug manufacturer, device trade name, keyword, floating subheading word, candidate term word]	1104854
11	remission/	152768		11	remission/	156362		11	remission/	156362
12	10 and 11	17015		12	10 and 11	17251		12	10 and 11	17251
13	1 and 5 and 9 and 12	457		13	1 and 5 and 9 and 12	465		13	1 and 5 and 9 and 12	465
14	13 and "Review" [Publication Type]	146		14	crossover-procedure/ or double-blind procedure/ or randomized controlled trial/ or single-blind procedure/ or (random* or factorial* or crossover* or cross over* or placebo* or (doubl* adj blind*) or (singl* adj blind*) or assign* or allocat* or volunteer*).tw.	2053470		14	cohort studies/ or longitudinal studies/ or follow-up studies/ or prospective studies/ or retrospective studies/ or cohort.ti,ab. or longitudinal.ti,ab. or prospective.ti,ab. or retrospective.ti,ab.	2925018
15	limit 14 to (abstracts and human and english language)	134		15	("clinical trial" or "clinical trial, phase i" or "clinical trial, phase ii" or clinical trial, phase iii or clinical trial, phase iv or controlled clinical trial or "multicenter study" or "randomized controlled trial").pt. or double-blind method/ or clinical trials as topic/ or clinical trials, phase i as topic/ or clinical trials, phase ii as topic/ or clinical trials, phase iii as topic/ or cl…	1092065		15	Cross-Sectional Studies/ or Prevalence/ or (cross-sectional or prevalence or transversal).ti,ab,kw.	1207222
				16	14 or 15	2465466		16	Case-Control Studies/ or Control Groups/ or Matched-Pair Analysis/ or ((case* adj5 control*) or (case adj3 comparison*) or control group*).ti,ab.	918589
				17	13 and 16	156		17	14 or 15 or 16	4539634
				18	limit 17 to (human and english language and yr="1998 -Current")	147		18	13 and 17	173
								19	limit 18 to (human and english language and yr="1998 -Current")	152

[truncated: 24 more sheets: Ustekinumab versus Placebo, Vedolizumab versus Placebo, Ustekinumab vs vedolizumab, Maintenance 5ASA vs PBO, Maintenance Thiopurines vs PBO, Early Thiopurines, Maintenance MTX vs PBO, Maintenance AntiTNF vs PBO, Maintenance Vedo vs PBO, Maintenance UST vs PBO, Proactive vs reactive TDM, TDM for LOR, Stopping thiopurines, Stopping IM in Combo therapy, Dose-reduction thiopurines, Stopping AntiTNF, Perianal IFX vs PBO, Perianal Adalimumab vs PBO, Perianal Combo vs mono, Perianal UST versus PBO …]
