# Supplementary material
Source: Oxford University Press journal article supplement (doi:10.1093/ecco-jcc_jjz180)
Supplement: jjz180_suppl_supplementary_file_3.xlsx [file jjz180_suppl_supplementary_file_3.xlsx]

## Sheet: 5-ASA versus Placebo
Meta analyses / Syst. Reviews				RCTs
Date Run:	2018-04-04 10:14:19			Date Run:	2018-07-03 13:56:43
ID	Search	Hits		ID	Search	Hits
#1	MeSH descriptor: [Crohn Disease] explode all trees	1177		#1	MeSH descriptor: [Crohn Disease] explode all trees	1536
#2	Crohn* and (disease or enteritis) ;ti,ab,kw	35		#2	Crohn* and (disease or enteritis) or Crohn ;ti,ab,kw	4014
#3	(enteritis or ileitis) and (regional or terminal) ;ti,ab,kw	4		#3	(enteritis or ileitis) and (regional or terminal) ;ti,ab,kw	4
#4	granulomatous and (colitis or enteritis) ;ti,ab,kw	2		#4	granulomatous and (colitis or enteritis) ;ti,ab,kw	2
#5	ileocolitis or inflammatory bowel disease 1;ti,ab,kw	40		#5	ileocolitis or inflammatory bowel disease 1;ti,ab,kw	42
#6	#1 or #2 or #3 or #4 or #5	1228		#6	#1 or #2 or #3 or #4 or #5	4019
#7	MeSH descriptor: [Aminosalicylic Acids] explode all trees	585		#7	MeSH descriptor: [Aminosalicylic Acids] explode all trees	684
#8	MeSH descriptor: [Aminosalicylic Acid] explode all trees	31		#8	MeSH descriptor: [Aminosalicylic Acid] explode all trees	49
#9	Aminosalicyl* ;ti,ab,kw	4		#9	Aminosalicyl* ;ti,ab,kw	4
#10	MeSH descriptor: [Mesalamine] explode all trees	448		#10	MeSH descriptor: [Mesalamine] explode all trees	539
#11	mesalamin* or mesalazin* or 5-ASA or ASA or Asacol* or Ascolitin or Canasa or Claversal or Fivasa or Salofalk or Lixacol or Mesasal or Pentasa or Rowasa;ti,ab,kw	11693		#11	mesalamin* or mesalazin* or 5-ASA or ASA or Asacol* or Ascolitin or Canasa or Claversal or Fivasa or Salofalk or Lixacol or Mesasal or Pentasa or Rowasa;ti,ab,kw	12254
#12	#7 or #8 or #9 or #10 or #11	11812		#12	#7 or #8 or #9 or #10 or #11	12381
#13	#6 and #12	175		#13	#6 and #12 Publication Year from 1998	359
41 Cochrane reviews and 15 other reviews		56

## Sheet: Budesonide versus Placebo
Meta analyses / Syst. Reviews				RCTs
Date Run:	2018-04-04 10:42:36			Date Run:	2018-07-03 14:00:50
ID	Search	Hits		ID	Search	Hits
#1	MeSH descriptor: [Crohn Disease] explode all trees	1177		#1	MeSH descriptor: [Crohn Disease] explode all trees	1536
#2	Crohn* and (disease or enteritis) ;ti,ab,kw	35		#2	Crohn* and (disease or enteritis) or Crohn ;ti,ab,kw	4014
#3	(enteritis or ileitis) and (regional or terminal) ;ti,ab,kw	4		#3	(enteritis or ileitis) and (regional or terminal) ;ti,ab,kw	4
#4	granulomatous and (colitis or enteritis) ;ti,ab,kw	2		#4	granulomatous and (colitis or enteritis) ;ti,ab,kw	2
#5	ileocolitis or inflammatory bowel disease 1;ti,ab,kw	40		#5	ileocolitis or inflammatory bowel disease 1;ti,ab,kw	42
#6	#1 or #2 or #3 or #4 or #5	1228		#6	#1 or #2 or #3 or #4 or #5	4019
#7	MeSH descriptor: [Budesonide] explode all trees	1375		#7	MeSH descriptor: [Budesonide] explode all trees	1617
#8	budesonid* or Horacort or Pulmicort or Rhinocort;ti,ab,kw	4005		#8	budesonid* or Horacort or Pulmicort or Rhinocort;ti,ab,kw	4246
#9	#7 or #8	4005		#9	#7 or #8	4246
#10	#6 and #9	89		#10	#6 and #9 Publication Year from 1998	166
20 Cochrane reviews, 5 other reviews		25

## Sheet: Budesonide versus 5-ASA
Meta analyses / Syst. Reviews				RCTs
Date Run:	2018-04-04 10:48:14			Date Run:	2018-07-03 14:05:47
ID	Search	Hits		ID	Search	Hits
#1	MeSH descriptor: [Crohn Disease] explode all trees	1177		#1	MeSH descriptor: [Crohn Disease] explode all trees	1536
#2	Crohn* and (disease or enteritis) ;ti,ab,kw	35		#2	Crohn* and (disease or enteritis) or Crohn;ti,ab,kw	4014
#3	(enteritis or ileitis) and (regional or terminal) ;ti,ab,kw	4		#3	(enteritis or ileitis) and (regional or terminal) ;ti,ab,kw	4
#4	granulomatous and (colitis or enteritis) ;ti,ab,kw	2		#4	granulomatous and (colitis or enteritis) ;ti,ab,kw	2
#5	ileocolitis or inflammatory bowel disease 1;ti,ab,kw	40		#5	ileocolitis or inflammatory bowel disease 1;ti,ab,kw	42
#6	#1 or #2 or #3 or #4 or #5	1228		#6	#1 or #2 or #3 or #4 or #5	4019
#7	MeSH descriptor: [Aminosalicylic Acids] explode all trees	585		#7	MeSH descriptor: [Aminosalicylic Acids] explode all trees	684
#8	MeSH descriptor: [Aminosalicylic Acid] explode all trees	31		#8	MeSH descriptor: [Aminosalicylic Acid] explode all trees	49
#9	Aminosalicyl* ;ti,ab,kw	4		#9	Aminosalicyl* ;ti,ab,kw	4
#10	MeSH descriptor: [Mesalamine] explode all trees	448		#10	MeSH descriptor: [Mesalamine] explode all trees	539
#11	mesalamin* or mesalazin* or 5-ASA or ASA or Asacol* or Ascolitin or Canasa or Claversal or Fivasa or Salofalk or Lixacol or Mesasal or Pentasa or Rowasa;ti,ab,kw	11693		#11	mesalamin* or mesalazin* or 5-ASA or ASA or Asacol* or Ascolitin or Canasa or Claversal or Fivasa or Salofalk or Lixacol or Mesasal or Pentasa or Rowasa;ti,ab,kw	12254
#12	#7 or #8 or #9 or #10 or #11	11812		#12	#7 or #8 or #9 or #10 or #11	12381
#13	MeSH descriptor: [Budesonide] explode all trees	1375		#13	MeSH descriptor: [Budesonide] explode all trees	1617
#14	budesonid* or Horacort or Pulmicort or Rhinocort;ti,ab,kw	4005		#14	budesonid* or Horacort or Pulmicort or Rhinocort;ti,ab,kw	4246
#15	#13 or #14	4005		#15	#13 or #14	4246
#16	#6 and #12 and #15	35		#16	#6 and #12 and #15 Publication Year from 1998	76
18 Cochrane reviews, 3 other reviews		21

## Sheet: Antibiotics versus Placebo
Meta analyses / Syst. Reviews				RCTs
Date Run:	2018-04-04 10:14:19			Date Run:	2018-07-03 14:12:40
ID	Search	Hits		ID	Search	Hits
Date Run:	43210.5			#1	MeSH descriptor: [Crohn Disease] explode all trees	1536
				#2	Crohn* and (disease or enteritis) or Crohn;ti,ab,kw	4014
				#3	(enteritis or ileitis) and (regional or terminal) ;ti,ab,kw	4
ID	Search	Hits		#4	granulomatous and (colitis or enteritis) ;ti,ab,kw	2
#1	MeSH descriptor: [Crohn Disease] explode all trees	1177		#5	ileocolitis or inflammatory bowel disease 1;ti,ab,kw	42
#2	Crohn* and (disease or enteritis) ;ti,ab,kw	36		#6	#1 or #2 or #3 or #4 or #5	4019
#3	(enteritis or ileitis) and (regional or terminal) ;ti,ab,kw	4		#7	MeSH descriptor: [Anti-Bacterial Agents] explode all trees	12105
#4	granulomatous and (colitis or enteritis) ;ti,ab,kw	2		#8	anti-bacterial or anti bacterial or bacteriocidal or bacteriocides or anti mycobacterial or anti-mycobacterial;ti,ab,kw	14090
#5	ileocolitis or inflammatory bowel disease 1;ti,ab,kw	40		#9	antibiotic* or anti-biotic* ; ti,ab,kw	26696
#6	#1 or #2 or #3 or #4 or #5	1229		#10	MeSH descriptor: [Metronidazole] explode all trees	2164
#7	MeSH descriptor: [Anti-Bacterial Agents] explode all trees	11172		#11	metronidazol* or 2-Methyl-5-nitroimidazole-1-ethanol or 2 Methyl 5 nitroimidazole 1 ethanol or Trichazol or Trichopol or Trivazol or Vagilen or Bayer 5360 or Clont or Danizol or Flagyl or Gineflavir or Metric or Metrodzhil or MetroGel or Metrogyl or Satric;ti,ab,kw	5534
#8	anti-bacterial or anti bacterial or bacteriocidal or bacteriocides or anti mycobacterial or anti-mycobacterial;ti,ab,kw	13079		#12	MeSH descriptor: [Ciprofloxacin] explode all trees	1098
#9	antibiotic* or anti-biotic* ; ti,ab,kw	25068		#13	Cipro* or Bay-09867 or Bay 09867 or Bay09867 or Ciprinol;ti,ab,kw	2782
#10	MeSH descriptor: [Metronidazole] explode all trees	1906		#14	MeSH descriptor: [Clarithromycin] explode all trees	1399
#11	metronidazol* or 2-Methyl-5-nitroimidazole-1-ethanol or 2 Methyl 5 nitroimidazole 1 ethanol or Trichazol or Trichopol or Trivazol or Vagilen or Bayer 5360 or Clont or Danizol or Flagyl or Gineflavir or Metric or Metrodzhil or MetroGel or Metrogyl or Satric;ti,ab,kw	5160		#15	Clarithromycin or 6-O-Methylerythromycin or TE-031 or TE 031 or TE031 or A-56268 or A 56268 or A56268 or Biaxin;ti,ab,kw	3010
#12	MeSH descriptor: [Ciprofloxacin] explode all trees	967		#16	MeSH descriptor: [Antitubercular Agents] explode all trees	1679
#13	Cipro* or Bay-09867 or Bay 09867 or Bay09867 or Ciprinol;ti,ab,kw	2617		#17	antitubercular or tuberculostatic;ti,ab,kw	1753
#14	MeSH descriptor: [Clarithromycin] explode all trees	1221		#18	rifaximin or 4-deoxy-4'-methylpyrido (1',2'-1,2) imidazo (5,4C) rifamycin or L 105 or L-105 or Redactiv or Xifaxan;ti,ab,kw	5596
#15	Clarithromycin or 6-O-Methylerythromycin or TE-031 or TE 031 or TE031 or A-56268 or A 56268 or A56268 or Biaxin;ti,ab,kw	2804		#19	MeSH descriptor: [Rifabutin] explode all trees	108
#16	MeSH descriptor: [Antitubercular Agents] explode all trees	1133		#20	Rifabutin* or Ansamycin or Mycobutin or Ansatipine or LM-427 or LM 427 or LM427 or Alfacid or Ansatipin;ti,ab,kw	253
#17	antitubercular or tuberculostatic;ti,ab,kw	1204		#21	MeSH descriptor: [Rifampin] explode all trees	1085
#18	rifaximin or 4-deoxy-4'-methylpyrido (1',2'-1,2) imidazo (5,4C) rifamycin or L 105 or L-105 or Redactiv or Xifaxan;ti,ab,kw	5336		#22	rifampin or Benemycin or Rifampicin or Rimactan or Tubocin or Rifadin or Rimactane;ti,ab,kw	2307
#19	MeSH descriptor: [Rifabutin] explode all trees	81		#23	#7 or #8 or #9 or #10 or #11 or #12 or #13 or #14 or #15 or #16 or #17 or #18 or #19 or #20 or #21 or #22	45974
#20	Rifabutin* or Ansamycin or Mycobutin or Ansatipine or LM-427 or LM 427 or LM427 or Alfacid or Ansatipin;ti,ab,kw	223		#24	#6 and #23 Publication Year from 1998	365
#21	MeSH descriptor: [Rifampin] explode all trees	932
#22	rifampin or Benemycin or Rifampicin or Rimactan or Tubocin or Rifadin or Rimactane;ti,ab,kw	2121
#23	#7 or #8 or #9 or #10 or #11 or #12 or #13 or #14 or #15 or #16 or #17 or #18 or #19 or #20 or #21 or #22	43139
#24	#6 and #23	168
52 cochrane reviews, 18 other reviews.		70

## Sheet: Steroids versus Placebo
Meta analyses / Syst. Reviews				RCTs
Date Run:	2018-05-18 09:36:01			Date Run:	2018-07-12 09:20:03
ID	Search	Hits		ID	Search	Hits
#1	MeSH descriptor: [Crohn Disease] explode all trees	1179		#1	MeSH descriptor: [Crohn Disease] explode all trees	1536
#2	Crohn* and (disease or enteritis) ;ti,ab,kw	36		#2	Crohn* and (disease or enteritis) or Crohn ;ti,ab,kw	4014
#3	(enteritis or ileitis) and (regional or terminal) ;ti,ab,kw	4		#3	(enteritis or ileitis) and (regional or terminal) ;ti,ab,kw	4
#4	granulomatous and (colitis or enteritis) ;ti,ab,kw	2		#4	granulomatous and (colitis or enteritis) ;ti,ab,kw	2
#5	ileocolitis or inflammatory bowel disease 1;ti,ab,kw	41		#5	ileocolitis or inflammatory bowel disease 1;ti,ab,kw	42
#6	#1 or #2 or #3 or #4 or #5	1232		#6	#1 or #2 or #3 or #4 or #5	4019
#7	MeSH descriptor: [Prednisone] explode all trees	3051		#7	MeSH descriptor: [Prednisone] explode all trees	3572
#8	Prednisol* or Predni* or Dehydrocortisone or delta-Cortisone or Rectodelt or Sterapred or Ultracorten or Winpred or Apo-Prednisone or Cortan or Cortancyl or Panafcort or Cutason or Decortin or Dacortin or Decortisyl or Deltasone or Encortone or Encorton or Enkortolon or Kortancyl or Liquid Pred or Meticorten or Orasone or Panasol or Pronisone or Sone or Budeson* or Pulmicort or Rhinocort or Horac…	16742		#8	Prednisol* or Predni* or Dehydrocortisone or delta-Cortisone or Rectodelt or Sterapred or Ultracorten or Winpred or Apo-Prednisone or Cortan or Cortancyl or Panafcort or Cutason or Decortin or Dacortin or Decortisyl or Deltasone or Encortone or Encorton or Enkortolon or Kortancyl or Liquid Pred or Meticorten or Orasone or Panasol or Pronisone or Sone or Budeson* or Pulmicort or Rhinocort or Horac…	18219
#9	MeSH descriptor: [Budesonide] explode all trees	1376		#9	MeSH descriptor: [Budesonide] explode all trees	1617
#10	gluco-cort* or glucocort or cortico* or steroid ;ti,ab,kw	19221		#10	gluco-cort* or glucocort or cortico* or steroid ;ti,ab,kw	20592
#11	#7 or #8 or #9 or #10	31790		#11	#7 or #8 or #9 or #10	34343
#12	#6 and #11	308		#12	#6 and #11 Publication Year from 1998	483
49 CR, 15 OR		64

## Sheet: MTX versus Placebo
Meta analyses / Syst. Reviews				RCTs
Date Run:	2018-04-05 12:33:55			Date Run:	2018-07-04 14:19:58
ID	Search	Hits		ID	Search	Hits
#1	MeSH descriptor: [Crohn Disease] explode all trees	1177		#1	MeSH descriptor: [Crohn Disease] explode all trees	1536
#2	Crohn* and (disease or enteritis) ;ti,ab,kw	36		#2	Crohn* and (disease or enteritis) or Crohn* ;ti,ab,kw	4014
#3	(enteritis or ileitis) and (regional or terminal) ;ti,ab,kw	4		#3	(enteritis or ileitis) and (regional or terminal) ;ti,ab,kw	4
#4	granulomatous and (colitis or enteritis) ;ti,ab,kw	2		#4	granulomatous and (colitis or enteritis) ;ti,ab,kw	2
#5	ileocolitis or inflammatory bowel disease 1;ti,ab,kw	40		#5	ileocolitis or inflammatory bowel disease 1;ti,ab,kw	42
#6	#1 or #2 or #3 or #4 or #5	1229		#6	#1 or #2 or #3 or #4 or #5	4019
#7	Methotrexat* or Amethopterin or Mexat*;ti,ab,kw	8782		#7	Methotrexat* or Amethopterin or Mexat*;ti, ab, kw	9522
#8	MeSH descriptor: [Methotrexate] explode all trees	3090		#8	MeSH descriptor: [Methotrexate] explode all trees	3606
#9	#7 or #8	8782		#9	#7 or #8	9522
#10	#6 and #9	82		#10	#6 and #9 Publication Year from 1998	247
				#11	Trials	156
cochrane review 33, other reviews 2		35

## Sheet: MTX versus Thiopurines
Meta analyses / Syst. Reviews				RCTs
Date Run:	2018-04-05 12:14:29			Date Run:	2018-07-05 08:26:27
ID	Search	Hits		ID	Search	Hits
#1	MeSH descriptor: [Crohn Disease] explode all trees	1177		#1	MeSH descriptor: [Crohn Disease] explode all trees	1536
#2	Crohn* and (disease or enteritis) ;ti,ab,kw	36		#2	Crohn* and (disease or enteritis) or Crohn* ;ti,ab,kw	4014
#3	(enteritis or ileitis) and (regional or terminal) ;ti,ab,kw	4		#3	(enteritis or ileitis) and (regional or terminal) ;ti,ab,kw	4
#4	granulomatous and (colitis or enteritis) ;ti,ab,kw	2		#4	granulomatous and (colitis or enteritis) ;ti,ab,kw	2
#5	ileocolitis or inflammatory bowel disease 1;ti,ab,kw	40		#5	ileocolitis or inflammatory bowel disease 1;ti,ab,kw	42
#6	#1 or #2 or #3 or #4 or #5	1229		#6	#1 or #2 or #3 or #4 or #5	4019
#7	MeSH descriptor: [Mercaptopurine] explode all trees	1303		#7	Methotrexat* or Amethopterin or Mexat*;ti, ab, kw	9522
#8	6-thiopurin* or 6 thiopurin or 6-Mercaptopurin* or 6 Mercaptopurin or 1,7-Dihydro-6H-purine-6-thione or 6 Thiohypoxanthine or 6-Thiohypoxanthine; ti,ab,kw	362		#8	MeSH descriptor: [Methotrexate] explode all trees	3606
#9	Leupurin or Purimethol or Mercaptopurin* or BW 57-323H or BW 57 323H or BW 57323H or Purinethol or Puri-Nethol or Puri Nethol;ti,ab,kw	814		#9	#7 or #8	9522
#10	MeSH descriptor: [Azathioprine] explode all trees	1144		#10	MeSH descriptor: [Mercaptopurine] explode all trees	1383
#11	Azathioprin* or Imurel or Imuran or Immuran;ti,ab,kw	3113		#11	6-Thiopurin* or 6 Thiopurin or 6-Mercaptopurin* or 6 Mercaptopurin or 1,7-Dihydro-6H-purine-6-thione or 6 Thiohypoxanthine or 6-Thiohypoxanthine; ti, ab, kw	439
#12	MeSH descriptor: [Thioguanine] explode all trees	175		#12	Leupurin or Purimethol or Mercaptopurin* or BW 57-323H or BW 57 323H or BW 57323H or Purinethol or Puri-Nethol or Puri Nethol; ti, ab, kw	866
#13	Thioguanin* or 2-Amino-6-Puriethiol or 2 Amino 6 Puritethinol or Tabloid or Lanvis;ti,ab,kw	343		#13	MeSH descriptor: [Azathioprine] explode all trees	1223
#14	#8 or #9 or #10 or #11 or #12 or #13	3885		#14	Azathioprin* or Imurel or Imuran or Immuran; ti, ab, kw	3207
#15	MeSH descriptor: [Methotrexate] explode all trees	3090		#15	MeSH descriptor: [Thioguanine] explode all trees	206
#16	Methotrexat* or Amethopterin or Mexat*;ti,ab,kw	8782		#16	Thioguanin* or 2-Amino-6-Puriethiol or 2 Amino 6 Puritethinol or Tabloid or Lanvis;ti, ab, kw	384
#17	#15 or #16	8782		#17	#10 or #11 or #12 or #13 or #14 or #15 or #16	4025
#18	#14 and #17	927		#18	#17 and #9	971
#19	#6 and #18	64		#19	#6 and #18 Publication Year from 1998	169
				#20	Trials	94
31 cochrane reviews, 2 other reviews		33

## Sheet: Thiopurines versus Placebo
Meta analyses / Syst. Reviews				RCTs
Date Run:	2018-04-05 11:38:27			Date Run:	2018-07-04 11:14:51
ID	Search	Hits		ID	Search	Hits
#1	MeSH descriptor: [Crohn Disease] explode all trees	1177		#1	MeSH descriptor: [Crohn Disease] explode all trees	1536
#2	Crohn* and (disease or enteritis) ;ti,ab,kw	36		#2	Crohn* and (disease or enteritis) or Crohn ;ti,ab,kw	4014
#3	(enteritis or ileitis) and (regional or terminal) ;ti,ab,kw	4		#3	(enteritis or ileitis) and (regional or terminal) ;ti,ab,kw	4
#4	granulomatous and (colitis or enteritis) ;ti,ab,kw	2		#4	granulomatous and (colitis or enteritis) ;ti,ab,kw	2
#5	ileocolitis or inflammatory bowel disease 1;ti,ab,kw	40		#5	ileocolitis or inflammatory bowel disease 1;ti,ab,kw	42
#6	#1 or #2 or #3 or #4 or #5	1229		#6	#1 or #2 or #3 or #4 or #5	4019
#7	MeSH descriptor: [Mercaptopurine] explode all trees	1303		#7	MeSH descriptor: [Mercaptopurine] explode all trees	1383
#8	6-thiopurin* or 6 thiopurin or 6-Mercaptopurin* or 6 Mercaptopurin or 1,7-Dihydro-6H-purine-6-thione or 6 Thiohypoxanthine or 6-Thiohypoxanthine; ti,ab,kw	362		#8	6-thiopurin* or 6 thiopurin or 6-Mercaptopurin* or 6 Mercaptopurin or 1,7-Dihydro-6H-purine-6-thione or 6 Thiohypoxanthine or 6-Thiohypoxanthine; ti,ab,kw	439
#9	Leupurin or Purimethol or Mercaptopurin* or BW 57-323H or BW 57 323H or BW 57323H or Purinethol or Puri-Nethol or Puri Nethol;ti,ab,kw	814		#9	Leupurin or Purimethol or Mercaptopurin* or BW 57-323H or BW 57 323H or BW 57323H or Purinethol or Puri-Nethol or Puri Nethol;ti,ab,kw	866
#10	MeSH descriptor: [Azathioprine] explode all trees	1144		#10	MeSH descriptor: [Azathioprine] explode all trees	1223
#11	Azathioprin* or Imurel or Imuran or Immuran;ti,ab,kw	3113		#11	Azathioprin* or Imurel or Imuran or Immuran;ti,ab,kw	3207
#12	MeSH descriptor: [Thioguanine] explode all trees	175		#12	MeSH descriptor: [Thioguanine] explode all trees	206
#13	Thioguanin* or 2-Amino-6-Puriethiol or 2 Amino 6 Puritethinol or Tabloid or Lanvis;ti,ab,kw	343		#13	Thioguanin* or 2-Amino-6-Puriethiol or 2 Amino 6 Puritethinol or Tabloid or Lanvis;ti,ab,kw	384
#14	#8 or #9 or #10 or #11 or #12 or #13	3885		#14	#8 or #9 or #10 or #11 or #12 or #13	4025
#15	#6 and #14	180		#15	#6 and #14 Publication Year from 1998	493
				#16	Trials	368
39 cochrane reviews, 11 other reviews		50

## Sheet: Anti-TNF versus Placebo
Meta analyses / Syst. Reviews				RCTs
Date Run:	2018-04-05 13:02:53			Date Run:	2018-07-05 09:00:06
ID	Search	Hits		ID	Search	Hits
#1	MeSH descriptor: [Crohn Disease] explode all trees	1177		#1	MeSH descriptor: [Crohn Disease] explode all trees	1536
#2	Crohn* and (disease or enteritis) ;ti,ab,kw	36		#2	Crohn* and (disease or enteritis) or Crohn;ti,ab,kw	4014
#3	(enteritis or ileitis) and (regional or terminal) ;ti,ab,kw	4		#3	(enteritis or ileitis) and (regional or terminal) ;ti,ab,kw	4
#4	granulomatous and (colitis or enteritis) ;ti,ab,kw	2		#4	granulomatous and (colitis or enteritis) ;ti,ab,kw	2
#5	ileocolitis or inflammatory bowel disease 1;ti,ab,kw	40		#5	ileocolitis or inflammatory bowel disease 1;ti,ab,kw	42
#6	#1 or #2 or #3 or #4 or #5	1229		#6	#1 or #2 or #3 or #4 or #5	4019
#7	MeSH descriptor: [Certolizumab Pegol] explode all trees	80		#7		1380129
#8	Certolizumab* or Cimzia or CDP870 or CDP 870;ti,ab,kw	387		#8	MeSH descriptor: [Certolizumab Pegol] explode all trees	119
#9	MeSH descriptor: [Adalimumab] explode all trees	338		#9	Certolizumab* or Cimzia or CDP870 or CDP 870;ti,ab,kw	457
#10	Adalimumab or D2E7 Antibody or Humira;ti,ab,kw	1769		#10	MeSH descriptor: [Adalimumab] explode all trees	520
#11	MeSH descriptor: [Infliximab] explode all trees	493		#11	Adalimumab or D2E7 Antibody or Humira;ti,ab,kw	2171
#12	infliximab or Mab cA2 or Monoclonal Antibody CA2 or Remicade;ti,ab,kw	1808		#12	MeSH descriptor: [Infliximab] explode all trees	626
#13	MeSH descriptor: [Tumor Necrosis Factor-alpha] explode all trees	3085		#13	infliximab or Mab cA2 or Monoclonal Antibody CA2 or Remicade;ti,ab,kw	2144
#14	Tumor Necrosis Factor* or Cachectin* or TNFalpha* or TNF-alpha* ;ti,ab,kw	9694		#14	MeSH descriptor: [Tumor Necrosis Factor-alpha] explode all trees	3117
#15	antibod* or inhibitor or blocker or antagonist;ti,ab,kw	79947		#15	Tumor Necrosis Factor* or Cachectin* or TNFalpha* or TNF-alpha* ;ti,ab,kw	10462
#16	(#13 or #14) and #15	2913		#16	antibod* or inhibitor or blocker or antagonist;ti,ab,kw	86491
#17	#7 or #8 or #9 or #10 or #11 or #12 or #16	5218		#17	(#14 or #15) and #16	3090
#18	MeSH descriptor: [Remission Induction] explode all trees	3738		#18	#8 or #9 or #10 or #11 or #12 or #13 or #17	6043
#19	induc* ;ti,ab,kw	694		#19	MeSH descriptor: [Remission Induction] explode all trees	3787
#20	#18 or #19	4423		#20	induc* ;ti,ab,kw	704
#21	#17 and #20	236		#21	#19 or #20	4482
#22	#6 and #21	92		#22	#18 and #21	236
				#23	#6 and #22 Publication Year from 1998	105
25 cochrane reviews, 6 other reviews		31		#24	Trials	63

## Sheet: Combination versus Monotherapy
Meta analyses / Syst. Reviews				RCTs
Date Run:	2018-04-27 12:28:10			Date Run:	2018-07-05 09:08:50
ID	Search	Hits		ID	Search	Hits
#1	MeSH descriptor: [Crohn Disease] explode all trees	1177		#1	MeSH descriptor: [Crohn Disease] explode all trees	1536
#2	Crohn* and (disease or enteritis) ;ti,ab,kw	36		#2	Crohn* and (disease or enteritis) or Crohn;ti,ab,kw	4014
#3	(enteritis or ileitis) and (regional or terminal) ;ti,ab,kw	4		#3	(enteritis or ileitis) and (regional or terminal) ;ti,ab,kw	4
#4	granulomatous and (colitis or enteritis) ;ti,ab,kw	2		#4	granulomatous and (colitis or enteritis) ;ti,ab,kw	2
#5	ileocolitis or inflammatory bowel disease 1;ti,ab,kw	40		#5	ileocolitis or inflammatory bowel disease 1;ti,ab,kw	42
#6	#1 or #2 or #3 or #4 or #5	1229		#6	#1 or #2 or #3 or #4 or #5	4019
#7	MeSH descriptor: [Certolizumab Pegol] explode all trees	80		#7	MeSH descriptor: [Certolizumab Pegol] explode all trees	119
#8	Certolizumab* or Cimzia or CDP870 or CDP 870;ti,ab,kw	387		#8	Certolizumab* or Cimzia or CDP870 or CDP 870;ti,ab,kw	457
#9	MeSH descriptor: [Adalimumab] explode all trees	338		#9	MeSH descriptor: [Adalimumab] explode all trees	520
#10	Adalimumab or D2E7 Antibody or Humira;ti,ab,kw	1769		#10	Adalimumab or D2E7 Antibody or Humira;ti,ab,kw	2171
#11	MeSH descriptor: [Infliximab] explode all trees	493		#11	MeSH descriptor: [Infliximab] explode all trees	626
#12	infliximab or Mab cA2 or Monoclonal Antibody CA2 or Remicade;ti,ab,kw	1808		#12	infliximab or Mab cA2 or Monoclonal Antibody CA2 or Remicade;ti,ab,kw	2144
#13	MeSH descriptor: [Tumor Necrosis Factor-alpha] explode all trees	3085		#13	MeSH descriptor: [Tumor Necrosis Factor-alpha] explode all trees	3117
#14	Tumor Necrosis Factor* or Cachectin* or TNFalpha* or TNF-alpha* ;ti,ab,kw	9693		#14	Tumor Necrosis Factor* or Cachectin* or TNFalpha* or TNF-alpha* ;ti,ab,kw	10462
#15	antibod* or inhibitor or blocker or antagonist;ti,ab,kw	79951		#15	antibod* or inhibitor or blocker or antagonist;ti,ab,kw	86491
#16	(#13 or #14) and #15	2912		#16	(#13 or #14) and #15	3090
#17	#7 or #8 or #9 or #10 or #11 or #12 or #16	5217		#17	#7 or #8 or #9 or #10 or #11 or #12 or #16	6043
#18	MeSH descriptor: [Remission Induction] explode all trees	3738		#18	MeSH descriptor: [Remission Induction] explode all trees	3787
#19	induc* ;ti,ab,kw	694		#19	induc* ;ti,ab,kw	704
#20	MeSH descriptor: [Mercaptopurine] explode all trees	1303		#20	MeSH descriptor: [Mercaptopurine] explode all trees	1383
#21	6-Thiopurin* or 6 Thiopurin* or 6-Mercaptopurin or 6 Mercaptopurin or 1,7-Dihydro-6H-purine-6-thione or 6 Thiohypoxanthine or 6-Thiohypoxanthine;ti,ab,kw	144		#21	6-Thiopurin* or 6 Thiopurin* or 6-Mercaptopurin or 6 Mercaptopurin or 1,7-Dihydro-6H-purine-6-thione or 6 Thiohypoxanthine or 6-Thiohypoxanthine;ti,ab,kw	184
#22	Leupurin or Purimethol or Mercaptopurin* or BW 57-323H or BW 57 323H or BW 57323H or Purinethol or Puri-Nethol or Puri Nethol;ti,ab,kw	814		#22	Leupurin or Purimethol or Mercaptopurin* or BW 57-323H or BW 57 323H or BW 57323H or Purinethol or Puri-Nethol or Puri Nethol;ti,ab,kw	866
#23	MeSH descriptor: [Azathioprine] explode all trees	1144		#23	MeSH descriptor: [Azathioprine] explode all trees	1223
#24	Azathioprin* or Imurel or Imuran or Immuran;ti,ab,kw	3113		#24	Azathioprin* or Imurel or Imuran or Immuran;ti,ab,kw	3207
#25	MeSH descriptor: [Thioguanine] explode all trees	175		#25	MeSH descriptor: [Thioguanine] explode all trees	206
#26	Thioguanin* or 2-Amino-6-Puriethiol or 2 Amino 6 Puritethinol or Tabloid or Lanvis;ti,ab,kw	343		#26	Thioguanin* or 2-Amino-6-Puriethiol or 2 Amino 6 Puritethinol or Tabloid or Lanvis;ti,ab,kw	384
#27	#20 or #21 or #22 or #23 or #24 or #25 or #26	3913		#27	#20 or #21 or #22 or #23 or #24 or #25 or #26	4072
#28	#6 and #17 and #27	94		#28	#6 and #17 and #27 Publication Year from 1998	304
				#29	Trials	221
29 cochrane reviews, 4 other reviews		33

[truncated: 21 more sheets: Vedolizumab versus Placebo, Ustekinumab versus Placebo, Maintenance 5ASA vs PBO, Maintenance Thiopurines vs PBO, Early Thiopurines, Maintenance MTX vs PBO, Maintenance  AntiTNF vs PBO, Maintenance Vedo vs PBO, Maintenance UST vs PBO, Proactive vs reactive, TDM for LOR, Stopping thiopurines, Stopping IM in Combo therapy, Dose-reduction thiopurines, Stopping AntiTNF, Perianal Infliximab vs PBO, Perianal Adalimumab vs PBO, Perianal Combo vs mono, Perianal UST versus PBO, Perianal Antibiotics vs PBO …]
